# Supplementary material for: Genetics of the Inverse Relationship between Grain Yield and Grain Protein Content in Common Wheat
Source: MDPI journal article supplement (doi:10.3390/plants11162146), 2022-08-18
Supplement: s1 [file s1]

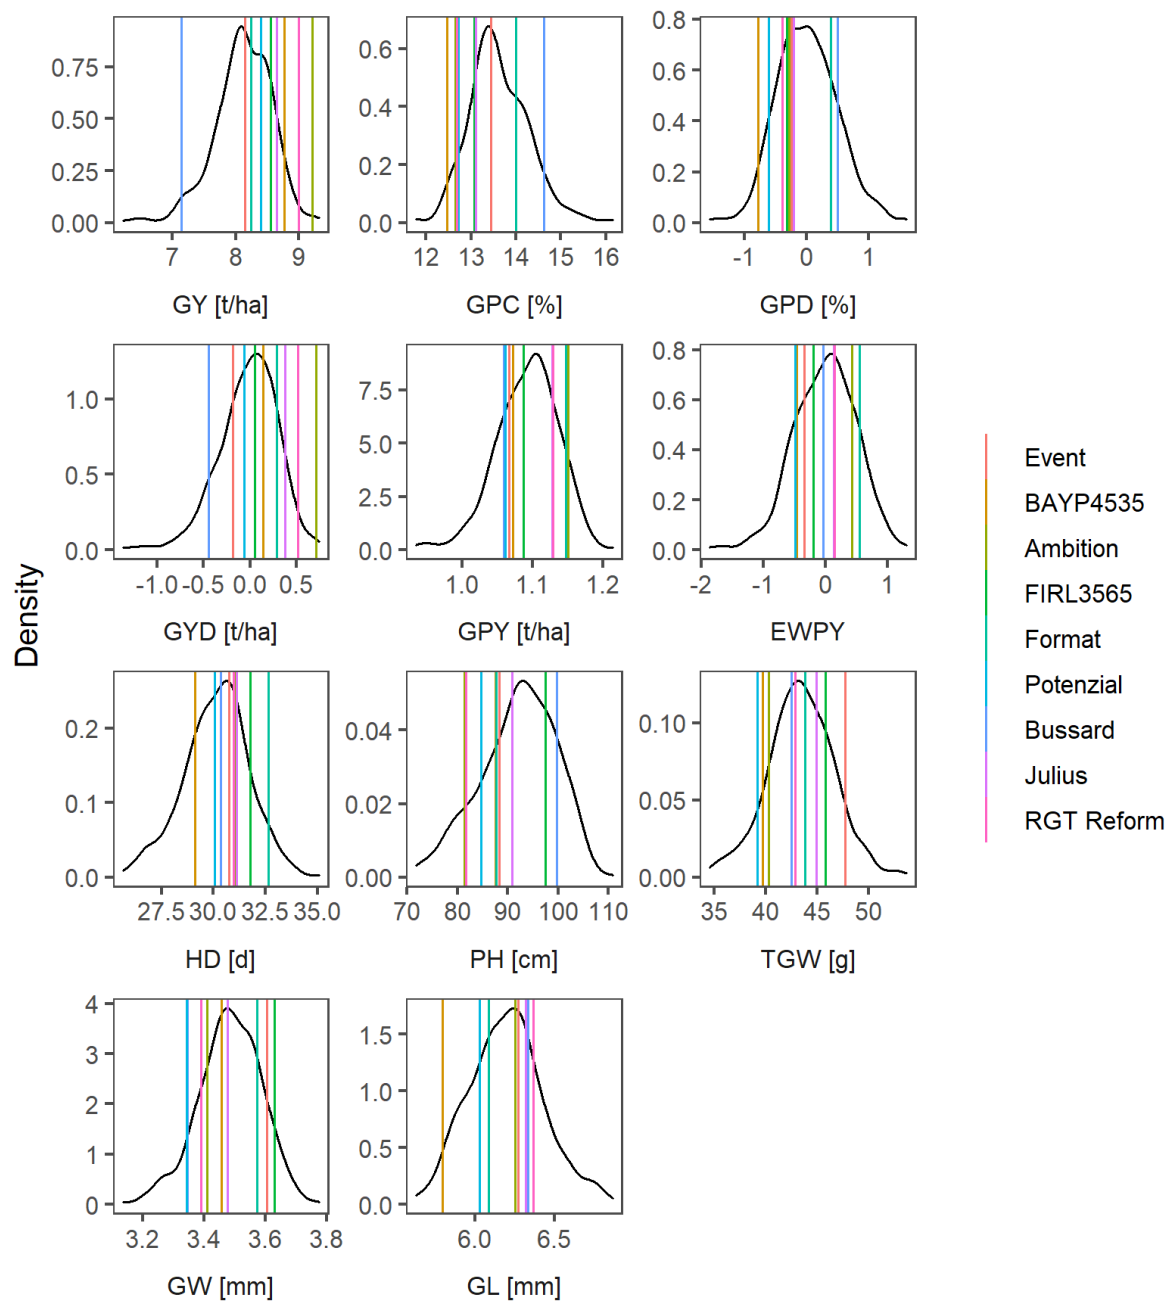

**Figure S1:** Distribution of adjusted means in the BMWpop for the traits grain yield (GY), grain protein content (GPC), grain protein deviation (GPD), grain yield deviation (GYD), grain protein yield (GPY), equal-weight protein yield (EWPY), heading date (HD), plant height (PH), thousand-grain weight (TGW), grain width (GW) and grain length (GL).
