# Supplementary material for: Genetics of the Inverse Relationship between Grain Yield and Grain Protein Content in Common Wheat
Source: Plants (Basel). 2022 Aug 18;11(16):2146. doi: 10.3390/plants11162146 (PMC9413592; doi:10.3390/plants11162146)
Supplement: Supplementary file 1 [file plants-11-02146-s001.zip]

Archive with 5 entries (5 files):
- Figure_S1.pdf
- Table_S1.csv
- Table_S2.csv
- Table_S3.csv
- Table_S4.csv
