# Supplementary material for: Genetics of the Inverse Relationship between Grain Yield and Grain Protein Content in Common Wheat
Source: Plants (Basel). 2022 Aug 18;11(16):2146. doi: 10.3390/plants11162146 (PMC9413592; doi:10.3390/plants11162146)
Supplement: Supplementary file 1 [file plants-11-02146-s001.zip › Table_S1.csv]

Table S1: QTL detected within and across environments: genetic position, flanking markers, p-value, explained variance, maximal effect, and centred effects of eight founder haplotypes. QTL between markers are denoted by “loc”, followed by the position in centimorgans. Some founder effects could not be estimated (NA) because the founder probability did not reach the threshold.
Trait_Trial	QTL	Chr	Pos	SI_lower	SI_upper	LeftMrk	RightMrk	NextMrk	p_value	R2	Effect_MAX	Event	BAYP4535	Ambition	FIRL3565	Format	Potenzial	Bussard	Julius
HD	loc333	1B	333	324	345	BS00060686_51	Excalibur_rep_c69522_83	Excalibur_rep_c69522_83	7.45E-09	0.037926285	1.596548244	-0.075283865	-0.014622068	-0.311851466	0.408330207	-0.877174314	0.389351634	0.71937393	-0.238124058
HD	Excalibur_c17655_467	3A	214.5337063	209.4298689	223	AX-95013434	Kukri_rep_c69970_717	Excalibur_c17655_467	4.91E-05	0.048882981	1.630011473	NA	-0.347697334	0.445258862	0.962156235	0.471987875	-0.51289728	-0.350953119	-0.667855238
HD	wsnp_JD_c1549_2185341	4B	116.6934491	110	124	AX-94648607	RAC875_c1052_94	wsnp_JD_c1549_2185341	4.05E-08	0.061119106	1.236945114	0.084570789	0.010292756	NA	-0.747905499	0.489039616	0.034063081	0.385745876	-0.25580662
HD	IAAV6078	5B	103.7906901	96.17426881	105.8058591	Excalibur_c4031_1227	wsnp_JD_c9613_10432955	IAAV6078	5.70E-09	0.099415091	1.669086684	0.782496315	0.734631125	-0.061485059	-0.886590369	0.363172443	-0.225974522	-0.211217184	-0.495032749
HD	loc70	6D	70	63	78	wsnp_Ra_c13881_21836489	AX-94413387	wsnp_Ra_c13881_21836489	1.59E-08	0.016122207	0.726735219	NA	0.496154288	NA	-0.116530656	-0.200562271	-0.230580931	0.05151957	NA
HD	loc94	7A	94	91.18543206	102	RAC875_c75528_355	Tdurum_contig99143_205	RAC875_c75528_355	6.51E-09	0.086291325	1.644494421	-0.340650517	0.907510464	-0.354207704	-0.736983957	0.500165231	0.130452997	-0.524547627	0.418261113
HD_FK16	AX-95218695	3A	212.5236391	210	223	BS00048355_51	AX-95168510	AX-95218695	1.58E-05	0.061580781	2.474280998	NA	-0.563893746	0.614878895	1.525689166	0.545681228	-0.541203393	-0.632560318	-0.948591832
HD_FK16	IAAV6078	5B	103.7906901	93.66168485	105.8058591	Excalibur_c4031_1227	wsnp_JD_c9613_10432955	IAAV6078	4.16E-05	0.068758574	2.204764871	1.34521414	0.501449369	-0.31479549	-0.859550731	0.387606681	-0.297252385	-0.29242654	-0.470245044
HD_FK16	loc70	6D	70	69	78	wsnp_Ra_c13881_21836489	AX-94413387	wsnp_Ra_c13881_21836489	1.06E-05	0.01703035	0.88318255	NA	0.560183966	NA	-0.129946994	-0.177990334	-0.322998584	0.070751946	NA
HD_FK16	loc94	7A	94	91.18543206	104	RAC875_c75528_355	Tdurum_contig99143_205	RAC875_c75528_355	6.54E-06	0.072221608	1.863725298	-0.3639176	1.089414443	-0.414757909	-0.774310854	0.496816038	0.214356831	-0.60504106	0.357440111
HD_GL17	loc40	2A	40	34	53.47436158	AX-95177447	AX-94516947	AX-94516947	1.21E-05	0.052072458	1.865675484	0.673338851	0.214768218	0.009625079	0.144466922	0.097346704	-1.192336633	-0.226256733	0.279047592
HD_MR17	AX-94443369	5B	272.8450176	266.7371218	276	BobWhite_c26082_239	D_GDEEGVY01AU4CW_149	AX-94443369	4.99E-06	0.06294255	1.622785132	-0.058734489	-0.196228856	-0.43795615	-0.270738832	-0.337770239	1.184828982	0.195655871	-0.079056287
HD_FD18	Excalibur_rep_c69522_83	1B	334.0254739	327	345	BS00060686_51	AX-94860684	Excalibur_rep_c69522_83	2.69E-05	0.039299253	1.081206121	-0.038678922	-0.120907884	-0.275470138	0.374532587	-0.425157591	0.200997894	0.65604853	-0.371364477
HD_FD18	AX-94814435	3B	99.36127703	92.75108362	102	RFL_Contig3455_629	AX-94960570	AX-94814435	3.51E-06	0.063693097	1.586463265	0.475244769	0.210220919	-0.946324961	0.013700908	0.640138304	-0.303420528	0.172586644	-0.262146054
HD_FD18	BS00094771_51	4B	120.2418866	118.7189263	121.764847	AX-94633577	BobWhite_c20051_53	BS00094771_51	3.99E-06	0.057700129	1.241167749	0.108445395	0.001295604	NA	-0.643450617	0.344384335	0.033555109	0.597717131	-0.441946958
HD_FD18	RAC875_c48885_107	5A	300.6631528	295	300.6631528	AX-94492644	NA	RAC875_c48885_107	1.18E-06	0.076911191	1.267577544	-0.272078485	-0.306718713	0.572307952	0.292315339	0.57684502	0.43703856	-0.690732524	-0.608977147
HD_FD18	AX-94573292	7A	121.209796	113	131.5313085	RAC875_c67063_984	AX-94530737	AX-94573292	2.93E-05	0.068850195	1.254331876	-0.251513173	0.77055222	-0.483779656	-0.265622569	0.330723277	-0.048909799	-0.335508345	0.284058045
HD_GL18	loc324	1B	324	313	329	AX-94730675	BS00060686_51	BS00060686_51	1.45E-06	0.042979742	1.852012112	8.21E-05	-0.245157155	-0.186237642	-0.029080177	-0.945714538	0.906297575	0.41178432	0.088025555
HD_GL18	loc38	2A	38	33	48	AX-95177447	AX-94516947	AX-94516947	1.83E-05	0.036954231	1.812528676	0.685650617	0.219037305	-0.176040975	0.166752504	0.194348096	-1.126878059	0.015737371	0.021393142
HD_GL18	BS00063300_51	3A	229.653659	225	234	RAC875_c47550_437	AX-94666858	BS00063300_51	2.25E-11	0.092945472	1.558157336	-0.761112164	0.033691257	0.797045171	0.787045663	0.602833345	-0.633128185	-0.238225857	-0.58814923
HD_GL18	loc208	5A	208	206	220	Tdurum_contig44343_1039	wsnp_Ex_c27046_36265198	Tdurum_contig44343_1039	1.20E-05	0.057448278	1.586240619	-0.027550675	0.335007214	0.250803863	-0.012060121	-0.449106339	0.659646293	-0.926594326	0.169854091
HD_GL18	RFL_Contig4162_1757	5B	102.2831398	97.1793024	111	wsnp_Ex_c18654_27528399	RAC875_c35715_718	RFL_Contig4162_1757	3.01E-09	0.127001068	1.720835763	0.112966041	0.74833948	0.527137658	-0.972496282	0.450621713	-0.456523204	-0.101645739	-0.308399666
HD_MR19	Excalibur_rep_c69522_83	1B	334.0254739	327	355.5257587	BS00060686_51	AX-94860684	Excalibur_rep_c69522_83	3.53E-05	0.026161456	1.424393828	-0.072983784	0.019592153	-0.572590707	0.373684428	-0.672952204	0.429129527	0.751441623	-0.255321036
HD_MR19	loc108	4B	108	105	121.764847	BS00034255_51	wsnp_Ra_c18498_27571740	wsnp_Ra_c18498_27571740	1.97E-05	0.029531846	2.093609461	0.070394054	0.56672463	NA	-1.526884831	0.350794406	0.198439324	NA	0.340532417
HD_MR19	loc70	6D	70	62	90	wsnp_Ra_c13881_21836489	AX-94413387	wsnp_Ra_c13881_21836489	4.45E-05	0.018429293	0.985232565	NA	0.664142084	NA	-0.163473079	-0.208877728	-0.321090481	0.029299204	NA
HD_MR19	loc118	7A	118	111.4870931	131	BS00070624_51	RAC875_c67063_984	RAC875_c67063_984	1.37E-05	0.067276455	1.594228581	-0.635896381	0.791878044	-0.802350537	-0.365984241	0.586351836	0.257327434	-0.437839454	0.606513299
HD_HL20	Excalibur_c21663_145	2A	14.40417952	4	19	RFL_Contig174_406	AX-94510523	Excalibur_c21663_145	5.69E-07	0.018383767	2.289248877	-0.145731075	0.533426216	0.089112781	-0.074467767	0.289606445	-1.543201495	0.105207514	0.746047382
HD_HL20	IAAV4595	4B	114.1808651	113.1758316	116.6934491	wsnp_Ra_c15715_24192817	Tdurum_contig98255_84	IAAV4595	1.05E-10	0.088269266	2.071122394	0.037609899	-0.011070124	NA	-1.270676021	0.800446372	0.254386837	0.502803226	-0.313500189
HD_HL20	loc177	4B	177	171.5377531	185	BobWhite_c27751_95	AX-94686448	AX-94686448	8.59E-06	0.023783648	1.27990447	-0.144039845	NA	NA	-0.502153914	0.473866746	-0.450032107	0.777750556	-0.155391436
HD_HL20	RFL_Contig4162_1757	5B	102.2831398	98	105.8058591	wsnp_Ex_c18654_27528399	RAC875_c35715_718	RFL_Contig4162_1757	4.49E-09	0.109348929	2.575714881	1.054334632	0.968623349	0.178639956	-1.521380249	0.57222379	-0.289275433	-0.467973897	-0.495192147
HD_HL20	loc242	5D	242	235	246.2536324	AX-94725628	tplb0031c19_721	tplb0031c19_721	2.21E-08	0.088885625	2.286306745	1.221773305	-1.06453344	0.108435184	0.118819773	-0.463369254	0.078874431	NA	NA
HD_HL20	wsnp_Ex_rep_c70036_68988728	6B	163.7966643	158	165.8118332	BS00023080_51	TA005327.0480	wsnp_Ex_rep_c70036_68988728	4.79E-06	0.010094094	1.420314349	-0.428551166	0.011490806	-0.803098923	0.225434199	0.213873787	0.208335823	0.617215425	-0.044699951
HD_HL20	GENE.3726_860	6D	66.52277588	60	77	GENE.4194_102	IAAV8527	GENE.3726_860	2.82E-06	0.021837456	1.251816373	NA	0.696021507	NA	-0.212493052	-0.555794867	-0.245931454	0.318197867	NA
HD_HL20	loc87	7A	87	84	89	wsnp_BF473884A_Ta_1_3	AX-95254511	wsnp_BF473884A_Ta_1_3	3.51E-09	0.074004065	2.565636156	-0.369453954	1.614359576	-0.508008051	-0.95127658	0.590042509	0.028806416	-0.778174994	0.373705078
PH	AX-94988194	4B	89.39619334	83	95.72540095	BS00074440_51	GENE.2660_237	AX-94988194	4.56E-14	0.10510058	10.94347293	NA	-6.59986118	NA	-2.402701158	2.27223964	1.852811716	4.343611745	0.533899237
PH	TG0011	4D	27.42983261	23	31	AX-95148759	AX-94747406	TG0011	3.94E-51	0.268097712	11.80064847	NA	5.121487838	-3.495783354	NA	5.053456152	NA	NA	-6.679160636
PH	BS00046046_51	6A	159.4011851	148	161	wsnp_Ex_c18965_27868480	BS00022913_51	BS00046046_51	4.42E-18	0.124317128	8.84368971	2.301544435	-1.953370918	-4.224121999	0.105220234	-1.192610323	-3.159067712	4.619567711	3.502838573
PH	wsnp_Ra_c13881_21836489	6D	68.53794483	67.52780946	94	BS00094895_51	AX-94413387	wsnp_Ra_c13881_21836489	3.43E-08	0.028832186	4.24165592	NA	0.400481966	NA	1.705361729	-2.536294191	-0.864583919	1.295034416	NA
PH_FK16	loc66	4B	66	59	78.52892461	RAC875_rep_c106667_302	AX-94434500	AX-94434500	3.45E-09	0.089495462	10.03142953	NA	-6.104582929	NA	0.361093001	3.926846605	0.701308754	1.596556438	-0.481221869
PH_FK16	TG0011	4D	27.42983261	20	33	AX-95148759	AX-94747406	TG0011	1.83E-22	0.143200761	9.837650417	NA	4.36820981	-2.510212587	NA	3.611443383	NA	NA	-5.469440607
PH_FK16	BS00043716_51	6A	144.7663298	141	155	wsnp_Ku_c38451_47086066	Tdurum_contig76709_195	BS00043716_51	8.06E-18	0.018569119	4.666165029	0.454857231	1.697134263	NA	-1.795692764	-2.643203182	-1.298106393	2.022961847	1.562048997
PH_FK16	loc69	6D	69	67.52780946	91	wsnp_Ra_c13881_21836489	AX-94413387	wsnp_Ra_c13881_21836489	1.29E-06	0.033517805	4.561989489	NA	0.554772419	NA	1.848296354	-2.713693136	-1.241485157	1.55210952	NA
PH_GL17	AX-94988194	4B	89.39619334	83	100	BS00074440_51	GENE.2660_237	AX-94988194	1.49E-07	0.066800257	8.652430207	NA	-5.571864357	NA	-2.934229414	2.221450795	2.310115771	3.08056585	0.893961355
PH_GL17	loc29	4D	29	22	34	TG0011	AX-94747406	TG0011	3.34E-22	0.131864386	10.05245937	NA	4.048729388	-2.907044021	NA	4.455386999	NA	NA	-5.597072366
PH_GL17	BS00043716_51	6A	144.7663298	141	155	wsnp_Ku_c38451_47086066	Tdurum_contig76709_195	BS00043716_51	1.59E-14	0.031215841	4.679182171	0.075515967	1.625394298	NA	-2.668593445	-2.972373637	0.816812546	1.416435736	1.706808534
PH_GL17	wsnp_Ra_c13881_21836489	6D	68.53794483	67.52780946	94	BS00094895_51	AX-94413387	wsnp_Ra_c13881_21836489	3.02E-06	0.03084062	5.145488124	NA	0.231731296	NA	2.230667751	-2.914820372	-0.565964023	1.018385348	NA
PH_MR17	AX-94988194	4B	89.39619334	83	95.72540095	BS00074440_51	GENE.2660_237	AX-94988194	5.86E-13	0.067202356	9.244350836	NA	-6.17951111	NA	-0.392687953	1.333737618	1.824402718	3.064839726	0.349219001
PH_MR17	TG0011	4D	27.42983261	24	30	AX-95148759	AX-94747406	TG0011	7.70E-67	0.345132624	13.96488657	NA	6.052319342	-3.974381348	NA	5.834629233	NA	NA	-7.912567227
PH_MR17	loc159	6A	159	149	162	wsnp_Ex_c18965_27868480	BS00046046_51	wsnp_Ex_c18965_27868480	8.17E-12	0.081739662	7.064819545	2.035199128	-1.8729723	-3.290215335	0.383989385	-1.831506107	-2.268816495	3.774604209	3.069717516
PH_MR17	loc85	6D	85	67.52780946	96	AX-94413387	GENE.4178_89	AX-94413387	1.13E-06	0.012751343	5.434292835	NA	NA	NA	1.09779334	-3.099269166	-0.333547843	2.335023669	NA
PH_FD18	Excalibur_c21663_145	2A	14.40417952	1	19	RFL_Contig174_406	AX-94510523	Excalibur_c21663_145	1.07E-05	0.03667789	8.496327661	0.146553299	-0.631021953	-1.065559995	3.530451681	1.368831371	-4.965875981	-0.345209936	1.961831514
PH_FD18	loc91	4B	91	85	98	GENE.2660_237	RAC875_c15872_141	GENE.2660_237	3.87E-08	0.073364869	8.336944309	NA	-5.578963514	NA	0.125376365	1.89412842	0.360495357	2.757980795	0.440982577
PH_FD18	Excalibur_c42450_727	4B	126.3029082	104.271579	144	AX-94842990	Ex_c32540_659	Excalibur_c42450_727	5.54E-07	0.018141372	4.196224831	-0.862060505	NA	NA	-1.632698018	2.563526813	-0.612099603	1.579997025	-1.036665712
PH_FD18	loc30	4D	30	17	37	TG0011	AX-94747406	TG0011	6.12E-19	0.139444888	9.328016584	NA	3.329141134	-2.060650435	NA	4.029762943	NA	NA	-5.298253641
PH_FD18	loc158	6A	158	148	161	Tdurum_contig76709_195	IACX170	IACX170	2.45E-13	0.086833806	7.897151288	1.502956702	-1.279090516	-3.873957513	-0.578505809	0.272694426	-2.861283863	4.023193775	2.793992798
PH_FD18	wsnp_Ra_c13881_21836489	6D	68.53794483	63	79	BS00094895_51	AX-94413387	wsnp_Ra_c13881_21836489	5.36E-08	0.065137001	5.308653691	NA	1.18417904	NA	2.388220892	-2.9204328	-1.940852371	1.288885239	NA
PH_SL18	AX-94988194	4B	89.39619334	81	100	BS00074440_51	GENE.2660_237	AX-94988194	4.44E-16	0.123273025	15.43727109	NA	-8.804966293	NA	-5.459785104	3.222683278	3.215535399	6.632304797	1.194227923
PH_SL18	TG0011	4D	27.42983261	23	31	AX-95148759	AX-94747406	TG0011	4.72E-62	0.308530314	15.75205976	NA	7.129370316	-5.576420072	NA	7.0697392	NA	NA	-8.622689445
PH_SL18	BS00022913_51	6A	159.9037019	149	162	BS00046046_51	wsnp_Ex_c19454_28409258	BS00022913_51	9.44E-15	0.104230134	11.43634604	3.145759363	-2.32779429	-5.917765958	0.861718174	-1.368787109	-4.106335578	5.518580083	4.194625316
PH_SL18	wsnp_Ra_c13881_21836489	6D	68.53794483	67.02529267	97	BS00094895_51	AX-94413387	wsnp_Ra_c13881_21836489	8.31E-07	0.023121688	5.298063045	NA	0.448929621	NA	2.352662786	-2.945400259	-1.269358759	1.413166612	NA
PH_HL20	AX-94988194	4B	89.39619334	80.03647498	100	BS00074440_51	GENE.2660_237	AX-94988194	3.35E-17	0.108970334	12.56849756	NA	-7.628310226	NA	-2.563981848	2.313865455	1.814868024	4.940187336	1.123371259
PH_HL20	loc26	4D	26	22	30	AX-95148759	TG0011	TG0011	2.68E-82	0.442509058	15.81020691	NA	6.807232711	-5.955732941	NA	7.47935357	NA	NA	-8.330853339
PH_HL20	loc156	6A	156	145	162	Tdurum_contig76709_195	IACX170	Tdurum_contig76709_195	6.27E-12	0.075055626	8.030837132	1.772135203	-2.80408917	-3.704472547	0.719868614	-2.087145333	-1.750341409	4.326364585	3.527680057
PH_SL21	AX-94479553	3A	270.8214043	262	280	BS00081475_51	Tdurum_contig42495_389	AX-94479553	4.27E-05	0.059296861	6.405780352	1.627317824	1.798091852	-0.301059355	1.810131978	0.592569934	-4.595648375	0.136788351	-1.068192209
PH_SL21	AX-94988194	4B	89.39619334	82	95	BS00074440_51	GENE.2660_237	AX-94988194	3.78E-13	0.107736384	9.579106736	NA	-5.960456212	NA	-2.053360189	2.598499925	2.258933252	3.618650524	-0.462267299
PH_SL21	TG0011	4D	27.42983261	22	31	AX-95148759	AX-94747406	TG0011	2.48E-31	0.180186713	10.5366551	NA	3.961654007	-2.517010035	NA	4.546005566	NA	NA	-5.990649538
PH_SL21	BS00046046_51	6A	159.4011851	148	161	wsnp_Ex_c18965_27868480	BS00022913_51	BS00046046_51	6.90E-18	0.132771484	9.802344018	2.38841499	-1.335038274	-5.181737753	0.240537987	-0.436474249	-3.853476	4.620606265	3.557167034
PH_SL21	loc85	6D	85	68	96	AX-94413387	GENE.4178_89	AX-94413387	5.65E-08	0.036614203	6.323716806	NA	NA	NA	1.206179679	-3.462361774	-0.605172938	2.861355032	NA
GY	GENE.1792_560	2A	139.5975465	137	143	BS00090569_51	BS00022377_51	GENE.1792_560	9.51E-09	0.096097119	0.721842648	-0.573498976	0.015359199	0.094843747	0.086803217	0.139809705	0.148343673	0.040911736	0.047427699
GY	Excalibur_c22830_1989	4A	183.5732305	176	184.5833659	AX-94695204	Excalibur_c23921_738	Excalibur_c22830_1989	7.42E-07	0.080179288	0.598823723	-0.03454551	-0.371589291	0.227234432	-0.001807035	0.055846074	0.017322397	-0.010945389	0.118484322
GY	loc99	5A	99	89.10451447	109	AX-94732470	Kukri_c41797_393	AX-94732470	3.75E-06	0.056974773	0.434012476	-0.172350493	0.030934274	-0.052213881	-0.126458216	-0.056945145	-0.059430532	0.17480201	0.261661984
GY	Tdurum_contig28268_91	5B	126.6789553	124	137	AX-94746298	wsnp_Ex_c5155_9140608	Tdurum_contig28268_91	5.86E-06	0.056371105	0.471519095	-0.007680525	-0.290148619	-0.051777225	0.091916506	0.181370476	-0.035164182	-0.044207278	0.155690848
GY	AX-94507146	6A	44.52227551	40.48673117	50	Tdurum_contig75595_586	BobWhite_c13839_78	AX-94507146	9.19E-07	0.038648441	0.366116022	-0.225155388	-0.068041169	-0.015312605	0.094247342	0.140960634	-0.066554617	0.058768721	0.081087083
GY	loc245	6B	245	235.1268834	249.8457067	RAC875_c41444_939	wsnp_Ex_c45713_51429315	RAC875_c41444_939	2.04E-06	0.036526798	0.399194295	-0.160789262	-0.103616818	0.093336149	-0.034430669	0.238405033	NA	-0.004647784	-0.028256648
GY_FK16	GENE.1792_560	2A	139.5975465	137	143	BS00090569_51	BS00022377_51	GENE.1792_560	2.67E-06	0.083320276	1.151560531	-0.905047681	0.200810829	0.24651285	0.039230525	0.245060396	0.024012007	0.013091459	0.136329616
GY_FK16	RAC875_c45987_132	6B	239.6805671	232	249.8457067	AX-95143298	AX-94537957	RAC875_c45987_132	2.39E-05	0.070324166	0.649726571	-0.245744983	-0.237904779	0.402421192	-0.247305379	0.364126694	0.012204648	-0.119676617	0.071879223
GY_RG16	BobWhite_rep_c64680_305	2A	105.5232041	100	116	AX-94705914	Excalibur_c74304_642	BobWhite_rep_c64680_305	2.59E-05	0.043483972	0.887804433	-0.224542379	0.208323805	0.05503731	0.29954674	-0.473326319	-0.097614863	-0.181902409	0.414478114
GY_RG16	loc53	4D	53	42	57.61836914	AX-94604977	AX-94483885	AX-94604977	6.89E-11	0.102024295	1.164607863	NA	0.21943084	-0.246000107	NA	0.205649165	-0.671843881	NA	0.492763982
GY_GL17	BS00022377_51	2A	140.1000633	133	144	GENE.1792_560	AX-94860603	BS00022377_51	1.76E-05	0.069875589	1.004544829	-0.689512911	-0.081816443	0.127082303	-0.049255427	0.315031919	0.19575154	0.150872176	0.031846842
GY_GL17	Excalibur_c22830_1989	4A	183.5732305	178	184.5833659	AX-94695204	Excalibur_c23921_738	Excalibur_c22830_1989	2.62E-05	0.0622641	0.889315484	-0.012964865	-0.498023455	0.391292029	-0.019747835	0.075700744	0.052259662	-0.075241682	0.086725401
GY_MR17	loc73	1B	73	69	75	wsnp_RFL_Contig4726_5654774	Excalibur_c6497_535	wsnp_RFL_Contig4726_5654774	2.42E-11	0.102454822	0.573418155	0.094743968	-0.001297061	-0.398858946	0.07086603	0.174559208	0.049548226	0.041455792	-0.031017216
GY_MR17	wsnp_Ra_c16476_25132652	4A	134.5167445	127	138.5573906	Kukri_rep_c109167_89	RAC875_c17197_504	wsnp_Ra_c16476_25132652	1.22E-06	0.101675886	0.490966487	-0.02063816	-0.211814419	0.003557558	-0.260099376	0.084874049	0.223434284	-0.050181049	0.230867111
GY_MR17	IACX170	6A	158.3961515	148	164	Tdurum_contig76709_195	wsnp_Ex_c18965_27868480	IACX170	2.33E-08	0.103097901	0.43263091	-0.198112222	0.206340964	-0.14036023	0.214240078	0.029662246	0.234518688	-0.191972653	-0.154316871
GY_MR17	loc48	6B	48	42	56	BS00003891_51	AX-94779724	AX-94779724	9.15E-06	0.060418669	0.547284847	-0.031050503	-0.24696995	0.076403122	0.066488491	0.113679017	-0.072126594	-0.206738479	0.300314896
GY_MR17	loc172	6B	172	165.3093164	184	wsnp_Ku_c4910_8793327	BS00068245_51	BS00068245_51	2.68E-05	0.04498255	0.39297654	-0.004739202	-0.060228386	0.173995452	0.033490801	0.186393274	-0.13893149	0.016602817	-0.206583266
GY_MR17	loc364	7A	364	349	368	wsnp_CAP11_rep_c4346_2050918	IACX13137	IACX13137	7.47E-07	0.023082459	0.315178289	0.015706188	-0.043344649	0.11353035	-0.010170691	-0.101741779	0.032486613	-0.160822161	0.154356129
GY_FD18	BobWhite_c13373_250	2A	0.502516793	0	11	wsnp_Ex_c11950_19164191	wsnp_Ku_c23598_33524490	BobWhite_c13373_250	6.86E-09	0.034241904	0.940037711	0.171589611	2.79E-05	0.213113622	0.243898056	0.02582596	-0.696139655	-0.064846773	0.106531322
GY_FD18	loc138	2A	138	133	143	BS00090569_51	GENE.1792_560	BS00090569_51	2.83E-07	0.059430038	0.824891979	-0.531690762	-0.140272361	0.032902138	0.133505643	0.055050227	0.293201217	0.162307077	-0.005003178
GY_FD18	Excalibur_c13811_1086	4A	168.5136645	167.0010123	174	Tdurum_contig75819_1220	AX-94494720	Excalibur_c13811_1086	2.68E-06	0.094096189	0.901175025	0.10304534	-0.49371811	0.032210652	-0.018697774	-0.113840697	0.091884395	-0.00834072	0.407456915
GY_FD18	loc84	7A	84	83	95	Tdurum_contig82438_73	wsnp_BF473884A_Ta_1_3	Tdurum_contig82438_73	4.18E-05	0.075952469	0.843402331	-0.178233838	0.531407685	0.107891369	-0.09981021	0.086936996	0.051175824	-0.311994646	-0.187373179
GY_SL18	Excalibur_c22830_1989	4A	183.5732305	173	188	AX-94695204	Excalibur_c23921_738	Excalibur_c22830_1989	2.38E-08	0.111348021	1.074537293	-0.004570633	-0.699032829	0.199545309	-0.00121781	0.042292276	0.021414984	0.066064239	0.375504464
GY_SL18	loc325	7A	325	320.4755663	332	wsnp_Ku_c19251_28705893	TA002938.0337	wsnp_Ku_c19251_28705893	3.86E-05	0.054040834	1.031485098	-0.602039038	0.088081173	0.019274186	NA	0.42944606	-0.066007182	-0.136919573	0.268164373
GY_MR19	BS00035273_51	1A	216.0881647	213	220	AX-94788925	wsnp_Ex_rep_c72011_70562321	BS00035273_51	6.90E-06	0.014163629	0.328889481	-0.114482185	-0.049954967	0.013927101	0.023273707	0.042831768	0.195548158	-0.133341324	0.022197742
GY_MR19	wsnp_JD_rep_c48914_33168544	2A	65.16690545	62.60224073	70	BS00066186_51	Excalibur_rep_c105284_110	wsnp_JD_rep_c48914_33168544	3.11E-05	0.015149856	0.28727107	-0.192625979	-0.011875565	0.00914015	0.08273158	-0.089000421	0.033575133	0.073410013	0.09464509
GY_MR19	loc112	3A	112	111	132	wsnp_Ku_c44089_51445136	Ku_c17569_905	wsnp_Ku_c44089_51445136	1.28E-07	0.044130163	0.718028292	-0.093510428	0.571427381	-0.010548299	-0.146600911	-0.139021709	-0.054031768	-0.03620342	-0.091510846
GY_MR19	loc108	5A	108	104	114	wsnp_Ex_c19647_28632894	IAAV2363	wsnp_Ex_c19647_28632894	1.19E-12	0.166734908	0.610439277	-0.3074677	0.064952616	-0.021981329	-0.231871299	-0.078631492	0.041825869	0.230201756	0.302971578
GY_MR19	IAAV6078	5B	103.7906901	92.15413447	111	Excalibur_c4031_1227	wsnp_JD_c9613_10432955	IAAV6078	4.00E-06	0.105072692	0.529399273	-0.14729113	-0.325233217	-0.067555164	0.204166056	0.114277751	0.055557492	-0.012142599	0.178220812
GY_MR19	AX-94779724	6B	48.11465045	38	57	BS00003891_51	Kukri_c8343_228	AX-94779724	6.55E-08	0.077440974	0.457032318	-0.094511388	-0.228188148	0.140540988	0.12203914	0.048455175	-0.048979344	-0.168200592	0.22884417
GY_MR19	wsnp_Ku_c4910_8793327	6B	168.8790147	165.3093164	179	RAC875_c22442_213	BS00068245_51	wsnp_Ku_c4910_8793327	5.42E-05	0.049118376	0.33900818	-0.065750432	-0.054402468	0.121081551	0.145700097	0.13450706	-0.141080006	0.053252281	-0.193308082
GY_MR19	wsnp_Ex_c45713_51429315	6B	245.3179538	235.6294002	249.8457067	RAC875_c41444_939	RAC875_c2910_1562	wsnp_Ex_c45713_51429315	1.47E-12	0.040687471	0.451837182	-0.187298758	-0.082660616	-0.033558799	0.264538424	0.247038296	NA	-0.085516478	-0.122542069
GY_MR19	AX-94573292	7A	121.209796	116	131	RAC875_c67063_984	AX-94530737	AX-94573292	1.68E-07	0.063819542	0.428756791	0.179479342	0.021921031	0.173780225	0.058055211	-0.021491007	-0.080633553	-0.081833799	-0.24927745
GY_HL20	TG0010	4B	74.90038996	71	80.53899178	Tdurum_contig81797_369	BS00022258_51	TG0010	1.42E-09	0.103560986	0.865244403	NA	0.543443687	NA	-0.164376226	0.12432363	-0.321800716	-0.209517797	0.027927421
GY_HL20	RAC875_rep_c76650_164	4D	6.963103367	0	17	BS00099053_51	Excalibur_c26088_184	RAC875_rep_c76650_164	9.87E-07	0.007196225	0.262067471	NA	-0.107919677	0.154147794	NA	-0.046228117	NA	NA	NA
GY_HL20	AX-95133112	7A	53.99041471	45.64093637	62	AX-94649056	BobWhite_rep_c58252_112	AX-95133112	8.27E-07	0.085832561	0.822941497	-0.115984963	0.543338496	0.054362853	-0.111296333	0.235030741	-0.126771667	-0.199076126	-0.279603001
GY_HL20	AX-95097572	7A	132.5414439	122.2148296	142.9109897	AX-95090243	BS00033442_51	AX-95097572	3.63E-06	0.06846473	0.619332927	0.056253118	0.181003586	0.042416724	0.14586565	0.099932481	-0.037644795	-0.049497424	-0.438329341
GY_SL21	loc93	1B	93	87	99.60938755	AX-94433968	Kukri_c84940_106	AX-94433968	4.08E-05	0.020283899	0.388023775	0.116990909	-0.257828003	0.098446312	0.130195772	-0.044145609	-0.011025845	-0.032633537	NA
GY_SL21	AX-94530737	7A	121.7123128	111.4870931	131.5313085	AX-94573292	wsnp_Ex_c39221_46569987	AX-94530737	7.84E-06	0.06665522	0.527386379	0.148691896	0.130720658	0.244624547	0.00916979	-0.100087499	-0.037139859	-0.113217701	-0.282761832
GY_SL21	loc8	7D	8	0	17	AX-94918455	BS00022449_51	AX-94918455	2.46E-06	0.06152051	0.505247124	NA	-0.282766317	NA	NA	0.222480807	-0.186198606	0.143880424	0.102603692
TGW	AX-94665408	2A	125.3338156	121.7851655	136.5037763	AX-95180124	BS00055514_51	AX-94665408	1.59E-09	0.054199851	3.329719692	-1.833214353	0.168450665	-0.924847135	0.333269801	0.265112756	0.508838153	-0.014115226	1.496505339
TGW	RAC875_c5080_915	2B	178.765545	168.6484674	188.8620062	Kukri_c48787_108	Ku_c6546_718	RAC875_c5080_915	4.93E-05	0.065556488	2.681904983	0.681880795	1.256478892	NA	NA	0.197032861	-0.102208689	-1.425426091	-0.607757768
TGW	loc25	4D	25	17	38	AX-95148759	TG0011	TG0011	2.04E-07	0.127135179	3.738825258	NA	1.539159962	-1.272202033	NA	1.735933664	NA	NA	-2.002891593
TGW	loc130	6A	130	128.7115863	134	TA005366.0788	Ra_c14408_576	TA005366.0788	5.24E-09	0.027203406	5.646501623	0.736106721	-3.80583698	NA	0.666865817	-0.438421551	NA	1.840664643	1.000621349
TGW_FK16	loc133	2A	133	122	138	AX-94436530	AX-95661975	AX-94436530	3.15E-07	0.095906316	5.129012347	-2.33717698	1.237240678	-0.258376554	0.620979902	-0.49377649	-0.60081239	-0.959913533	2.791835367
TGW_FK16	wsnp_Ex_c55735_58127324	2B	196.4879732	189	207	wsnp_Ex_c17845_26604587	AX-94388449	wsnp_Ex_c55735_58127324	3.43E-05	0.074713271	3.15557773	NA	2.301534344	NA	NA	-0.854043386	-0.363195909	-0.81142515	-0.272869899
TGW_FK16	TG0011	4D	27.42983261	17	38	AX-95148759	AX-94747406	TG0011	1.24E-05	0.066076209	3.71099769	NA	1.624118417	-1.146638785	NA	1.609399642	NA	NA	-2.086879274
TGW_FK16	IAAV1971	7A	90.68291527	84	96.8071962	wsnp_Ex_c24400_33645206	AX-95203408	IAAV1971	3.67E-05	0.044518273	2.886580594	0.291130003	-1.028509236	1.06990636	1.349793924	-1.525230074	-0.343029429	1.361350519	-1.175412068
TGW_FK16	wsnp_JD_c20555_18262317	7A	320.4755663	311	323.5427478	Excalibur_c95707_285	tplb0045p11_893	wsnp_JD_c20555_18262317	3.14E-08	0.073933181	3.582885783	-1.876664154	1.706221629	1.399119441	NA	-0.498336913	-1.099740739	-1.253849088	1.623249824
TGW_GL17	loc133	2A	133	122	142	AX-94436530	AX-95661975	AX-94436530	2.01E-06	0.082625045	5.470348749	-3.485934213	0.491971899	-0.482589049	0.552092689	0.373794254	0.770226972	-0.203977087	1.984414535
TGW_GL17	loc179	2B	179	168.6484674	186.8468372	RAC875_c5080_915	Ku_c6546_718	RAC875_c5080_915	3.55E-05	0.047926762	3.974878586	1.275586366	1.55267543	NA	NA	0.590566104	0.04958774	-1.046212484	-2.422203156
TGW_GL17	loc25	4D	25	17	38	AX-95148759	TG0011	TG0011	6.99E-07	0.096864493	4.091598953	NA	1.47468314	-1.235771476	NA	1.926343645	NA	NA	-2.165255308
TGW_GL17	loc130	6A	130	129	134	TA005366.0788	Ra_c14408_576	TA005366.0788	1.55E-09	0.04366843	6.967034149	0.763519885	-4.565011371	NA	0.85207616	-0.518494701	NA	2.402022779	1.065887248
TGW_FD18	Tdurum_contig91519_224	2B	181.7857475	171.6943881	184.8213601	BobWhite_c10215_242	BobWhite_c16735_131	Tdurum_contig91519_224	4.13E-08	0.067989978	6.626102009	3.640697782	0.359058533	NA	NA	-0.589601617	-0.795130579	-2.985404226	0.370380107
TGW_FD18	loc259	5B	259	249	266	AX-95241557	Excalibur_c17489_804	Excalibur_c17489_804	2.50E-05	0.028878774	2.940745052	1.273644943	-1.051422447	-0.026127114	0.682356734	1.672093536	-1.268651517	-0.712597218	-0.569296917
TGW_FD18	Tdurum_contig76709_195	6A	155.3023814	145	166	BS00043716_51	IACX170	Tdurum_contig76709_195	8.39E-06	0.042061695	5.162290986	0.522184758	0.502180078	-2.842072072	0.6377197	-0.814658682	-0.883547047	2.320218915	0.557974351
TGW_FD18	loc94	7A	94	89.17026311	101	RAC875_c75528_355	Tdurum_contig99143_205	RAC875_c75528_355	2.52E-06	0.074903456	3.584378257	0.219270997	-0.548018683	1.483452644	1.770133566	-1.814244691	-0.70930066	0.942870101	-1.344163275
TGW_SL18	loc192	2B	192	181.2832307	202	Excalibur_rep_c66577_159	wsnp_Ex_rep_c67543_66165372	Excalibur_rep_c66577_159	1.42E-06	0.086918775	8.544126952	5.874946135	0.365972142	NA	NA	-0.748010276	-1.36617364	-2.669180817	-1.457553543
TGW_SL18	loc75	4B	75	70.81276487	85	TG0010	BS00022258_51	TG0010	6.28E-07	0.052393372	3.280632493	NA	-2.331647783	NA	0.223175931	0.94898471	0.752734461	0.210870386	0.195882295
TGW_SL18	loc31	4D	31	18	38	TG0011	AX-94747406	TG0011	2.20E-11	0.177015188	4.82180018	NA	2.434921323	-2.386878857	NA	2.322558654	NA	NA	-2.370601121
TGW_SL18	BS00046046_51	6A	159.4011851	145	165	wsnp_Ex_c18965_27868480	BS00022913_51	BS00046046_51	2.81E-06	0.059744306	4.318217453	0.505242367	-0.35315154	-2.373606589	0.667115677	-0.438042387	-1.079490501	1.944610864	1.127322109
TGW_SL18	loc215	7A	215	206.0677439	225	Kukri_c42807_473	AX-95195962	Kukri_c42807_473	2.20E-06	0.059537765	2.717847521	-0.958798216	1.465134277	-0.680865397	0.463158846	-1.252713244	1.044866608	0.489949528	-0.570732403
TGW_MR19	loc142	2A	142	133	146.1972191	BS00022377_51	AX-94860603	AX-94860603	4.11E-05	0.067971103	4.596234242	-3.16052176	0.176276032	-0.459229143	0.680450123	1.435712482	0.683932787	-0.620725912	1.26410539
TGW_MR19	Ra_c68109_376	2B	200.5652901	189	205	IAAV5675	Excalibur_c11392_1193	Ra_c68109_376	2.66E-07	0.056453401	2.825879163	NA	1.204825897	NA	NA	0.392074671	-0.119807838	-1.621053266	0.143960537
TGW_MR19	BS00094771_51	4B	120.2418866	110	131	AX-94633577	BobWhite_c20051_53	BS00094771_51	4.53E-06	0.056013184	3.465258891	-0.504877433	-2.033088807	NA	0.960604134	1.432170085	-1.173958709	0.933251573	0.385899157
TGW_MR19	loc24	4D	24	17	32	AX-95148759	TG0011	TG0011	7.68E-20	0.172149789	4.63431476	NA	1.917896632	-1.621495186	NA	2.168956657	NA	NA	-2.465358103
TGW_MR19	AX-95203408	7A	91.18543206	87	98.82236516	IAAV1971	BobWhite_c34551_714	AX-95203408	5.86E-07	0.07742086	3.27165442	-0.117374062	-0.411890334	0.923489811	1.91205569	-1.35959873	-0.535807475	0.656971687	-1.067846587
TGW_HL20	AX-94665408	2A	125.3338156	120.2622052	134	AX-95180124	BS00055514_51	AX-94665408	1.24E-08	0.069940152	3.524755091	-2.127103325	-0.448867774	-1.215588097	0.850043381	0.137666044	1.171207591	0.234990414	1.397651766
TGW_HL20	AX-94401657	2B	194.4728042	184	205	wsnp_Ex_rep_c67543_66165372	wsnp_Ex_c114_229879	AX-94401657	3.02E-06	0.10592883	7.242709382	4.596981436	0.795536508	NA	NA	-0.174900054	-1.263700278	-2.645727946	-1.308189666
TGW_HL20	loc26	4D	26	17	38	AX-95148759	TG0011	TG0011	5.89E-10	0.134085962	4.316016095	NA	1.850078133	-1.224428228	NA	1.840288057	NA	NA	-2.465937962
TGW_SL21	loc147	2A	147	140.1000633	153	wsnp_CAP8_c2677_1394934	Tdurum_contig33398_106	wsnp_CAP8_c2677_1394934	9.29E-06	0.062400235	3.920667034	-1.923945641	-0.010440403	-0.18271941	-0.088195303	0.667885308	-0.223792694	-0.235513252	1.996721394
TGW_SL21	TA005366.0788	6A	129.7217216	128.2090695	134	AX-95228827	Ra_c14408_576	TA005366.0788	1.03E-06	0.018877157	6.373705373	1.176391327	-4.482752951	NA	0.733296039	-0.778933917	NA	1.890952423	1.461047079
TGW_SL21	wsnp_Ex_rep_c102159_87386822	6B	68.89009042	61.1043789	71.40777617	BobWhite_c16635_331	Tdurum_contig21737_203	wsnp_Ex_rep_c102159_87386822	9.20E-06	0.03236409	2.834388666	-1.308414878	0.412047682	1.525973788	-1.052135	0.591024258	0.80373699	-0.032195439	-0.940037399
GW	AX-95235178	1A	155.8425965	153.3300125	165	wsnp_Ex_rep_c109742_92411838	RAC875_c37545_289	AX-95235178	3.39E-05	0.077687607	0.090096733	-0.028960712	0.039850973	0.003085932	0.039778637	0.030493664	-0.050245759	-0.008664217	-0.025338518
GW	loc136	2A	136	126.3388492	144.6742587	AX-95661975	BS00090569_51	BS00090569_51	6.26E-06	0.076225258	0.142726603	-0.094794165	0.02308251	-0.019839497	0.022238998	0.016401821	0.007050445	-0.00207255	0.047932438
GW	loc23	4D	23	17	34	AX-95148759	TG0011	TG0011	1.77E-13	0.196533057	0.153542127	NA	0.064741189	-0.038154312	NA	0.062214061	NA	NA	-0.088800938
GW	loc156	6A	156	145	164	Tdurum_contig76709_195	IACX170	Tdurum_contig76709_195	1.84E-05	0.043202885	0.091926365	0.005294631	-0.014247223	-0.047111053	0.044815312	-0.013987729	-0.036499798	0.041324453	0.020411409
GW	wsnp_Ex_rep_c66552_64837613	6B	72.91532655	60	80	wsnp_Ex_c25505_34771897	RAC875_c65227_99	wsnp_Ex_rep_c66552_64837613	2.85E-06	0.058969264	0.073447824	-0.030011963	0.019786681	0.007878403	-0.0451571	0.028290724	0.004720495	-0.004525214	0.019017974
GW_FK16	loc134	2A	134	129.36936	139	AX-94436530	AX-95661975	AX-95661975	7.12E-08	0.088090924	0.154803513	-0.074267477	0.048716073	-0.001871565	0.022941591	-0.008609862	-0.027645052	-0.039799743	0.080536036
GW_FK16	loc37	4D	37	21	38	TG0011	AX-94747406	TG0011	9.07E-07	0.003579162	0.084681773	NA	0.035063383	-0.04961839	NA	0.029519415	0.032025244	NA	-0.046989653
GW_FK16	loc54	6B	54	34	55	AX-94779724	Kukri_c8343_228	Kukri_c8343_228	7.95E-06	0.058287198	0.136240748	-0.057786147	-0.026533932	0.078454601	-0.05531924	0.006131535	0.032534521	0.022518662	NA
GW_FK16	Tdurum_contig29240_206	7A	346.2145672	340	353	Excalibur_rep_c102327_102	AX-94464723	Tdurum_contig29240_206	1.42E-05	0.054748169	0.132374473	0.020332723	-0.057785894	0.044613445	0.001751539	-0.002692648	-0.007814748	-0.065389445	0.066985028
GW_FD18	wsnp_Ex_c55735_58127324	2B	196.4879732	188.3594894	207	wsnp_Ex_c17845_26604587	AX-94388449	wsnp_Ex_c55735_58127324	3.31E-08	0.065204681	0.102005198	NA	0.0373285	NA	NA	0.021697726	0.012591404	-0.064676698	-0.006940931
GW_FD18	BS00099053_51	4D	0	0	18	BS00099053_51	Excalibur_c26088_184	BS00099053_51	1.13E-10	0.087313221	0.12478932	NA	0.02983273	-0.077311025	NA	0.047478295	NA	NA	NA
GW_FD18	Excalibur_c8030_2139	5A	216.0228596	211	218	wsnp_Ex_rep_c69647_68598463	RFL_Contig1284_640	Excalibur_c8030_2139	4.87E-07	0.019323608	0.081722096	0.034324903	0.006362339	-0.019999152	0.024886033	-0.038449402	-0.002685707	-0.043080555	0.038641541
GW_FD18	BS00063990_51	6A	68.85222993	66	79	wsnp_BE490604A_Ta_2_1	BS00029282_51	BS00063990_51	2.50E-05	0.048089989	0.10943475	-0.009652683	-0.060788971	-0.053980836	0.04864578	0.03759686	0.03675465	0.012940527	-0.011515327
GW_FD18	Tdurum_contig76709_195	6A	155.3023814	145	166	BS00043716_51	IACX170	Tdurum_contig76709_195	9.58E-07	0.034013891	0.109012854	0.002011765	0.014864999	-0.050044286	0.046268234	-0.018439972	-0.056090055	0.052922798	0.008506517
GW_FD18	wsnp_Ex_c24400_33645206	7A	90.18039847	85	96.8071962	IAAV4945	IAAV1971	wsnp_Ex_c24400_33645206	2.95E-06	0.051137758	0.092247553	0.021386749	0.016178196	0.035969083	0.036323707	-0.055923846	-0.02040824	0.007068625	-0.040594275
GW_GL18	wsnp_Ku_c10202_16937059	7A	199.7895828	189	210	Kukri_rep_c105999_572	BS00092631_51	wsnp_Ku_c10202_16937059	4.89E-05	0.057116339	0.078881673	0.01718328	0.043382092	-0.0171219	-0.024174355	-0.035499581	-0.005031951	0.001163638	0.020098779
GW_SL18	wsnp_Ex_rep_c67543_66165372	2B	193.9702874	184	204	Excalibur_rep_c66577_159	AX-94401657	wsnp_Ex_rep_c67543_66165372	1.95E-05	0.07636489	0.273603766	0.182820175	0.000963435	NA	NA	-0.024359661	-0.035148921	-0.090783591	-0.033491437
GW_SL18	loc30	4D	30	17	37	TG0011	AX-94747406	TG0011	1.21E-14	0.201855777	0.18200315	NA	0.074289731	-0.036748905	NA	0.070172594	NA	NA	-0.107713419
GW_SL18	Tdurum_contig76709_195	6A	155.3023814	145	162.9708834	BS00043716_51	IACX170	Tdurum_contig76709_195	5.12E-07	0.055165967	0.116023671	0.011133009	0.004478012	-0.066425741	0.043459451	-0.023975001	-0.047222686	0.04959793	0.028955026
GW_SL18	AX-94741870	6B	70.90525938	60	81	Kukri_c4892_755	BS00073879_51	AX-94741870	8.63E-06	0.073485145	0.1121457	-0.035506499	0.019235541	0.010687432	-0.055610342	0.025401867	0.011485114	-0.032228472	0.056535359
GW_MR19	loc143	1A	143	128	149	TA002594.0782	IACX5960	TA002594.0782	4.19E-05	0.11990255	0.140431436	-0.039410982	0.061075368	0.001787816	0.016761897	0.058162062	-0.079356068	-0.001957437	-0.017062655
GW_MR19	Jagger_c6853_60	2B	184.8213601	180.2730954	196.4879732	AX-94693685	AX-94393508	Jagger_c6853_60	3.45E-05	0.080130411	0.252154243	0.153186991	-0.013245842	NA	NA	-0.012674181	-0.036689498	-0.098967252	0.008389783
GW_MR19	loc18	4D	18	5	26	AX-95148759	TG0011	AX-95148759	1.65E-22	0.200463393	0.199576243	NA	0.082370519	-0.035029041	NA	0.069864247	NA	NA	-0.117205724
GW_HL20	AX-95235178	1A	155.8425965	153.3300125	161.7200895	wsnp_Ex_rep_c109742_92411838	RAC875_c37545_289	AX-95235178	1.16E-07	0.093278768	0.105248226	-0.026967851	0.04781871	0.015138187	0.03157599	0.043267047	-0.057429516	-0.008153162	-0.045249403
GW_HL20	loc142	2A	142	137	146	BS00022377_51	AX-94860603	AX-94860603	4.51E-08	0.077649954	0.1318913	-0.094563492	0.011372493	-0.033708448	0.035750263	0.03381746	0.019485188	-0.009481272	0.037327808
GW_HL20	JD_c39990_130	2B	134.7620447	133.7570111	144	IAAV539	RFL_Contig1633_304	JD_c39990_130	1.61E-07	0.070413985	0.082188491	0.037717332	0.030491125	NA	NA	0.012947294	-0.043561165	-0.04447116	0.006876574
GW_HL20	loc26	4D	26	17	37	AX-95148759	TG0011	TG0011	1.61E-14	0.17901755	0.163518988	NA	0.070146028	-0.028801512	NA	0.052028445	NA	NA	-0.093372961
GW_HL20	BS00022772_51	6B	74.92539372	66.37240468	80	BS00047179_51	wsnp_Ex_c14586_22625563	BS00022772_51	1.33E-10	0.054056696	0.085677888	-0.02890308	0.009684117	0.00014182	-0.04505747	0.034207346	-0.007577577	-0.003115574	0.040620419
GW_HL20	wsnp_Ex_c35_77935	7A	45.64093637	40	51	BS00110940_51	Ex_c9615_574	wsnp_Ex_c35_77935	9.94E-06	0.049278102	0.114280463	-0.074724564	0.030099174	-0.046339875	0.039555899	-0.009764613	-0.004393163	0.034400906	0.031166235
GW_SL21	AX-95235178	1A	155.8425965	152.3249789	160	wsnp_Ex_rep_c109742_92411838	RAC875_c37545_289	AX-95235178	1.84E-05	0.083204748	0.109544179	-0.035862141	0.052144342	0.003233763	0.030185559	0.028724839	-0.057399837	-0.013476378	-0.007550147
GW_SL21	BS00099053_51	4D	0	0	17	BS00099053_51	Excalibur_c26088_184	BS00099053_51	1.07E-11	0.08738327	0.099681222	NA	0.030686876	-0.065184049	NA	0.034497173	NA	NA	NA
GW_SL21	BS00021939_51	5A	86.05327937	79	92	TA002406.0765	AX-95204677	BS00021939_51	5.18E-05	0.053598271	0.109704223	0.015572701	-0.039535631	0.018291413	-0.027926595	-0.046109173	-0.003510419	0.019622654	0.06359505
GW_SL21	loc67	6B	67	57	71.91029296	AX-94426561	wsnp_Ex_c7907_13427724	wsnp_Ex_c7907_13427724	2.58E-06	0.057236884	0.083726786	-0.037476563	0.03572242	0.020378321	-0.048004366	0.011260355	0.023167522	0.002183834	-0.007231524
GW_SL21	loc181	7A	181	169	182	wsnp_BF474379A_Ta_2_2	BS00099881_51	wsnp_BF474379A_Ta_2_2	5.94E-06	0.033439659	0.087700212	0.052374796	0.014951932	-0.031727459	-0.009135872	-0.035325416	0.032815872	-0.01753988	-0.006413975
GL	AX-94644377	1A	174.9367881	164	181	wsnp_CAP12_c1960_972031	BobWhite_c96_170	AX-94644377	1.25E-05	0.025758947	0.230058071	-0.035609193	0.042042436	-0.014863096	0.144006602	-0.021066925	-0.012664415	-0.086051469	-0.01579394
GL	loc23	1B	23	20	33.56375497	RFL_Contig4140_1135	AX-94569385	RFL_Contig4140_1135	1.14E-07	0.114706529	0.314188296	0.20473175	-0.021663053	-0.044697853	0.021854403	-0.006516712	-0.066841802	0.022589814	-0.109456546
GL	RAC875_c15593_1421	1B	238.9485782	235	242	Excalibur_c34765_1023	BobWhite_c13124_430	RAC875_c15593_1421	1.03E-08	0.055302384	0.181646841	0.080622806	-0.101024035	0.037551289	0.044004187	0.002225565	0.005657659	-0.01724255	-0.05179492
GL	BobWhite_c16735_131	2B	182.2882643	178.765545	183.8112247	Tdurum_contig91519_224	AX-94693685	BobWhite_c16735_131	5.58E-11	0.03802112	0.154647035	-0.027750506	0.095968609	NA	NA	-0.010583605	0.005694621	-0.058678426	-0.004650694
GL	loc239	3A	239	230.1561758	241	AX-94666858	RAC875_c10194_673	RAC875_c10194_673	4.81E-07	0.058561916	0.266260477	-0.127896449	-0.00445504	-0.025601221	0.049626034	-0.023197144	0.138364028	-0.009758468	0.00291826
GL	Kukri_c13537_2069	3B	142.9090913	139	150	BS00045195_51	CAP8_rep_c4453_136	Kukri_c13537_2069	1.94E-05	0.044249731	0.186888209	0.041453987	-0.076557138	0.100573873	-0.025816899	-0.086314336	0.000855472	0.069821582	-0.024016542
GL	loc153	6D	153	140	157	AX-94567100	RFL_Contig2615_982	AX-94567100	1.76E-11	0.059125282	0.264902662	-0.023749023	-0.039537086	-0.034748563	0.173857732	0.028284888	-0.060658133	0.047595114	-0.091044929
GL	loc60	7A	60	52.47776255	70	BobWhite_rep_c58252_112	Tdurum_contig82510_574	Tdurum_contig82510_574	3.33E-08	0.095856439	0.26443802	-0.143582943	-0.044379805	0.055662068	0.120855076	0.029717968	-0.024329867	0.09721231	-0.091154808
GL	wsnp_Ku_c19251_28705893	7A	324.0452646	310	327	BS00066468_51	TA002938.0337	wsnp_Ku_c19251_28705893	8.00E-06	0.002221672	0.137389289	0.060619607	0.009590678	0.007599463	NA	0.019589397	-0.076769682	-0.051747459	0.031117996
GL_FK16	RFL_Contig4140_1135	1B	21.11854445	16	31	Tdurum_contig78972_316	AX-94569385	RFL_Contig4140_1135	3.01E-06	0.101350422	0.37615007	0.220946388	-0.004612724	-0.040852653	0.018754331	-0.013525578	-0.066619087	0.041113005	-0.155203682
GL_FK16	Kukri_c4453_1248	1B	237.9435446	233.4003817	243	AX-94948241	Excalibur_c34765_1023	Kukri_c4453_1248	1.58E-05	0.061300695	0.22280422	0.098253514	-0.124550706	0.046017251	0.037264208	-0.044507529	0.049656711	0.011361732	-0.073495181
GL_FK16	Excalibur_c46000_203	5B	275.3781133	273	279.413553	D_GDEEGVY01AU4CW_149	AX-94820753	Excalibur_c46000_203	2.59E-05	0.069586922	0.249098471	0.044559488	-0.091383207	0.004268061	0.048319829	0.157715264	-0.075139231	-0.085692802	-0.002647402
GL_FK16	loc56	7A	56	52.47776255	68	BobWhite_rep_c58252_112	Tdurum_contig82510_574	BobWhite_rep_c58252_112	2.00E-07	0.060273875	0.269554929	-0.155129916	0.013356746	0.052063412	0.075068915	0.069233238	-0.036635535	0.114425014	-0.132381873
GL_FK16	loc320	7A	320	313	323	Excalibur_c95707_285	wsnp_JD_c20555_18262317	Excalibur_c95707_285	9.28E-10	0.033744141	0.175312574	0.061590143	0.016344259	0.036079431	NA	0.043460424	-0.113722432	-0.089156208	0.045404382
GL_FD18	wsnp_CAP12_c1960_972031	1A	174.4342713	164	175.9469234	RFL_Contig22_617	AX-94644377	wsnp_CAP12_c1960_972031	1.13E-05	0.067503372	0.333689814	-0.062294696	0.079417781	-0.040621648	0.236363064	-0.059158062	-0.042381914	-0.09732675	-0.013997774
GL_FD18	AX-94569385	1B	26.38657023	16	33	RFL_Contig4140_1135	BS00105833_51	AX-94569385	5.52E-07	0.095711578	0.345279874	0.225129159	-0.03162946	-0.019390375	0.002871806	-0.022642972	-0.068609721	0.034422278	-0.120150716
GL_FD18	Tdurum_contig91519_224	2B	181.7857475	171	184.8213601	BobWhite_c10215_242	BobWhite_c16735_131	Tdurum_contig91519_224	2.69E-05	0.03165549	0.156669756	-0.00146536	0.100187375	NA	NA	-0.019184987	0.003555018	-0.056482381	-0.026609665
GL_FD18	wsnp_Ex_c1894_3575749	3A	244.3805349	234	252	RAC875_c10194_673	Excalibur_c49743_97	wsnp_Ex_c1894_3575749	9.79E-06	0.083292184	0.233128582	0.004924695	-0.014168547	-0.091094245	0.052258641	-0.041499111	0.142034336	-0.076961483	0.024505715
GL_FD18	RAC875_c32611_347	5B	91.14399911	83	100.2730726	TA002629.0128	AX-94521932	RAC875_c32611_347	6.16E-07	0.091048594	0.499425278	-0.288266212	-0.06489865	-0.031392154	0.135351755	0.023049101	0.012976628	0.002020466	0.211159066
GL_FD18	loc133	6D	133	127.2523385	147.6467751	RAC875_c24285_1049	Ex_c7086_187	Ex_c7086_187	2.94E-08	0.029327749	0.256909825	-0.009192454	-0.083331547	0.006280568	0.173578277	0.030710869	-0.061118972	-0.004671957	-0.052254784
GL_GL18	AX-94692514	1B	30.51762166	16	37	BS00105833_51	Kukri_c92979_195	AX-94692514	9.08E-07	0.095185762	0.27900771	0.170811891	-0.010220521	-0.073166445	0.022544699	0.009131432	-0.036488896	0.025583659	-0.108195819
GL_GL18	loc239	1B	239	235	243	RAC875_c15593_1421	BobWhite_c13124_430	RAC875_c15593_1421	3.49E-10	0.07623137	0.229663683	0.129881614	-0.099782069	0.02113875	0.003286397	0.028859194	-0.054371368	0.010092364	-0.039104882
GL_GL18	loc251	2A	251	243.4337992	261	AX-94611746	Tdurum_contig86243_288	Tdurum_contig86243_288	2.12E-06	0.094770545	0.24156995	-0.013518495	0.001173149	-0.115306963	0.094435014	-0.03531667	0.013211459	-0.070940481	0.126262987
GL_GL18	BobWhite_c10215_242	2B	181.2832307	171	183.8112247	wsnp_Ex_c51352_55323092	Tdurum_contig91519_224	BobWhite_c10215_242	4.44E-05	0.031405609	0.128229323	0.017986393	0.07903741	NA	NA	-0.0147498	-0.049191913	-0.041818252	0.008736163
GL_GL18	wsnp_Ex_c3907_7088011	3B	257.3675333	249	265	BS00060666_51	BS00072993_51	wsnp_Ex_c3907_7088011	7.60E-06	0.013204787	0.144278678	0.009400556	0.065658323	0.022074855	-0.017803113	-0.078620355	-0.047678633	0.023462904	0.023505463
GL_GL18	loc137	6D	137	131	147.6467751	RAC875_c12542_1857	IAAV64	IAAV64	4.29E-09	0.072044848	0.275016636	0.002292165	-0.06977993	-0.031848953	0.179664241	-0.009167976	-0.035038187	0.059231035	-0.095352395
GL_SL18	loc6	1A	6	0	11	PM3a	AX-95080900	PM3a	1.65E-05	0.010862634	0.143007121	NA	0.066981311	0.014025015	NA	-0.076025809	0.000502951	-0.005483469	NA
GL_SL18	AX-94692514	1B	30.51762166	20	34	BS00105833_51	Kukri_c92979_195	AX-94692514	1.57E-06	0.089023344	0.271079958	0.201976291	-0.039388383	-0.042447183	0.02578931	-0.036074239	-0.061161749	0.02040962	-0.069103667
GL_SL18	IAAV1683	1B	236.938511	231	243	Tdurum_contig32775_78	AX-94948241	IAAV1683	7.26E-07	0.048018431	0.173372198	0.09204075	-0.081331448	0.047199844	0.05904812	-0.05563367	0.027549595	-0.022932398	-0.065940794
GL_SL18	BobWhite_c10215_242	2B	181.2832307	176.2324493	186.8468372	wsnp_Ex_c51352_55323092	Tdurum_contig91519_224	BobWhite_c10215_242	7.08E-08	0.033675806	0.188159906	-0.006274599	0.102289537	NA	NA	-0.012086338	0.043842235	-0.041900465	-0.085870369
GL_SL18	wsnp_Ex_c1894_3575749	3A	244.3805349	234	246.406012	RAC875_c10194_673	Excalibur_c49743_97	wsnp_Ex_c1894_3575749	1.34E-05	0.073615482	0.21395199	-0.031205362	-0.006825293	-0.074433973	0.042897111	-0.009586026	0.139518017	-0.050081937	-0.010282538
GL_SL18	Kukri_c13537_2069	3B	142.9090913	133	151	BS00045195_51	CAP8_rep_c4453_136	Kukri_c13537_2069	2.13E-05	0.045282135	0.202847468	0.028999773	-0.088147445	0.114700023	-0.039576561	-0.070591159	0.004741994	0.075461768	-0.025588394
GL_SL18	loc150	6D	150	136	157	BS00070856_51	AX-94567100	AX-94567100	9.18E-07	0.068154423	0.329916814	-0.016169331	-0.027270324	-0.026290469	0.201499448	0.004396454	-0.053533418	0.045785006	-0.128417366
GL_SL18	Kukri_c42807_473	7A	214.3407299	211	217	wsnp_Ex_c40011_47158369	AX-95195962	Kukri_c42807_473	2.45E-07	0.055402374	0.183444808	-0.040254583	0.10903339	-0.03122874	0.050167495	-0.047304789	0.008311576	0.025687068	-0.074411418
GL_MR19	Excalibur_c1066_303	1A	178.9981585	174.4342713	183	TA002402.1350	AX-94440483	Excalibur_c1066_303	2.76E-06	0.007256207	0.135513455	-0.036561305	0.036879093	0.000973558	0.040863478	0.015692475	0.042468851	-0.093044604	-0.007271546
GL_MR19	AX-94692514	1B	30.51762166	20	33	BS00105833_51	Kukri_c92979_195	AX-94692514	4.94E-10	0.11660397	0.320375742	0.223365974	-0.046760926	-0.045537	0.027038738	-0.011352599	-0.097009769	0.036082541	-0.085826959
GL_MR19	loc143	3B	143	141	153	Kukri_c13537_2069	CAP8_rep_c4453_136	Kukri_c13537_2069	4.15E-06	0.040022017	0.190926633	0.055151078	-0.078805079	0.104555971	-0.03847183	-0.086370663	0.006866373	0.062144999	-0.025070849
GL_MR19	loc149	6D	149	136	157	BS00070856_51	AX-94567100	BS00070856_51	1.23E-08	0.063631213	0.2919712	-0.015558875	-0.040058177	-0.052978886	0.20402247	0.011479424	-0.078684438	0.059727211	-0.08794873
GL_MR19	loc60	7A	60	52.47776255	72	BobWhite_rep_c58252_112	Tdurum_contig82510_574	Tdurum_contig82510_574	2.44E-05	0.090646711	0.294715042	-0.157058765	-0.061725499	0.069648225	0.137656277	0.019875078	-0.008913069	0.096063277	-0.095545525
GL_MR19	wsnp_Ku_c19251_28705893	7A	324.0452646	314	327.6415516	BS00066468_51	TA002938.0337	wsnp_Ku_c19251_28705893	7.73E-06	0.007076153	0.134694067	0.047756676	0.002494875	0.023045247	NA	0.022933341	-0.086440392	-0.058043424	0.048253676
GL_HL20	wsnp_CAP12_c1960_972031	1A	174.4342713	164	175.9469234	RFL_Contig22_617	AX-94644377	wsnp_CAP12_c1960_972031	1.45E-06	0.023030795	0.21591603	-0.038052959	0.055907713	-0.016999487	0.137785155	-0.005462112	-0.013326091	-0.078130875	-0.041721344
GL_HL20	AX-94692514	1B	30.51762166	20	41	BS00105833_51	Kukri_c92979_195	AX-94692514	8.74E-08	0.119586842	0.312599454	0.22210012	-0.04448138	-0.056537563	0.047241522	-0.030178654	-0.071216907	0.023572196	-0.090499334
GL_HL20	RAC875_c15593_1421	1B	238.9485782	234.9130338	243.6641121	Excalibur_c34765_1023	BobWhite_c13124_430	RAC875_c15593_1421	2.90E-05	0.043154051	0.169903881	0.073955793	-0.095948088	0.021273034	0.060158592	0.000688592	-0.009992925	-0.014911147	-0.035223853
GL_HL20	wsnp_Ex_c7003_12065567	2B	179.7705786	171.6943881	183.8112247	Ku_c6546_718	wsnp_Ex_c51352_55323092	wsnp_Ex_c7003_12065567	3.22E-08	0.021884141	0.224017538	-0.035888211	0.109312315	NA	NA	0.026921159	0.027246237	-0.012886279	-0.114705223
GL_HL20	Kukri_c13537_2069	3B	142.9090913	137.3242241	153	BS00045195_51	CAP8_rep_c4453_136	Kukri_c13537_2069	1.47E-06	0.04788387	0.214758229	0.052252535	-0.076554744	0.10989845	-0.012707903	-0.104859779	-0.013015744	0.070393943	-0.025406759
GL_HL20	loc152	6D	152	141	162	AX-94567100	RFL_Contig2615_982	AX-94567100	1.50E-11	0.071502937	0.262123806	-0.046085827	-0.038854215	-0.064521705	0.185644578	0.049353923	-0.071122818	0.062065293	-0.076479228
GL_HL20	loc60	7A	60	52.47776255	73	BobWhite_rep_c58252_112	Tdurum_contig82510_574	Tdurum_contig82510_574	2.05E-05	0.090812899	0.278556242	-0.157706214	-0.031787883	0.065215598	0.120850028	0.04534244	-0.023099593	0.090391703	-0.109206078
GL_HL20	wsnp_Ku_c19251_28705893	7A	324.0452646	323.5427478	327	BS00066468_51	TA002938.0337	wsnp_Ku_c19251_28705893	4.99E-06	0.002320278	0.137601619	0.042582981	0.018224462	0.005372931	NA	0.023250189	-0.095018638	-0.031045711	0.036633785
GL_SL21	loc236	1B	236	234	242	wsnp_Ex_rep_c67098_65573819	Tdurum_contig32775_78	Tdurum_contig32775_78	2.23E-09	0.061206244	0.198383791	0.086460973	-0.111922818	0.054616163	0.056977375	-0.035758344	0.006487501	-0.027806055	-0.029054795
GL_SL21	loc208	2B	208	200.0627733	221	AX-94522698	IAAV5350	AX-94522698	1.41E-05	0.042044392	0.142174859	NA	0.105444012	NA	NA	-0.000759393	-0.036730847	-0.036373515	-0.031580257
GL_SL21	loc221	3A	221	220	241	IACX5899	RAC875_c79551_167	RAC875_c79551_167	2.25E-06	0.077544879	0.254701688	-0.103278649	-0.010470467	-0.016269264	0.048404562	-0.039709498	0.151423039	0.009489722	-0.039589445
GL_SL21	BS00045195_51	3B	142.4065745	139	148.5198894	wsnp_Ex_c54357_57265797	Kukri_c13537_2069	BS00045195_51	4.61E-06	0.060270527	0.23204692	0.032112497	-0.100579845	0.127776928	-0.018587957	-0.104269992	-0.013294728	0.069144393	0.007698702
GL_SL21	Excalibur_c46000_203	5B	275.3781133	271	276.8907655	D_GDEEGVY01AU4CW_149	AX-94820753	Excalibur_c46000_203	1.51E-06	0.065479667	0.220092441	0.067361606	-0.068315895	-0.009072944	0.024919741	0.138973386	-0.081119055	-0.056407274	-0.016339566
GL_SL21	AX-94649056	7A	52.98027934	44	62.61887798	AX-95249973	AX-95133112	AX-94649056	1.75E-06	0.044895705	0.191946484	-0.082812145	-0.02244145	0.05651135	0.057978907	0.06940726	-0.037400528	0.075351545	-0.116594939
GPC	loc218	1A	218	212.2627375	220.1920702	wsnp_Ex_rep_c72011_70562321	AX-95151237	wsnp_Ex_rep_c72011_70562321	2.50E-05	-0.010232647	0.254099582	-0.006844392	0.062234848	0.126210365	0.090900298	-0.015494	-0.083331663	-0.127889217	-0.045786239
GPC	RAC875_c39665_175	2A	127.3438828	119	131	wsnp_BE406351A_Ta_2_2	wsnp_BE406351A_Ta_2_3	RAC875_c39665_175	7.24E-14	0.088203297	0.727155444	0.363058489	0.049739267	-0.0914101	-0.062932354	-0.027807769	-0.364096955	-0.098527557	0.23197698
GPC	loc271	2B	271	265.7098434	277.4939867	IAAV283	RAC875_c65882_668	RAC875_c65882_668	6.89E-06	0.037815726	1.205702734	-0.466626482	0.000752755	-0.155191777	NA	NA	-0.110617514	0.739076252	-0.007393233
GPC	AX-94860457	2D	108.5748002	100	113	D_GA8KES401AVZF3_380	AX-94448732	AX-94860457	8.04E-08	0.068956555	0.630944592	-0.042672088	-0.035688374	-0.102859853	0.144193402	-0.200821665	-0.164305418	0.430122926	-0.02796893
GPC	loc111	3A	111	98	116.0846349	wsnp_Ku_c44089_51445136	Ku_c17569_905	wsnp_Ku_c44089_51445136	9.27E-08	0.078753011	1.299740054	0.134321284	-0.95402449	-0.011208753	-0.011476166	0.345715564	0.20175713	0.057485349	0.237430083
GPC	loc139	4A	139	137.552357	144	BobWhite_c10610_1096	Excalibur_c4325_1440	BobWhite_c10610_1096	3.22E-10	0.062408459	0.714050132	-0.011655757	0.465482926	0.010374803	0.119761702	-0.153003071	-0.136710199	-0.248567206	-0.045683198
GPC	loc75	4B	75	71	80.53899178	TG0010	BS00022258_51	TG0010	6.22E-14	0.095613252	0.718955134	NA	-0.474885401	NA	0.198183002	-0.173730134	0.244069733	0.198659917	0.007702882
GPC	loc29	4D	29	17	38	TG0011	AX-94747406	TG0011	4.26E-09	0.070499847	0.619505364	NA	0.236397351	-0.215022671	NA	0.299065342	NA	NA	-0.320440022
GPC	loc29	5A	29	24	38	Ra_c69221_1167	wsnp_RFL_Contig4307_5006558	Ra_c69221_1167	4.06E-09	0.070499847	0.619505364	NA	0.236397351	-0.215022671	NA	0.299065342	NA	NA	-0.320440022
GPC	Ku_c7546_861	5B	302.5393487	291.5148749	302.5393487	RAC875_c18094_69	NA	Ku_c7546_861	1.31E-06	0.042489563	0.511445355	0.251234378	0.028689347	0.042129428	-0.203982126	-0.260210977	0.047041616	-0.082963438	0.178061773
GPC	BobWhite_c47143_592	6A	179.2485889	170	186	CAP12_c2701_221	Excalibur_c32711_504	BobWhite_c47143_592	2.34E-09	0.073470169	0.692078909	0.151352404	-0.414895496	-0.126051682	0.072598384	-0.005939268	-0.16112922	0.277183413	0.206881466
GPC	tplb0021a17_853	6B	156.0908128	154.049713	161	Tdurum_contig51640_847	BS00022832_51	tplb0021a17_853	3.83E-09	0.05095229	0.503212162	0.206166426	-0.111021803	0.116400825	-0.146872003	-0.173009032	0.07018776	0.270679995	-0.232532167
GPC_FK16	Kukri_c11327_977	2A	130.8820121	130	143	AX-95095516	AX-95256011	Kukri_c11327_977	3.86E-07	0.059603189	0.894770247	0.635901268	-0.101514312	-0.134359131	-0.19344513	0.001699323	-0.258868979	-0.123675486	0.174262447
GPC_FK16	Tdurum_contig60165_722	5B	290.5098413	281.4390302	301.5292134	Excalibur_c2618_1723	CAP8_c2277_179	Tdurum_contig60165_722	3.82E-05	0.058954991	0.606284964	0.220023473	-0.06756685	0.251115165	-0.170675066	-0.355169799	0.071589398	-0.186149507	0.236833186
GPC_FK16	loc48	7A	48	39	56	wsnp_Ex_c35_77935	Ex_c9615_574	wsnp_Ex_c35_77935	2.89E-06	0.10306238	0.995044566	0.314716759	-0.532211597	-0.11718116	0.060158348	-0.315830259	0.151745695	-0.024230756	0.462832969
GPC_GL17	loc139	2A	139	131.8870457	144	BS00090569_51	GENE.1792_560	GENE.1792_560	6.38E-10	0.096466999	1.118633657	0.759045373	-0.035989756	0.029072521	-0.193397849	-0.166695241	-0.359588284	0.02409806	-0.056544823
GPC_GL17	Kukri_c14902_1112	2D	100.9174768	97	111	AX-95228764	AX-94989875	Kukri_c14902_1112	1.06E-08	0.074976821	0.698903484	-0.005667659	-0.084221888	-0.077594859	0.06836817	-0.114840744	-0.057510186	0.485185325	-0.213718159
GPC_GL17	BS00023080_51	6B	161.2319996	155	168	wsnp_Ex_c34123_42489621	wsnp_Ex_rep_c70036_68988728	BS00023080_51	2.25E-05	0.057522107	0.594001868	0.063970584	-0.068194774	0.027863811	-0.03959177	-0.238839266	0.066730472	0.355162602	-0.167101658
GPC_GL17	loc114	7B	114	108	115.6788162	Kukri_c39759_102	BobWhite_rep_c63166_725	BobWhite_rep_c63166_725	6.44E-06	0.04667126	0.5215273	0.261780133	0.193808413	0.068501173	-0.162397445	-0.042043202	0.001312385	-0.259747167	-0.061214289
GPC_MR17	loc130	2A	130	122	136	AX-95196147	AX-95095516	AX-95095516	1.39E-08	0.058220401	0.672223061	0.332766649	-0.066260403	-0.235741027	-0.057977973	0.243048121	-0.339456412	0.051406902	0.072214142
GPC_MR17	loc112	2D	112	99	120	AX-94448732	wsnp_Ex_rep_c66522_64795143	AX-94448732	1.84E-08	0.092695492	0.646132834	-0.200281789	0.225781964	-0.09865398	0.095709345	-0.221467337	-0.166254887	0.424665497	-0.059498812
GPC_MR17	wsnp_Ku_c44089_51445136	3A	110.4358295	100	114	wsnp_JG_c2509_1153697	Ku_c17569_905	wsnp_Ku_c44089_51445136	6.32E-06	0.062811235	1.323156957	0.050393528	-0.960878847	0.099349208	0.102208398	0.206417525	0.133239919	0.006992161	0.362278109
GPC_MR17	BS00011330_51	7A	64.6599777	54.4929315	73	Tdurum_contig82510_574	AX-94388916	BS00011330_51	6.82E-06	0.100010351	1.044446056	-0.014842341	-0.653214393	-0.06309258	0.126426687	-0.117718913	0.103711396	0.391231663	0.227498481
GPC_FD18	AX-94503133	2A	121.7851655	119	134	AX-94459200	AX-94388414	AX-94503133	4.17E-06	0.056511252	0.604248214	0.163880113	0.129891848	0.062212587	-0.046194188	-0.020683516	-0.370699009	-0.151957038	0.233549204
GPC_FD18	AX-94860457	2D	108.5748002	98	119	D_GA8KES401AVZF3_380	AX-94448732	AX-94860457	1.81E-05	0.048593356	0.642370295	-0.04975203	0.025624589	-0.051417795	0.222151673	-0.288153592	-0.128481844	0.354216703	-0.084187703
GPC_FD18	loc178	3B	178	164	179	BobWhite_rep_c50457_813	BobWhite_c19725_1329	BobWhite_c19725_1329	5.98E-08	0.02931987	0.565330405	0.173570237	0.180445768	0.053577649	0.015882144	0.169347284	0.080195102	-0.384884637	-0.288133547
GPC_FD18	loc178	5B	178	167	187	AX-94724456	RFL_Contig1265_515	RFL_Contig1265_515	1.67E-07	0.02931987	0.565330405	0.173570237	0.180445768	0.053577649	0.015882144	0.169347284	0.080195102	-0.384884637	-0.288133547
GPC_FD18	loc181	6A	181	170	190	Excalibur_c32711_504	Excalibur_c2834_397	Excalibur_c32711_504	9.54E-08	0.070895302	0.778465134	0.079112082	-0.485147141	0.077769765	0.03428868	-0.066265666	-0.17380328	0.293317993	0.240727567
GPC_FD18	wsnp_Ex_c34123_42489621	6B	157.6034649	156.0908128	162	BS00022832_51	BS00023080_51	wsnp_Ex_c34123_42489621	1.38E-08	0.056111746	0.544664553	0.297197798	-0.152678215	0.065901118	-0.210774838	-0.247466755	0.118643212	0.29108654	-0.16190886
GPC_FD18	loc93	7A	93	91.18543206	95	BobWhite_c34551_714	BS00063555_51	BS00063555_51	3.54E-05	0.092822442	1.154623994	0.13482755	-0.708442471	-0.099929686	0.142681653	-0.010203258	0.021611904	0.446181523	0.073272786
GPC_FD18	BS00066468_51	7A	323.5427478	316.4192976	330.7087331	tplb0045p11_893	wsnp_Ku_c19251_28705893	BS00066468_51	1.81E-05	0.069674805	0.714364306	-0.212710131	0.035927969	0.17147691	NA	-0.360231393	0.354132913	0.11892471	-0.107520977
GPC_FD18	wsnp_Ku_rep_c68953_68153061	7B	118.6939169	111	123	BS00092630_51	BobWhite_c3564_81	wsnp_Ku_rep_c68953_68153061	7.31E-06	0.080908974	0.627998062	0.33585918	0.116560035	0.270871432	-0.245511486	0.021598809	-0.034158996	-0.292138882	-0.173080092
GPC_GL18	loc76	4B	76	71	83	TG0010	BS00022258_51	TG0010	6.39E-09	0.073920905	0.99527775	NA	-0.636032295	NA	0.359245455	-0.155399282	0.013381834	0.325561563	0.093242725
GPC_GL18	loc26	4D	26	17	35	AX-95148759	TG0011	TG0011	4.08E-11	0.107735473	0.962374449	NA	0.388791223	-0.416672009	NA	0.495127617	NA	NA	-0.467246832
GPC_GL18	wsnp_Ex_c1630_3105100	5B	49.53901213	40	59	BS00108062_51	BS00056147_51	wsnp_Ex_c1630_3105100	1.24E-05	0.042549792	0.944252882	-0.147296209	0.129051816	0.4722736	-0.471979282	0.154692325	-0.251962094	0.218732739	-0.103512894
GPC_GL18	AX-95076677	6A	165.0119832	155	168	wsnp_JD_c19278_17450210	Kukri_c14877_303	AX-95076677	9.55E-10	0.1004865	1.183073611	0.299648717	-0.607466246	-0.591700008	0.128405778	-0.127047367	0.045486959	0.575607365	0.277064802
GPC_GL18	Excalibur_c27139_516	6B	231.4983488	204	245.8204706	BS00085688_51	wsnp_Ku_c46363_53116979	Excalibur_c27139_516	3.06E-05	0.044845301	0.881151444	0.128413924	-0.224231984	0.525307834	-0.08910217	-0.126681926	0.407590114	-0.265452181	-0.35584361
GPC_SL18	TG0010	4B	74.90038996	64	83	Tdurum_contig81797_369	BS00022258_51	TG0010	5.23E-08	0.080909157	0.956473814	NA	-0.589157945	NA	0.367315869	-0.091055752	0.140666383	0.146516633	0.025714813
GPC_SL18	wsnp_Ku_c38451_47086066	6A	143.7561944	139.197409	153	BobWhite_rep_c48956_706	BS00043716_51	wsnp_Ku_c38451_47086066	5.15E-11	0.058236457	0.916971354	0.106269566	-0.103282529	NA	-0.089299198	-0.444455779	NA	0.472515576	0.058252364
GPC_MR19	loc123	2A	123	119	131.8870457	AX-94503133	AX-94388414	AX-94388414	1.92E-07	0.050250125	0.665937363	0.332631706	-0.057965679	-0.088255077	0.059839584	-0.259986797	-0.333305657	0.100370618	0.246671303
GPC_MR19	loc136	2B	136	128	144.7712814	JD_c39990_130	RFL_Contig1633_304	RFL_Contig1633_304	1.80E-08	0.086378423	0.773454914	-0.08794887	0.087616589	NA	NA	-0.316278292	0.268107637	-0.362475989	0.410978924
GPC_MR19	BobWhite_c10610_1096	4A	138.5573906	136	143	BS00090866_51	Excalibur_c4325_1440	BobWhite_c10610_1096	8.85E-11	0.07463474	0.893588677	-0.024175461	0.555613105	-0.1050108	0.247405892	-0.25263395	-0.072579292	-0.337975572	-0.010643923
GPC_MR19	loc28	4D	28	17	35	TG0011	AX-94747406	TG0011	1.71E-13	0.080498225	0.874625991	NA	0.315636731	-0.182368334	NA	0.370678797	NA	NA	-0.503947194
GPC_MR19	loc4	5A	4	0	12	wsnp_JD_c2128_2930150	AX-94410603	wsnp_JD_c2128_2930150	7.62E-06	0.073354122	1.188235219	0.789582122	-0.360085465	-0.398653097	-0.12690812	-0.09931796	-0.049781786	0.11340429	0.131760016
GPC_MR19	TA002629.0128	5B	90.13386374	80	100.2730726	AX-95106649	RAC875_c32611_347	TA002629.0128	2.67E-06	0.062771941	0.845249198	0.028285574	0.499370929	-0.119034724	-0.174368545	-0.15532136	-0.038467379	0.305413773	-0.345878269
GPC_HL20	TG0010	4B	74.90038996	72.33572525	79.53395819	Tdurum_contig81797_369	BS00022258_51	TG0010	2.54E-09	0.097500593	1.019890939	NA	-0.650471759	NA	0.302941418	-0.233462541	0.369419179	0.260753732	-0.049180028
GPC_HL20	loc19	4D	19	5	26	AX-95148759	TG0011	AX-95148759	3.76E-09	0.05467261	0.827130075	NA	0.367497274	-0.170512691	NA	0.262648217	NA	NA	-0.459632801
GPC_HL20	RAC875_c5129_280	6B	151.0035797	141	154	BS00109036_51	wsnp_Ex_c12433_19827016	RAC875_c5129_280	3.38E-05	0.055939609	0.82661559	0.260714385	-0.246735209	0.52956026	-0.198681713	-0.135822294	-0.29705533	0.304015716	-0.215995816
GPC_HL20	loc81	7A	81	79	86	RAC875_c17861_199	Tdurum_contig82438_73	RAC875_c17861_199	1.80E-07	0.055035502	0.957855226	0.147047901	-0.625002829	-0.005603004	0.145395134	-0.32416576	0.090626505	0.238849656	0.332852397
GPC_HL20	AX-95097572	7A	132.5414439	125	142.9109897	AX-95090243	BS00033442_51	AX-95097572	2.32E-06	0.082028771	0.900749829	-0.027656551	-0.221500208	-0.058327732	-0.121365011	-0.167236257	-0.173950703	0.090786842	0.679249621
GPC_SL21	BS00035273_51	1A	216.0881647	213	220	AX-94788925	wsnp_Ex_rep_c72011_70562321	BS00035273_51	1.01E-06	-0.002343546	0.472614715	-0.234569939	0.087165631	0.165632464	0.074212481	-0.0940187	-0.112632857	0.238044776	-0.123833855
GPC_SL21	wsnp_BE406351A_Ta_2_3	2A	127.8463996	122	134.9808159	RAC875_c39665_175	AX-95196147	wsnp_BE406351A_Ta_2_3	5.54E-10	0.103701521	0.897268503	0.382898887	0.091582375	-0.044085962	-0.205430248	-0.034494189	-0.514369616	-0.043778199	0.367676952
GPC_SL21	loc233	2A	233	227.4813242	241	AX-94516815	IAAV2861	IAAV2861	4.00E-05	0.057332434	1.319669252	0.220069499	0.519482707	0.398753375	-0.800186545	-0.53256887	0.047215903	0.211770392	-0.064536461
GPC_SL21	Kukri_c84629_315	2B	222.46919	219	239.286633	AX-95148316	CAP12_c2472_60	Kukri_c84629_315	1.46E-05	0.0672775	0.72500932	NA	0.247523227	NA	NA	-0.477486093	0.025285796	0.059377244	0.145299826
GPC_SL21	loc140	4A	140	137.552357	146	BobWhite_c10610_1096	Excalibur_c4325_1440	Excalibur_c4325_1440	1.54E-06	0.062039522	0.917435498	0.038420025	0.628269739	-0.053567528	0.152385182	-0.209529572	-0.264476534	-0.289165758	-0.002335554
GPC_SL21	loc13	4D	13	0	18	Excalibur_c26088_184	AX-95148759	AX-95148759	1.32E-05	0.033373357	0.57271106	NA	0.110825854	-0.341768457	NA	0.230942603	NA	NA	NA
GPC_SL21	loc74	7A	74	69	84	Excalibur_rep_c109881_701	Tdurum_contig20214_279	Excalibur_rep_c109881_701	1.63E-06	0.061338407	0.947231459	-0.051371073	-0.469802936	-0.113183278	0.128216104	-0.302551491	0.144140862	0.477428522	0.18712329
GPY	wsnp_Ex_c28287_37424983	1B	67.18186202	57	75	RFL_Contig529_963	AX-95152103	wsnp_Ex_c28287_37424983	1.13E-05	0.083238505	0.043785904	0.003660411	0.007690697	-0.030325507	0.009280131	0.013460396	-0.001836974	-0.008404039	0.006474884
GPY_MR17	BS00011205_51	1B	66.17682844	59.4358173	70	TA004123.0331	RFL_Contig529_963	BS00011205_51	1.70E-08	0.081092073	0.064601445	0.010435991	0.022989994	-0.041611451	0.007161264	0.007411142	0.006708996	-0.009950497	-0.00314544
GPY_MR17	loc108	7A	108	97.309713	117	AX-95172628	BS00024786_51	AX-95172628	4.24E-06	0.07390869	0.052839991	0.018889147	0.033134862	-0.003994077	-0.008529847	-0.016208987	-0.019705129	-0.008910944	0.005324975
GPY_MR17	loc159	7B	159	150	164	Ku_c25310_843	tplb0021f14_1700	Ku_c25310_843	1.36E-05	0.037903078	0.053912034	-0.002830413	-0.013082055	0.015991793	0.004629073	0.004867186	0.028451914	-0.012567381	-0.025460119
GPY_SL18	loc247	6A	247	238	248.8234433	AX-94871483	Tdurum_contig9503_575	AX-94871483	3.42E-05	0.074994057	0.132742444	-0.005819382	0.038629458	0.021820505	0.026896497	-0.006346221	-0.094112986	0.010448165	0.008483963
GPY_MR19	wsnp_Ex_c19525_28494827	6B	247.328021	237.1369506	249.8457067	Tdurum_contig12648_389	wsnp_Ex_c54772_57528275	wsnp_Ex_c19525_28494827	5.13E-08	0.03137114	0.023496482	-0.005825963	0.003274125	NA	NA	NA	NA	0.01302416	-0.010472322
GPY_HL20	loc69	1B	69	60	75	AX-95152103	AX-94509078	AX-95152103	1.68E-05	0.078239861	0.061675361	0.009222149	-0.003634591	-0.037349436	0.016634069	0.021863375	-0.015037819	-0.016023672	0.024325925
GPY_SL21	RAC875_c14885_1184	2B	243.3067673	233	251	BobWhite_rep_c64679_73	BS00111236_51	RAC875_c14885_1184	1.93E-05	0.007110603	0.06195508	NA	0.010981246	NA	NA	-0.036623181	-0.006294003	0.00660404	0.025331899
EWPY	AX-95162604	1B	59.4358173	52.77234881	67.68437882	RFL_Contig2160_617	BS00087784_51	AX-95162604	4.31E-06	0.056542924	0.407317472	0.002488905	0.04457377	-0.282753079	0.124564393	0.065955379	0.07364844	-0.137759553	0.109281745
EWPY	Tdurum_contig26542_457	2B	186.8468372	182.2882643	199	AX-94393508	Tdurum_contig92604_368	Tdurum_contig26542_457	5.05E-07	0.072288962	0.354813276	0.110238692	0.105105751	NA	NA	-0.18712527	0.006749728	-0.194891089	0.159922187
EWPY	BS00066468_51	7A	323.5427478	323.040231	327	tplb0045p11_893	wsnp_Ku_c19251_28705893	BS00066468_51	3.13E-05	0.010254305	0.219070114	-0.058109038	0.10710507	0.034588719	NA	-0.111965044	0.011288214	-0.054282547	0.071374627
EWPY_FK16	AX-95162604	1B	59.4358173	49	67.68437882	RFL_Contig2160_617	BS00087784_51	AX-95162604	3.60E-06	0.064500372	0.668550642	-0.115586066	0.011999214	-0.292810608	0.000504582	0.281792979	0.358857905	-0.309692737	0.064934731
EWPY_FK16	loc204	2B	204	197	212	AX-94922346	Ra_c71978_532	AX-94922346	4.67E-07	0.065808006	0.576870273	NA	0.118009934	NA	NA	-0.446902178	0.077510569	0.129968095	0.121413579
EWPY_FK16	loc155	3B	155	141.3964392	160	TA001218.0519	AX-94761027	TA001218.0519	2.81E-05	0.051448015	0.688320276	0.016098947	0.329869282	0.042335113	-0.056010865	0.349009219	-0.311629348	-0.030361292	-0.339311057
EWPY_MR17	Kukri_rep_c94009_116	2B	160.9323076	150	167	wsnp_JD_rep_c64505_41132927	RAC875_c1226_652	Kukri_rep_c94009_116	3.59E-05	0.077305948	0.524183621	0.18895287	0.219902207	NA	NA	-0.219878848	-0.01135058	-0.304281414	0.126655765
EWPY_MR17	loc69	6D	69	62	79	wsnp_Ra_c13881_21836489	AX-94413387	wsnp_Ra_c13881_21836489	1.56E-06	0.025190148	0.411538723	NA	-0.120460164	NA	-0.234780897	0.176757826	0.087457475	0.09102576	NA
EWPY_MR19	wsnp_Ex_c19525_28494827	6B	247.328021	237.1369506	249.8457067	Tdurum_contig12648_389	wsnp_Ex_c54772_57528275	wsnp_Ex_c19525_28494827	3.14E-07	0.031875126	0.360515344	-0.078336051	0.033994931	NA	NA	NA	NA	0.202428232	-0.158087112
EWPY_SL21	RAC875_c14885_1184	2B	243.3067673	233	249	BobWhite_rep_c64679_73	BS00111236_51	RAC875_c14885_1184	2.40E-06	0.011281047	0.759640238	NA	0.133671756	NA	NA	-0.472127778	-0.048435779	0.09937934	0.287512461
GPD	wsnp_BE406351A_Ta_2_3	2A	127.8463996	122	131.8870457	RAC875_c39665_175	AX-95196147	wsnp_BE406351A_Ta_2_3	8.28E-10	0.083652494	0.459852653	0.186497799	0.048118644	-0.05312573	-0.051196845	-0.004646831	-0.261339434	-0.062820822	0.198513218
GPD	AX-94516815	2A	230.5750944	227	234.7061458	wsnp_Ex_c5740_10081171	IAAV2861	AX-94516815	2.55E-07	0.056630826	0.635014932	0.0493748	0.278334905	0.140731498	-0.223538641	-0.356680027	-0.016361189	0.152831249	-0.024692595
GPD	loc112	3A	112	109.9333127	125	wsnp_Ku_c44089_51445136	Ku_c17569_905	wsnp_Ku_c44089_51445136	2.30E-06	0.077078937	0.887812996	0.064594649	-0.604121088	-0.012528586	-0.068664934	0.283691908	0.174716448	0.011027726	0.151283877
GPD	Kukri_c64639_120	3B	255.8599829	254.3524326	266	Excalibur_c35203_334	Kukri_c34806_112	Kukri_c64639_120	2.27E-05	0.002624825	0.356837784	0.06534907	-0.033770613	-0.072385913	-0.011266507	-0.019900454	-0.037597046	-0.123633161	0.233204624
GPD	loc12	4D	12	0	17	Excalibur_c26088_184	AX-95148759	AX-95148759	1.35E-07	0.040208965	0.338648156	NA	0.076967201	-0.207807679	NA	0.130840478	NA	NA	NA
GPD	loc61	5B	61	52	63.69694843	AX-94429321	wsnp_Ex_c10674_17400603	AX-94429321	1.90E-05	0.030903614	0.291190079	0.059255952	0.127739271	0.031052508	-0.126179252	0.032762087	-0.163450808	0.077561385	-0.038741141
GPD	RAC875_c17861_199	7A	80.42698719	78	82.46808692	AX-94535709	Tdurum_contig82438_73	RAC875_c17861_199	4.16E-11	0.044373877	0.475286215	0.088184823	-0.319266527	-0.008710254	0.079495545	-0.146695248	0.047052017	0.156019688	0.103919956
GPD	AX-94499795	7A	219.5199457	215	227	AX-95195962	Kukri_c45412_177	AX-94499795	6.50E-07	0.045034555	0.317548885	-0.13351454	-0.107870558	-0.029216769	0.182636829	-0.134912056	-0.030451601	0.110780993	0.142547702
GPD	BS00066468_51	7A	323.5427478	322	326	tplb0045p11_893	wsnp_Ku_c19251_28705893	BS00066468_51	1.64E-05	0.036832839	0.32129815	-0.147134365	0.101624762	0.092561497	NA	-0.185521513	0.135776637	0.007687798	-0.004994816
GPD_FK16	AX-95072131	2A	126.3388492	118.2211054	134.9808159	BS00055514_51	wsnp_BE406351A_Ta_2_2	AX-95072131	1.77E-07	0.084351094	0.581798024	0.296524688	0.06926317	-0.00238638	-0.2126568	0.017803296	-0.285273337	-0.122266003	0.238991366
GPD_FK16	loc113	3A	113	104	125	wsnp_Ku_c44089_51445136	Ku_c17569_905	Ku_c17569_905	7.85E-06	0.09283419	1.085900935	0.089975459	-0.702059877	0.010078503	-0.228038834	0.383841057	0.258962176	0.09957322	0.087668295
GPD_FK16	loc145	3B	145	141.3964392	156	CAP8_rep_c4453_136	AX-94428728	AX-94428728	1.93E-08	0.043886125	0.486678759	-0.03720338	0.146224868	-0.060749731	-0.026314231	0.332547519	-0.15413124	-0.142936392	-0.057437413
GPD_FK16	loc80	7A	80	78	82.46808692	AX-94535709	RAC875_c17861_199	AX-94535709	1.64E-08	0.050243039	0.684698463	0.177925767	-0.487477286	-0.01587861	0.085986831	-0.096665841	0.060716292	0.078171671	0.197221177
GPD_FK16	loc310	7A	310	306	319.9730495	RAC875_c37085_317	JD_c149_1700	JD_c149_1700	5.40E-07	0.062575792	0.585148743	-0.287250757	0.16606673	0.124432752	0.295770387	-0.289378357	0.132647739	-0.040564282	-0.101724212
GPD_GL17	Kukri_c14902_1112	2D	100.9174768	98	111	AX-95228764	AX-94989875	Kukri_c14902_1112	8.81E-06	0.062733812	0.601816211	-0.014289964	-0.047137071	-0.083530865	0.020839202	-0.071516332	-0.042680771	0.420066006	-0.181750205
GPD_GL17	loc295	5A	295	284	297.6378485	wsnp_Ex_c3136_5798185	BS00068108_51	wsnp_Ex_c3136_5798185	1.48E-06	0.083227276	0.635147412	0.150215207	0.058842132	0.161759318	0.023673456	-0.28358898	0.351558432	-0.273282189	-0.189177376
GPD_MR17	RFL_Contig1633_304	2B	136.8031444	126.5288932	147	JD_c39990_130	RAC875_c14105_66	RFL_Contig1633_304	3.19E-06	0.065321856	0.622244229	0.125526395	0.164842407	NA	NA	-0.408322286	0.096854285	-0.192822743	0.213921942
GPD_MR17	loc70	6D	70	63	79	wsnp_Ra_c13881_21836489	AX-94413387	wsnp_Ra_c13881_21836489	7.24E-07	0.012546218	0.289317437	NA	-0.045541647	NA	-0.171874436	0.117443001	0.048673864	0.051299218	NA
GPD_FD18	loc171	5B	171	161	181	RAC875_c60758_585	Tdurum_contig47071_1322	RAC875_c60758_585	6.48E-09	0.03009673	0.444233192	0.120795643	0.190375382	-0.25385781	0.062653753	-0.160095037	-0.121754611	0.126264967	0.035617714
GPD_FD18	loc155	6B	155	150.5010629	163	Tdurum_contig51640_847	tplb0021a17_853	Tdurum_contig51640_847	1.65E-06	0.054877407	0.434082478	0.160043855	-0.103878919	0.092444184	-0.187882782	-0.182393875	0.033589107	0.246199696	-0.058121264
GPD_FD18	loc44	7A	44	39	51.46762718	BS00110940_51	wsnp_Ex_c35_77935	wsnp_Ex_c35_77935	2.39E-09	0.132449511	0.78827937	0.251026312	-0.520822301	-0.134203892	0.115352988	-0.208330865	0.192748894	0.267457068	0.036771796
GPD_FD18	loc116	7B	116	106	122	AX-94395385	wsnp_Ku_c10572_17445550	wsnp_Ku_c10572_17445550	4.01E-06	0.073635316	0.45233489	0.22245723	0.047167545	0.218410284	-0.14216969	0.084793636	0.005222426	-0.22987766	-0.206003771
GPD_SL18	wsnp_Ku_c38451_47086066	6A	143.7561944	139.197409	151	BobWhite_rep_c48956_706	BS00043716_51	wsnp_Ku_c38451_47086066	2.30E-06	0.045196165	0.74891554	0.052153022	-0.06285233	NA	0.035616446	-0.381746182	NA	0.367169358	-0.010340315
GPD_SL18	loc323	7A	323	319	323.5427478	wsnp_JD_c20555_18262317	tplb0045p11_893	tplb0045p11_893	4.95E-06	0.022094672	0.845153099	-0.481006345	0.106022785	0.364146754	NA	-0.099233911	0.116308004	-0.056203856	0.049966568
GPD_MR19	RFL_Contig1633_304	2B	136.8031444	131	147	JD_c39990_130	RAC875_c14105_66	RFL_Contig1633_304	1.32E-06	0.077884116	0.546335474	0.114503846	0.092861798	NA	NA	-0.145100492	0.081751724	-0.345176175	0.201159299
GPD_MR19	loc19	4D	19	5	26	AX-95148759	TG0011	AX-95148759	2.85E-07	0.070990549	0.429207136	NA	0.183227442	-0.192121668	NA	0.219050681	NA	NA	-0.210156455
GPD_HL20	loc193	2A	193	189	196.7910046	BobWhite_c3833_815	AX-94903329	AX-94903329	3.05E-06	0.066137505	0.615765216	-0.064700555	0.143014852	0.114865383	0.196134331	-0.33016116	-0.272004411	0.285604056	-0.072752497
GPD_HL20	loc87	5D	87	81	93	AX-94797162	BS00000020_51	AX-94797162	1.38E-06	NA	#NAME?	NA	NA	NA	NA	NA	NA	NA	NA
GPD_HL20	loc219	7A	219	209	226	AX-95195962	AX-94499795	AX-95195962	8.76E-06	0.051613237	0.558743505	-0.262995732	-0.02177857	0.031249574	0.263981147	-0.117456566	-0.294762359	0.164828079	0.236934427
GPD_SL21	AX-95072131	2A	126.3388492	116	129	BS00055514_51	wsnp_BE406351A_Ta_2_2	AX-95072131	5.67E-07	0.090413544	0.779718391	0.261220629	0.135610161	-0.006403862	-0.165664169	-0.068399255	-0.429995733	-0.076090431	0.349722659
GPD_SL21	RAC875_c14885_1184	2B	243.3067673	233	251	BobWhite_rep_c64679_73	BS00111236_51	RAC875_c14885_1184	2.16E-07	0.014646415	0.83994718	NA	0.169151428	NA	NA	-0.568265774	0.001053126	0.126379815	0.271681405
GPD_SL21	RAC875_c27704_420	4A	76.5837317	66	86	AX-94459938	wsnp_Ex_c9035_15054913	RAC875_c27704_420	3.13E-05	0.054105508	1.552046364	-0.293451514	-0.149025211	0.180643829	-0.420233414	0.012690623	-0.269723785	-0.192713478	1.13181295
GPD_SL21	loc215	6B	215	207	228	RAC875_rep_c106238_237	Kukri_rep_c112678_555	Kukri_rep_c112678_555	1.11E-05	0.046705447	0.820819802	0.082294049	0.096589618	0.316217055	-0.381139455	-0.321290817	0.439680347	-0.099402316	-0.132948482
GYD	Excalibur_c6497_535	1B	73.33839063	68	76	wsnp_RFL_Contig4726_5654774	AX-94490145	Excalibur_c6497_535	1.50E-06	0.079809185	0.34826144	0.040798653	0.053797832	-0.246586351	0.101675089	0.05729587	-0.013188465	0.0061055	0.000101872
GYD	loc139	2A	139	134	143	BS00090569_51	GENE.1792_560	GENE.1792_560	4.13E-06	0.062242054	0.486966156	-0.344562769	0.0047987	0.055427213	0.037220339	0.142403387	0.020650656	0.045054136	0.039008338
GYD	BS00048067_51	4A	159.2652758	154	161.7829616	AX-94980296	AX-95099849	BS00048067_51	5.08E-06	0.075906039	0.322298853	0.02130644	-0.197853412	-0.024891388	-0.069948933	0.08828669	-0.011066004	0.069721166	0.124445441
GYD_FK16	RAC875_c45987_132	6B	239.6805671	229.4572491	249.8457067	AX-95143298	AX-94537957	RAC875_c45987_132	5.25E-05	0.074854939	0.760110499	-0.147340158	-0.157828313	0.437010851	-0.323099648	0.260766364	3.19E-05	-0.112155444	0.042614471
GYD_MR17	BS00011205_51	1B	66.17682844	60	70	TA004123.0331	RFL_Contig529_963	BS00011205_51	4.45E-10	0.085592494	0.448959716	0.078401623	0.15616012	-0.292799595	0.049829681	0.057147732	0.043350252	-0.063616434	-0.028473379
GYD_MR17	loc107	7A	107	97	117	AX-95172628	BS00024786_51	AX-95172628	3.51E-05	0.07827317	0.376288022	0.128421669	0.228573978	-0.017219463	-0.061000582	-0.110786204	-0.147714044	-0.072044094	0.051768741
GYD_MR17	loc159	7B	159	150	164	Ku_c25310_843	tplb0021f14_1700	Ku_c25310_843	1.32E-06	0.036487835	0.369213046	-0.023924231	-0.085587949	0.106083555	0.035296693	0.036248827	0.192041947	-0.082987742	-0.177171099
GYD_FD18	loc157	4A	157	151.9310346	161.2804448	IAAV1383	AX-94980296	AX-94980296	2.75E-05	0.066312425	0.526024223	-0.011463284	-0.330974388	0.011748723	0.019521	-0.008359173	0.056073517	0.068403771	0.195049834
GYD_SL18	loc180	4A	180	173	194	RAC875_rep_c100803_217	AX-94695204	AX-94695204	2.31E-07	0.088769463	0.873779257	0.014982045	-0.53380887	0.069026924	0.015895999	0.064158339	-0.095310008	0.125085186	0.339970386
GYD_SL18	loc236	6A	236	223	242	Tdurum_contig42520_585	wsnp_Ra_c11651_18855691	Tdurum_contig42520_585	9.77E-06	0.066529478	0.812069607	-0.157993564	0.341932114	0.204389836	0.12068082	0.001261655	-0.470137493	0.014829937	-0.054963305
GYD_MR19	loc107	5A	107	99	114.3110072	wsnp_Ex_c19647_28632894	IAAV2363	wsnp_Ex_c19647_28632894	4.81E-06	0.129002949	0.386335857	-0.18224216	0.01109616	0.009788299	-0.130987154	-0.086475737	0.061260597	0.113466299	0.204093697
GYD_MR19	Kukri_c65301_127	5B	100.7755894	96	105.8058591	BobWhite_c7070_196	wsnp_JD_c12186_12484832	Kukri_c65301_127	4.09E-08	0.084488547	0.335139578	-0.141196699	-0.183115648	-0.044583801	0.15202393	0.075985829	0.031477068	0.043990255	0.065419066
GYD_MR19	loc59	6B	59	52	66	AX-94769331	AX-94423840	AX-94769331	1.22E-05	0.057667144	0.267602536	-0.134937701	-0.088317521	0.124001656	0.070732028	0.033717392	-0.034724223	-0.103136466	0.132664835
GYD_MR19	wsnp_Ex_c45713_51429315	6B	245.3179538	236.131917	249.8457067	RAC875_c41444_939	RAC875_c2910_1562	wsnp_Ex_c45713_51429315	5.18E-07	0.063603622	0.520771355	-0.165420081	-0.090623201	-0.009378815	0.355351274	0.112108198	NA	-0.04092521	-0.161112165
GYD_HL20	loc69	1B	69	60	76	AX-95152103	AX-94509078	AX-95152103	2.61E-05	0.07710938	0.418041523	0.115410778	-0.049401326	-0.279175752	0.13886577	0.099525693	-0.110332897	-0.045927153	0.131034887
