# Supplementary material for: Genetics of the Inverse Relationship between Grain Yield and Grain Protein Content in Common Wheat
Source: Plants (Basel). 2022 Aug 18;11(16):2146. doi: 10.3390/plants11162146 (PMC9413592; doi:10.3390/plants11162146)
Supplement: Supplementary file 1 [file plants-11-02146-s001.zip › Table_S2.csv]

Table S2: Interval for the identification of candidate genes and the number of annotated gene models (RefSeq v1.1).
Trait	Chromosome	QTL	Start	Stop	N
GY	2A	QGy.lfl-2A	670896571	680938456	140
GY	4A	QGy.lfl-4A	727512220	737512220	180
GY	5A	QGy.lfl-5A	439559652	449559652	93
GY	6A	QGy.lfl-6A	16395403	26395403	169
GY	6B	QGy.lfl-6B	705102673	716237562	246
GPC	1A	QGpc.lfl-1A	588398978	598398978	69
GPC	2A	QGpc.lfl-2A	568395802	578395802	72
GPC	2D	QGpc.lfl-2D	151825043	359968144	813
GPC	3A	QGpc.lfl-3A	321464799	406710460	206
GPC	4A	QGpc.lfl-4A	681382511	691382511	123
GPC	4B	QGpc.lfl-4B	25861559	35861559	124
GPC	5B	QGpc.lfl-5B	690484288	717697194	385
GPC	6A	QGpc.lfl-6A	569486815	579486815	96
GPC	6B	QGpc.lfl-6B	670441937	685964594	166
GPD	2A	QGpd.lfl-2A.1	557509660	569620602	91
GPD	2A	QGpd.lfl-2A.2	740409076	750409076	191
GPD	3B	QGpd.lfl-3B	733590668	743590668	112
GPD	5B	QGpd.lfl-5B	420671719	460735459	340
GPD	7A	QGpd.lfl-7A.1	62591485	72671812	137
GPD	7A	QGpd.lfl-7A.2	620739582	640502059	173
GPD	7A	QGpd.lfl-7A.3	670388820	680388820	159
GYD	1B	QGyd.lfl-1B	273473822	283473822	26
GYD	2A	QGyd.lfl-2A	670896571	680938456	140
GYD	4A	QGyd.lfl-4A	700517563	715413139	193
GPY	1B	QGpy.lfl-1B	49887569	59887569	120
EWPY	2B	QEwpy.lfl-2B	549292554	559292554	82
EWPY	7A	QEwpy.lfl-7A	670388820	680388820	159
HD	3A	QHd.lfl-3A	654528664	664528664	123
HD	4B	QHd.lfl-4B	385279526	395279526	53
HD	5B	QHd.lfl-5B	492756715	515883087	211
HD	7A	QHd.lfl-7A	74648930	85067040	144
PH	4B	QPh.lfl-4B	347348042	357348042	10
PH	4D	QPh.lfl-4D	13781253	23781253	173
PH	6A	QPh.lfl-6A	138376642	148376642	50
PH	6D	QPh.lfl-6D	401340059	414344160	139
TGW	2A	QTgw.lfl-2A	549416237	559416237	75
TGW	2B	QTgw.lfl-2B	201113239	211117374	50
TGW	6A	QTgw.lfl-6A	446986438	456986438	77
GW	1A	QGw.lfl-1A	494807792	504807792	124
GW	2A	QGw.lfl-2A	648680935	658680935	75
GW	6A	QGw.lfl-6A	450047413	460047413	79
GW	6B	QGw.lfl-6B	153859591	163859591	82
GL	1A	QGl.lfl-1A	498312364	524470017	297
GL	1B	QGl.lfl-1B.2	635849187	645849187	148
GL	2B	QGl.lfl-2B	437569615	447569615	55
GL	3B	QGl.lfl-3B	224007953	240865384	88
GL	7A	QGl.lfl-7A.2	670113805	680396955	165
