# Supplementary material for: Genetics of the Inverse Relationship between Grain Yield and Grain Protein Content in Common Wheat
Source: Plants (Basel). 2022 Aug 18;11(16):2146. doi: 10.3390/plants11162146 (PMC9413592; doi:10.3390/plants11162146)
Supplement: Supplementary file 1 [file plants-11-02146-s001.zip › Table_S3.csv]

Table S3: Linkage map of the BMWpop.
Marker	Chromosome	Position
IAAV3919	1A	0
RAC875_c42700_264	1A	0
BS00059422_51	1A	2.04
PM3a	1A	3.05
AX-95080900	1A	11.76
wsnp_Ex_c2868_5293115	1A	11.76
AX-94518190	1A	11.76
AX-94873939	1A	11.76
BS00100774_51	1A	11.76
RFL_Contig3481_1669	1A	11.76
wsnp_Ku_c1818_3557408	1A	11.76
AX-94457604	1A	11.76
tplb0025b13_2054	1A	11.76
AX-94716901	1A	14.86
wsnp_Ex_c2868_5293485	1A	15.36
BS00056550_51	1A	15.36
RAC875_rep_c104335_293	1A	15.86
RAC875_c38756_141	1A	16.37
wsnp_Ex_rep_c106111_90308719	1A	16.87
Kukri_c2446_683	1A	16.87
AX-95200832	1A	17.88
wsnp_Ex_c7965_13520238	1A	18.89
Excalibur_c82557_201	1A	22.52
BobWhite_c39996_85	1A	22.52
wsnp_Ex_c57982_59470152	1A	22.52
AX-94633096	1A	22.52
tplb0053o08_2004	1A	23.02
Kukri_c29655_239	1A	23.02
Excalibur_c71158_54	1A	23.02
Excalibur_c5139_198	1A	23.02
RAC875_c57939_78	1A	26.11
Excalibur_c9676_163	1A	26.62
Tdurum_contig46413_680	1A	26.62
AX-94466102	1A	26.62
CAP8_c2448_355	1A	27.63
Tdurum_contig43943_56	1A	27.63
AX-95239997	1A	28.13
AX-94976542	1A	28.13
AX-94679841	1A	28.13
AX-95215584	1A	29.14
Kukri_c29150_143	1A	29.64
AX-95198429	1A	30.14
Tdurum_contig42479_3800	1A	34.31
AX-94605574	1A	34.31
AX-94577477	1A	34.31
AX-94952968	1A	34.31
BS00003761_51	1A	34.31
GENE.0449_141	1A	34.81
Tdurum_contig61492_684	1A	35.32
RAC875_c54245_88	1A	35.32
BobWhite_c46501_92	1A	35.82
BS00039749_51	1A	36.32
BS00022738_51	1A	36.82
RAC875_c34888_65	1A	40.19
Tdurum_contig83113_134	1A	43.01
Ku_c4823_673	1A	43.01
AX-95231896	1A	43.01
AX-94704082	1A	43.01
Tdurum_contig11756_458	1A	43.52
AX-94807355	1A	49.91
AX-94477156	1A	49.91
wsnp_Ex_c1137_2182795	1A	49.91
AX-95107625	1A	50.41
AX-94852713	1A	55.68
AX-94501544	1A	56.18
AX-94693693	1A	56.18
Excalibur_c25891_1402	1A	56.18
BS00081680_51	1A	56.18
AX-94581035	1A	57.19
wsnp_Ex_c19717_28713417	1A	59.76
AX-94503555	1A	61.28
AX-94682405	1A	61.78
AX-94994812	1A	63.3
AX-94742021	1A	63.3
wsnp_Ku_c5756_10191339	1A	63.3
AX-94846405	1A	66.4
Excalibur_c11941_675	1A	66.4
AX-94917012	1A	66.4
Excalibur_c10689_254	1A	66.9
CAP7_c4833_141	1A	67.4
Kukri_c22508_119	1A	68.41
AX-94682787	1A	69.42
Kukri_c12534_559	1A	69.93
GENE.0002_856	1A	70.43
Kukri_c31964_56	1A	70.93
Tdurum_contig8382_300	1A	70.93
AX-94443825	1A	71.43
Tdurum_contig29280_216	1A	71.94
Tdurum_contig50355_269	1A	71.94
RAC875_c89908_105	1A	72.44
Excalibur_c12215_352	1A	72.44
IAAV5652	1A	72.44
TA003773.0807	1A	72.44
RAC875_c826_2186	1A	72.44
wsnp_BF484606A_Ta_2_3	1A	72.44
RAC875_c10090_963	1A	72.44
AX-95233488	1A	72.44
AX-95087496	1A	77.15
RFL_Contig3232_1224	1A	77.66
IACX5982	1A	77.66
AX-95079481	1A	77.66
BobWhite_c4646_119	1A	77.66
Tdurum_contig9199_714	1A	77.66
AX-94488826	1A	77.66
Kukri_c32885_145	1A	85.78
AX-94397743	1A	86.28
Kukri_c47825_138	1A	87.3
Ex_c5759_628	1A	87.8
AX-95174732	1A	88.3
Kukri_rep_c101316_375	1A	88.3
BobWhite_c478_1386	1A	89.82
BS00064679_51	1A	89.82
wsnp_Ex_c8885_14842394	1A	90.83
wsnp_Ku_c30921_40705731	1A	91.84
IAAV4916	1A	91.84
wsnp_BE585780A_Ta_2_1	1A	91.84
Kukri_rep_c103147_745	1A	93.37
AX-94639099	1A	94.89
AX-94734853	1A	94.89
RAC875_c11899_366	1A	94.89
BS00066852_51	1A	96.93
BS00074517_51	1A	96.93
Kukri_rep_c101022_1595	1A	96.93
IACX6344	1A	96.93
Tdurum_contig55009_1153	1A	97.94
BS00087437_51	1A	98.95
BS00086680_51	1A	98.95
wsnp_Ku_c37925_46679146	1A	100.99
wsnp_Ex_c35563_43690084	1A	100.99
IAAV7203	1A	101.49
wsnp_Ku_c4018_7333828	1A	101.49
wsnp_Ex_rep_c69738_68695568	1A	102
Kukri_c12165_1148	1A	102.5
TA001772.0625	1A	102.5
wsnp_Ex_rep_c101414_86781128	1A	103
BobWhite_c46349_402	1A	103.5
AX-95002032	1A	104.51
tplb0041a22_935	1A	108.68
IACX11338	1A	113.4
GENE.0410_71	1A	113.4
Kukri_c25215_124	1A	113.9
wsnp_Ex_c21336_30465618	1A	113.9
AX-94583334	1A	114.4
wsnp_Ex_c21193_30320134	1A	114.4
AX-94428309	1A	114.4
AX-94796020	1A	114.4
BS00021714_51	1A	114.91
BS00032112_51	1A	116.43
BS00022733_51	1A	117.44
AX-94679138	1A	118.96
wsnp_Ra_c16080_24638622	1A	122.06
Excalibur_c49421_443	1A	123.07
RAC875_c54380_249	1A	123.07
IACX742	1A	123.07
AX-95225890	1A	123.07
IACX4378	1A	123.07
Kukri_c52952_315	1A	123.57
RAC875_c43643_176	1A	123.57
wsnp_Ra_c12148_19539667	1A	123.57
BS00002216_51	1A	124.07
IAAV2072	1A	124.07
RFL_Contig3203_1971	1A	124.57
BS00087601_51	1A	124.57
wsnp_Ex_c5216_9235964	1A	124.57
AX-94755260	1A	124.57
Kukri_c10239_2186	1A	125.08
BS00087600_51	1A	125.58
AX-95102105	1A	126.08
BobWhite_rep_c49207_243	1A	126.08
Kukri_c3582_87	1A	126.08
wsnp_Ku_c557_1166684	1A	126.08
Ex_c8514_1342	1A	126.08
wsnp_Ex_c56097_58351893	1A	126.08
BS00022318_51	1A	126.08
AX-95110122	1A	126.58
BS00016654_51	1A	130.75
AX-94542559	1A	131.26
AX-94478919	1A	131.26
tplb0046g22_1351	1A	132.78
RAC875_c86680_391	1A	134.3
BobWhite_c38865_319	1A	134.8
AX-94600055	1A	134.8
IACX18883	1A	134.8
Kukri_c88698_296	1A	134.8
wsnp_Ex_c10257_16825240	1A	137.37
Ex_c25689_1606	1A	137.37
Kukri_rep_c101946_496	1A	137.37
wsnp_Ex_rep_c66846_65240088	1A	137.37
RFL_Contig530_2305	1A	138.89
TA002594.0782	1A	139.39
IACX5960	1A	151.82
wsnp_BE445113A_Ta_2_2	1A	152.32
wsnp_BE445113A_Ta_2_1	1A	152.32
RAC875_rep_c112044_340	1A	152.82
Kukri_rep_c117029_125	1A	153.33
wsnp_Ra_c3270_6136601	1A	153.33
wsnp_Ku_c21316_31053745	1A	153.83
AX-94462123	1A	154.33
CAP12_c1906_217	1A	154.83
Kukri_c30322_414	1A	154.83
wsnp_Ex_rep_c109742_92411838	1A	155.34
AX-95235178	1A	155.84
RAC875_c37545_289	1A	156.85
AX-94919955	1A	156.85
BS00064638_51	1A	157.1
BS00067742_51	1A	157.1
wsnp_Ex_rep_c108951_91954190	1A	160.19
RAC875_c29540_1109	1A	160.19
AX-94631158	1A	160.19
Ku_c1313_1673	1A	160.19
wsnp_Ku_c1642_3232242	1A	160.19
Kukri_c29039_315	1A	160.19
Kukri_c39377_286	1A	160.19
wsnp_Ex_c1997_3757415	1A	161.72
wsnp_Ex_c1997_3755945	1A	161.72
Excalibur_c44668_382	1A	162.22
AX-95239187	1A	162.22
Kukri_c58155_786	1A	162.22
wsnp_Ku_c23012_32893918	1A	165.31
Excalibur_c1845_4911	1A	167.88
AX-94527824	1A	168.38
RAC875_c12993_201	1A	168.88
wsnp_BM140362A_Ta_2_2	1A	169.38
wsnp_Ex_c32590_41222878	1A	169.38
TG0045	1A	169.38
AX-94661184	1A	169.89
AX-94618537	1A	170.39
Kukri_c1313_1158	1A	171.4
RFL_Contig22_387	1A	172.92
Kukri_c54678_88	1A	173.42
RFL_Contig22_617	1A	173.93
wsnp_CAP12_c1960_972031	1A	174.43
AX-94644377	1A	174.93
wsnp_Ra_c33025_41968284	1A	174.93
wsnp_Ra_c11877_19161832	1A	174.93
BS00021728_51	1A	174.93
RAC875_c24047_284	1A	174.93
wsnp_Ku_c15214_23756800	1A	174.93
AX-94629074	1A	174.93
wsnp_Ex_c9722_16062937	1A	174.93
wsnp_JD_c6544_7697578	1A	174.93
AX-94548062	1A	174.93
BobWhite_c96_170	1A	175.94
TA002402.1350	1A	177.98
Ra_c64515_242	1A	177.98
Ku_c10813_1122	1A	177.98
wsnp_Ex_c1997_3757721	1A	177.98
AX-94681397	1A	177.98
BobWhite_c26122_129	1A	177.98
Excalibur_c1066_303	1A	178.99
AX-94440483	1A	179.5
Ku_c8992_405	1A	185.89
Excalibur_c97157_65	1A	185.89
AX-95146857	1A	185.89
Excalibur_c47013_1503	1A	185.89
AX-94690269	1A	190.06
Ra_c110766_321	1A	191.07
wsnp_Ex_c41953_48658353	1A	191.07
wsnp_JD_c3973_5044238	1A	191.07
wsnp_Ex_c41953_48657850	1A	191.07
RAC875_rep_c72890_63	1A	191.07
TA001600.1603	1A	191.07
GENE.0033_233	1A	192.59
IAAV7172	1A	192.59
IACX7789	1A	193.6
AX-94467726	1A	194.1
RFL_Contig5334_831	1A	194.6
wsnp_Ex_rep_c102067_87314043	1A	195.11
wsnp_CAP8_c4785_2322876	1A	195.61
AX-94879161	1A	195.61
BS00070580_51	1A	195.61
AX-94532291	1A	195.61
AX-95162673	1A	197.13
BobWhite_c22134_398	1A	198.14
wsnp_Ex_rep_c81556_76277906	1A	203.97
wsnp_Ex_c28149_37293173	1A	204.47
wsnp_BF474340A_Ta_2_1	1A	209.74
AX-94969179	1A	210.24
wsnp_Ex_c6488_11266589	1A	210.75
AX-94690045	1A	210.75
BS00030043_51	1A	210.75
Jagger_c468_53	1A	210.75
Tdurum_contig56662_54	1A	210.75
Ku_c3523_1959	1A	210.75
wsnp_Ku_rep_c109724_94227136	1A	210.75
Excalibur_c1936_1072	1A	210.75
Tdurum_contig18174_283	1A	210.75
RAC875_c34515_343	1A	210.75
AX-94711993	1A	210.75
CAP12_c8163_118	1A	210.75
Tdurum_contig81011_244	1A	210.75
Excalibur_c66_147	1A	210.75
AX-94463854	1A	211.25
RAC875_rep_c71278_345	1A	212.26
wsnp_JD_c12333_12595897	1A	212.26
BS00065170_51	1A	212.26
BS00062759_51	1A	212.26
AX-94664571	1A	212.26
AX-94385756	1A	212.26
AX-94892480	1A	212.26
AX-94437898	1A	212.51
AX-94788925	1A	215.07
BS00035273_51	1A	216.08
wsnp_Ex_rep_c72011_70562321	1A	217.09
AX-95151237	1A	220.19
BS00070695_51	1A	220.19
AX-94789084	1A	220.19
BobWhite_c66315_505	1A	220.19
BobWhite_c44947_277	1A	220.19
Kukri_c44369_131	1B	0
AX-94381338	1B	0
AX-94647324	1B	0
Excalibur_c21898_1423	1B	0
Excalibur_c29707_318	1B	0.5
BS00050522_51	1B	0.5
Excalibur_c10657_796	1B	0.5
RAC875_c400_1363	1B	1
Tdurum_contig78972_316	1B	14.72
RFL_Contig4140_1135	1B	21.11
AX-94569385	1B	26.38
BS00105833_51	1B	26.88
AX-94692514	1B	30.51
Kukri_c92979_195	1B	31.02
wsnp_BE637971B_Ta_1_20	1B	31.02
RFL_Contig5637_1008	1B	31.02
AX-95234267	1B	31.02
IACX3811	1B	31.02
AX-94939233	1B	31.02
Ku_c1312_1194	1B	31.02
Tdurum_contig14847_144	1B	31.02
AX-94759371	1B	31.02
Excalibur_c3270_1566	1B	33.06
AX-94961642	1B	33.06
BS00068182_51	1B	33.06
Ku_c31363_2165	1B	33.06
RFL_Contig1118_1073	1B	33.56
Excalibur_c55959_651	1B	33.56
BS00110121_51	1B	33.56
AX-94912445	1B	34.06
AX-94982235	1B	35.07
AX-94861646	1B	35.57
AX-95245523	1B	36.08
AX-95182696	1B	36.08
AX-94769850	1B	36.08
BS00011695_51	1B	36.08
IAAV4194	1B	37.09
D_F5XZDLF02I14SZ_56	1B	37.09
CAP7_c3847_204	1B	37.09
Tdurum_contig50667_306	1B	37.09
AX-94921660	1B	45.8
Kukri_c29655_194	1B	45.8
GENE.1756_115	1B	45.8
wsnp_Ex_c5780_10153638	1B	45.8
AX-94863306	1B	45.8
AX-94796921	1B	52.77
BS00067003_51	1B	53.27
BS00022590_51	1B	53.77
AX-95196278	1B	53.77
RFL_Contig2160_617	1B	56.34
AX-95162604	1B	59.43
Kukri_c34793_360	1B	59.43
BS00087784_51	1B	64.15
TA004123.0331	1B	65.67
BS00011205_51	1B	66.17
wsnp_Ex_c25782_35041189	1B	66.17
RFL_Contig529_963	1B	66.67
BS00093231_51	1B	66.67
wsnp_Ex_c12063_19310114	1B	66.67
Tdurum_contig75938_1546	1B	66.67
wsnp_Ex_c28287_37424983	1B	67.18
AX-95152103	1B	67.68
AX-94413562	1B	67.68
AX-94990715	1B	67.68
AX-94835306	1B	67.68
RAC875_rep_c109416_191	1B	67.68
wsnp_Ex_c2111_3963161	1B	67.68
RAC875_c826_839	1B	67.68
AX-94509078	1B	71.31
AX-94440361	1B	71.31
wsnp_RFL_Contig4726_5654774	1B	72.83
BobWhite_c4236_410	1B	72.83
Excalibur_c6497_535	1B	73.33
AX-94490145	1B	73.84
AX-94621346	1B	73.84
AX-94454402	1B	79.66
wsnp_BE405749B_Ta_2_1	1B	80.17
AX-94602901	1B	80.17
BS00105846_51	1B	80.67
BS00108057_51	1B	80.67
BS00108058_51	1B	80.67
AX-94903145	1B	81.17
BS00089524_51	1B	81.67
AX-94875742	1B	81.67
Kukri_c8390_1102	1B	84.77
AX-94417784	1B	88.94
AX-95182782	1B	88.94
Excalibur_c3801_814	1B	89.44
Kukri_rep_c101799_95	1B	89.44
BS00065139_51	1B	89.44
wsnp_Ra_c8506_14401408	1B	89.44
wsnp_BE399980B_Ta_2_1	1B	89.44
AX-95208619	1B	89.44
wsnp_Ku_rep_c71900_71624324	1B	89.44
AX-94893742	1B	90.45
AX-94616791	1B	90.95
wsnp_Ra_c21132_30487331	1B	91.45
Ra_c16069_1820	1B	91.96
TA004324.0491	1B	92.46
AX-94433968	1B	92.96
Kukri_c84940_106	1B	93.46
Kukri_rep_c111517_289	1B	93.97
Excalibur_c27675_912	1B	93.97
Excalibur_s113941_196	1B	94.47
BS00091191_51	1B	94.47
CAP7_c1241_128	1B	94.47
AX-94470119	1B	94.47
wsnp_BE443531B_Ta_1_1	1B	94.97
Kukri_c147_1620	1B	95.47
wsnp_BE637864B_Ta_1_1	1B	95.47
RAC875_rep_c72356_51	1B	95.47
BobWhite_c8218_162	1B	95.47
IAAV1364	1B	95.47
AX-94481774	1B	99.1
CAP11_c2974_53	1B	99.6
AX-94433161	1B	100.11
IACX10809	1B	100.11
TA003725.0553	1B	100.61
Excalibur_c34625_281	1B	100.61
AX-94692952	1B	101.11
IAAV6731	1B	101.61
BS00022920_51	1B	102.12
AX-95176659	1B	102.62
JD_c3116_778	1B	103.12
Kukri_c4412_383	1B	103.62
RAC875_rep_c98040_163	1B	103.62
Tdurum_contig60509_232	1B	103.62
wsnp_Ra_c5088_9081927	1B	104.13
GENE.3626_308	1B	104.13
wsnp_BG606586B_Ta_2_13	1B	109.4
GENE.0136_82	1B	113.02
RAC875_c8888_802	1B	116.65
BS00010130_51	1B	116.65
BS00036362_51	1B	117.15
Kukri_c559_193	1B	117.66
wsnp_JD_c11014_11565501	1B	118.16
CAP12_c424_402	1B	119.68
AX-94638030	1B	119.68
wsnp_Ex_c1600_3051075	1B	120.19
BobWhite_c33506_732	1B	122.75
AX-94490210	1B	126.92
AX-94504071	1B	126.92
Kukri_c22155_1010	1B	126.92
AX-94881376	1B	126.92
RAC875_c6701_291	1B	126.92
CAP7_c12162_251	1B	126.92
wsnp_Ex_c852_1657319	1B	126.92
Tdurum_contig50473_889	1B	126.92
AX-94663988	1B	126.92
BS00065889_51	1B	132.19
wsnp_Ex_c53976_57027635	1B	132.19
AX-94639048	1B	132.19
RFL_Contig5706_1294	1B	132.19
wsnp_BF485168B_Ta_2_1	1B	133.2
wsnp_Ex_c17452_26163465	1B	134.21
Kukri_c27693_260	1B	137.84
AX-95182909	1B	137.84
AX-94451977	1B	137.84
IACX11029	1B	137.84
BS00011973_51	1B	138.34
RAC875_c7674_634	1B	138.34
BS00048610_51	1B	138.84
AX-94653005	1B	138.84
Excalibur_c40993_1129	1B	141.93
BS00073132_51	1B	142.44
Ra_c25590_1406	1B	145.53
Tdurum_contig8158_269	1B	154.85
RAC875_c45678_1083	1B	154.85
AX-94462858	1B	155.86
BS00107749_51	1B	155.86
BS00021975_51	1B	155.86
AX-94922385	1B	155.86
RAC875_c32687_153	1B	155.86
BobWhite_rep_c57575_65	1B	155.86
Excalibur_c14911_976	1B	157.9
BS00064032_51	1B	158.91
Tdurum_contig48523_1838	1B	158.91
BS00067769_51	1B	158.91
RAC875_c16391_426	1B	158.91
BS00088039_51	1B	158.91
IAAV3567	1B	158.91
BS00001835_51	1B	160.43
wsnp_Ex_rep_c66389_64588992	1B	161.95
AX-94652226	1B	163.48
RAC875_rep_c109215_398	1B	164.49
Excalibur_c60931_1260	1B	165.5
Tdurum_contig42797_2922	1B	166.51
AX-95122579	1B	166.51
AX-94891105	1B	166.51
IACX9308	1B	166.51
AX-95152246	1B	166.51
BS00089563_51	1B	167.01
wsnp_Ex_c58292_59652859	1B	168.02
IACX4461	1B	168.02
AX-94897199	1B	168.02
wsnp_Ex_c18462_27305612	1B	168.02
CAP8_c818_370	1B	168.02
RFL_Contig4235_707	1B	181.74
AX-94581937	1B	181.74
BS00067627_51	1B	181.74
IAAV3802	1B	182.24
Tdurum_contig30517_174	1B	182.24
Tdurum_contig30517_578	1B	182.24
wsnp_Ex_c23230_32466568	1B	182.24
wsnp_Ex_c15611_23929128	1B	182.24
wsnp_Ex_rep_c107911_91350930	1B	182.24
Excalibur_c10496_651	1B	182.24
Tdurum_contig13117_1316	1B	182.75
wsnp_Ex_c5101_9052671	1B	183.25
wsnp_Ex_c7585_12957020	1B	183.75
Ku_c956_1797	1B	183.75
Ex_c11930_509	1B	183.75
AX-94873552	1B	183.75
wsnp_Ku_rep_c89089_82009060	1B	183.75
Kukri_c8143_355	1B	184.26
Kukri_c25961_166	1B	184.26
BobWhite_c14141_197	1B	184.26
Excalibur_c64439_87	1B	187.35
wsnp_Ex_c1412_2711077	1B	188.36
BS00040743_51	1B	188.36
AX-94385355	1B	188.36
Kukri_c20486_255	1B	188.36
RAC875_c31031_387	1B	189.37
BS00066944_51	1B	189.37
wsnp_Ex_c27644_36826484	1B	190.38
IACX886	1B	194.55
BobWhite_c48071_144	1B	204.47
RFL_Contig2826_548	1B	204.47
wsnp_BE590634B_Ta_2_5	1B	204.47
IACX1891	1B	204.47
Tdurum_contig10362_328	1B	204.47
TA003586.0637	1B	204.47
BS00067024_51	1B	204.47
wsnp_BE494527B_Ta_2_1	1B	204.97
IACX1240	1B	204.97
Excalibur_c28045_741	1B	204.97
BS00022851_51	1B	204.97
AX-95085467	1B	204.97
BS00063928_51	1B	205.98
RFL_Contig5937_1677	1B	205.98
wsnp_Ex_c194_381656	1B	205.98
BobWhite_c42716_71	1B	206.49
AX-95255439	1B	210.66
BS00110231_51	1B	214.28
wsnp_Ex_c18384_27213023	1B	214.79
Tdurum_contig47253_1624	1B	217.88
Ku_c16636_347	1B	220.97
Excalibur_rep_c72368_68	1B	221.48
AX-95253773	1B	221.98
Tdurum_contig11077_122	1B	227.81
AX-95201086	1B	228.31
BS00069829_51	1B	229.32
AX-94446956	1B	229.32
AX-94496629	1B	231.88
BS00022249_51	1B	232.89
BS00096498_51	1B	233.4
IACX2961	1B	233.4
Ra_c17685_927	1B	233.4
tplb0043k02_463	1B	233.4
Jagger_c7235_96	1B	233.4
BobWhite_c2844_569	1B	233.4
BS00039135_51	1B	233.4
BS00072791_51	1B	233.4
Excalibur_rep_c70674_83	1B	233.4
AX-95259256	1B	233.9
wsnp_Ex_rep_c67098_65573819	1B	234.91
tplb0034e16_1165	1B	234.91
Tdurum_contig32775_78	1B	236.43
IAAV1683	1B	236.93
TA004946.0577	1B	236.93
Kukri_c30159_573	1B	236.93
AX-94948241	1B	237.44
Kukri_c4453_1248	1B	237.94
Excalibur_c34765_1023	1B	238.44
RAC875_c15593_1421	1B	238.94
BobWhite_c13124_430	1B	243.66
RAC875_c839_352	1B	249.49
AX-94955390	1B	249.49
RAC875_c46093_492	1B	249.49
AX-94719582	1B	249.49
BS00022176_51	1B	254.2
Kukri_c51735_79	1B	254.2
Kukri_c63336_621	1B	254.7
AX-94773580	1B	254.7
AX-94950893	1B	255.71
BobWhite_c26569_190	1B	256.22
tplb0043a07_880	1B	256.72
AX-94618000	1B	260.89
IAAV565	1B	261.39
Excalibur_c49496_705	1B	261.39
BS00064052_51	1B	261.39
Tdurum_contig8840_575	1B	263.96
AX-94524314	1B	264.97
Tdurum_contig75731_537	1B	265.22
BS00045568_51	1B	265.22
Excalibur_c22205_573	1B	265.72
Tdurum_contig68980_317	1B	265.72
BobWhite_c9091_160	1B	265.72
AX-94632981	1B	269.35
AX-94900228	1B	269.35
AX-94780679	1B	271.91
AX-94761084	1B	274.48
D_contig12192_450	1B	274.48
IACX2984	1B	274.48
Tdurum_contig13250_137	1B	280.58
GENE.0063_68	1B	280.58
CAP8_c5043_190	1B	280.58
tplb0034p10_1134	1B	281.09
BS00068077_51	1B	281.09
Excalibur_c7684_54	1B	287.48
BS00032040_51	1B	287.48
AX-94489390	1B	295.02
BS00071893_51	1B	296.03
BobWhite_c44460_821	1B	296.03
AX-95226038	1B	296.53
Kukri_rep_c102102_273	1B	297.04
RAC875_rep_c111494_195	1B	297.04
BS00075129_51	1B	297.54
RAC875_c55934_165	1B	299.58
GENE.0115_375	1B	299.58
Kukri_c30490_328	1B	299.58
BobWhite_c9963_51	1B	299.58
Excalibur_c88292_81	1B	299.58
AX-95257543	1B	300.08
Kukri_rep_c102001_420	1B	300.58
Excalibur_rep_c71107_517	1B	300.58
AX-95139868	1B	301.59
AX-94817502	1B	302.1
RAC875_c4047_115	1B	302.1
RFL_Contig785_535	1B	303.11
IAAV5776	1B	303.11
BobWhite_c4482_73	1B	303.11
BobWhite_c20073_382	1B	303.61
Excalibur_c35289_64	1B	304.11
AX-94758722	1B	304.61
BS00024107_51	1B	304.61
Tdurum_contig45965_563	1B	306.14
AX-94522424	1B	306.14
AX-94411695	1B	306.14
D_contig03023_692	1B	307.15
CAP7_rep_c6352_375	1B	309.19
BS00037246_51	1B	309.69
AX-94855067	1B	310.19
Kukri_c8395_1352	1B	310.7
AX-94945293	1B	310.7
BS00023105_51	1B	312.22
GENE.0514_210	1B	312.72
IAAV3040	1B	312.72
Tdurum_contig93330_656	1B	312.72
AX-94862571	1B	312.72
AX-94730675	1B	318.83
wsnp_Ex_c38849_46284348	1B	318.83
AX-95076278	1B	318.83
BS00060686_51	1B	328.75
AX-94956073	1B	328.75
BS00107837_51	1B	328.75
RAC875_c9770_123	1B	328.75
TA002645.0060	1B	328.75
Tdurum_contig42558_134	1B	328.75
Excalibur_rep_c69522_83	1B	334.02
AX-94860684	1B	338.74
AX-95202607	1B	339.24
AX-94528856	1B	339.24
BS00063537_51	1B	339.74
AX-95130954	1B	340.24
AX-95105440	1B	341.25
BS00066305_51	1B	341.25
BS00011892_51	1B	341.25
BS00036189_51	1B	341.76
BS00093275_51	1B	342.26
BS00084990_51	1B	342.26
Excalibur_c25640_110	1B	345.89
wsnp_Ku_c13952_22097895	1B	346.39
wsnp_Ku_c13952_22097856	1B	346.89
wsnp_BE446672B_Ta_2_1	1B	347.39
BS00027006_51	1B	347.39
Tdurum_contig9144_222	1B	347.39
AX-95179433	1B	355.52
wsnp_CAP11_c2596_1325540	1B	355.52
AX-94575968	1D	0
RAC875_c17026_714	1D	0.5
Kukri_c26168_713	1D	11.65
GENE.0014_822	1D	11.65
TA002086.1469	1D	12.16
Kukri_c36351_64	1D	12.16
D_GDS7LZN02IXNP1_255	1D	12.16
Excalibur_c43567_679	1D	17.98
AX-94772107	1D	18.49
BobWhite_c33756_74	1D	30.91
RAC875_c16352_594	1D	30.91
D_GB5Y7FA02I369B_378	1D	30.91
Excalibur_c15692_532	1D	30.91
Kukri_c8211_159	1D	34
AX-94815880	1D	36.57
RAC875_c2040_564	1D	36.57
AX-94874878	1D	36.57
BS00023049_51	1D	36.57
CAP8_c1305_148	1D	37.07
AX-94914889	1D	37.07
AX-94531706	1D	37.07
AX-94418622	1D	39.64
BS00022178_51	1D	39.64
AX-94820348	1D	39.64
Excalibur_c24303_1145	1D	40.14
AX-94606615	1D	40.64
D_contig13475_402	1D	43.73
IACX9354	1D	43.73
AX-94814992	1D	43.73
IACX11290	1D	50.7
Kukri_c6167_1271	1D	54.33
BS00072193_51	1D	54.33
BS00065722_51	1D	54.33
AX-95171082	1D	54.33
TA001371.0399	1D	54.33
AX-94491903	1D	54.33
TA006455.0918	1D	54.33
AX-94565950	1D	54.33
wsnp_Ex_c1130_2166731	1D	54.33
AX-95216172	1D	54.33
Ra_c4899_609	1D	54.33
BS00032149_51	1D	61.87
IACX11283	1D	61.87
BS00066976_51	1D	61.87
AX-94614313	1D	62.37
wsnp_BE424100D_Ta_1_1	1D	63.38
TA003135.0494	1D	64.9
AX-94476240	1D	67.47
AX-94893744	1D	75.59
AX-94556277	1D	76.1
AX-95008943	1D	79.72
BS00066446_51	1D	81.77
D_contig14507_369	1D	82.78
BS00060042_51	1D	83.53
RAC875_rep_c105196_532	1D	83.53
RAC875_c33279_526	1D	87.7
IAAV4656	1D	87.7
wsnp_Ex_c10959_17801482	1D	88.2
Ra_c21676_178	1D	99.36
RAC875_c43831_91	1D	99.36
Excalibur_c8188_693	1D	99.36
IAAV2840	1D	99.36
AX-94868799	1D	99.36
RAC875_c54260_127	1D	99.36
wsnp_Ex_c25974_35235456	1D	99.36
AX-94774962	1D	99.36
D_contig06122_208	1D	99.36
TA004358.0724	1D	99.36
wsnp_Ex_c27290_36498462	1D	99.36
RAC875_c3604_1527	1D	99.36
wsnp_Ku_c7266_12551048	1D	99.36
wsnp_Ku_c5560_9853214	1D	99.36
D_GA8KES401EYUM8_190	1D	99.86
wsnp_Ex_c15396_23659859	1D	99.86
IAAV868	1D	99.86
wsnp_Ex_c3831_6966926	1D	99.86
RAC875_c4135_1028	1D	99.86
TA004476.0719	1D	99.86
IAAV5841	1D	100.36
GENE.0511_484	1D	100.87
BS00021702_51	1D	100.87
wsnp_Ex_rep_c66423_64641115	1D	101.37
GENE.0315_356	1D	101.87
BS00075001_51	1D	102.37
BobWhite_c6998_365	1D	102.88
Ra_c3045_2659	1D	104.92
RAC875_c32452_55	1D	105.42
TA023346.0392	1D	105.42
Excalibur_c53900_86	1D	106.43
Ra_c3045_1739	1D	106.93
wsnp_Ex_c9577_15855968	1D	107.44
IAAV6648	1D	107.94
RAC875_c46460_1128	1D	108.44
RAC875_c1211_3475	1D	109.45
Ku_c3647_1443	1D	112.54
Excalibur_c50856_63	1D	114.07
Ra_c1211_1656	1D	115.08
BS00066188_51	1D	116.6
RAC875_c35846_671	1D	117.1
RAC875_c87321_108	1D	118.11
wsnp_Ex_c18665_27541568	1D	118.11
Excalibur_c48317_242	1D	118.11
TA012861.0741	1D	119.64
BS00003816_51	1D	119.64
AX-94603856	1D	124.9
AX-95108137	1D	124.9
BS00022188_51	1D	124.9
wsnp_Ex_c11950_19164191	2A	0
AX-94767021	2A	0
BobWhite_c13373_250	2A	0.5
wsnp_Ku_c23598_33524490	2A	1.51
wsnp_Ex_c36049_44083089	2A	1.51
Excalibur_rep_c67619_217	2A	1.51
wsnp_Ku_c10418_17237935	2A	1.51
Ex_c19516_3687	2A	1.51
TA002095.0637	2A	1.51
wsnp_Ku_c33374_42877546	2A	2.52
AX-94956032	2A	2.52
AX-94802588	2A	3.53
Kukri_c40204_141	2A	7.7
Excalibur_c32668_467	2A	8.71
RFL_Contig174_406	2A	12.88
wsnp_Ex_c2772_5130007	2A	12.88
Excalibur_c21663_145	2A	14.4
AX-94510523	2A	15.41
AX-94406025	2A	15.41
AX-94824007	2A	15.91
RAC875_rep_c113106_93	2A	15.91
BobWhite_c12426_84	2A	15.91
Tdurum_contig11802_864	2A	15.91
TA002254.0660	2A	15.91
Excalibur_c18324_390	2A	15.91
IACX6178	2A	15.91
D_contig01272_220	2A	16.41
AX-94629608	2A	16.92
AX-94893801	2A	16.92
IAAV8501	2A	16.92
BS00067382_51	2A	16.92
AX-94910560	2A	20.55
AX-94446514	2A	20.55
Kukri_c35248_185	2A	22.59
AX-94490072	2A	23.09
Kukri_c3882_2021	2A	23.09
Excalibur_c12177_285	2A	23.09
IACX11417	2A	23.09
RAC875_c829_1143	2A	23.09
AX-94971243	2A	23.09
RAC875_c47161_100	2A	23.09
RAC875_c26214_505	2A	23.09
BS00022532_51	2A	23.09
RAC875_c829_1215	2A	24.61
AX-95177447	2A	32.15
wsnp_RFL_Contig3790_4082085	2A	32.15
BS00003867_51	2A	32.15
AX-94992901	2A	32.15
RAC875_c15909_686	2A	32.15
RAC875_rep_c88665_52	2A	32.15
wsnp_BF201235A_Ta_2_4	2A	32.15
AX-94516947	2A	43.31
BS00004724_51	2A	43.31
wsnp_Ex_rep_c103167_88182254	2A	43.31
AX-95255993	2A	43.31
AX-94381641	2A	43.31
RAC875_rep_c78744_228	2A	43.31
CAP11_c2293_200	2A	43.31
AX-94594842	2A	44.32
BS00022982_51	2A	46.36
AX-94717890	2A	48.93
BobWhite_c2022_245	2A	49.43
CAP8_rep_c8022_270	2A	49.93
RAC875_c11652_544	2A	50.43
GENE.0137_1624	2A	51.96
AX-94578476	2A	51.96
wsnp_Ex_c15740_24096817	2A	52.97
Ku_c23118_149	2A	53.47
GENE.0749_215	2A	53.97
BS00076693_51	2A	54.98
RAC875_c14944_555	2A	57.02
wsnp_Ex_c19556_28530231	2A	57.53
BobWhite_c26374_339	2A	58.03
wsnp_Ex_c19556_28530243	2A	58.53
AX-94413813	2A	60.57
AX-94664024	2A	62.09
BS00066186_51	2A	62.6
wsnp_JD_rep_c48914_33168544	2A	65.16
AX-94682021	2A	65.16
Excalibur_rep_c105284_110	2A	68.79
AX-94648074	2A	70.83
AX-95098442	2A	71.33
Kukri_c1728_1876	2A	71.84
IAAV2654	2A	71.84
wsnp_Ex_c5412_9564478	2A	72.59
Ra_c58279_702	2A	72.59
wsnp_Ex_c5412_9564346	2A	72.59
Ra_c58279_684	2A	72.59
Excalibur_c26918_75	2A	72.59
AX-94616756	2A	77.86
wsnp_Ku_c1292_2572053	2A	79.38
AX-95242673	2A	83.01
RAC875_c17787_274	2A	84.02
IAAV7468	2A	84.02
RAC875_c4015_2175	2A	86.59
Ku_c57425_413	2A	89.68
JD_c3930_358	2A	91.72
Kukri_rep_c73477_888	2A	92.73
wsnp_Ex_c2887_5330426	2A	92.73
Excalibur_c6808_959	2A	94.25
IACX2067	2A	94.25
BS00083146_51	2A	98.97
BS00045900_51	2A	99.47
BobWhite_c1611_1685	2A	99.98
BS00085308_51	2A	100.48
wsnp_Ex_c15822_24204224	2A	100.48
AX-94472219	2A	100.98
AX-94567538	2A	100.98
wsnp_CAP11_rep_c8768_3788007	2A	100.98
wsnp_CAP12_c901_472535	2A	100.98
AX-94410389	2A	101.48
Excalibur_c11947_746	2A	101.48
Kukri_c15308_173	2A	101.48
RAC875_rep_c70093_1079	2A	101.48
AX-94639168	2A	101.48
AX-94631230	2A	101.48
BS00062843_51	2A	101.48
wsnp_Ex_rep_c101526_86881496	2A	101.48
Excalibur_rep_c107523_281	2A	101.48
BobWhite_c5096_156	2A	101.99
wsnp_Ex_c22862_32074455	2A	102.49
AX-94692672	2A	102.99
Kukri_rep_c112814_587	2A	103.49
wsnp_BG263521A_Ta_2_2	2A	103.49
AX-94705914	2A	104
BobWhite_rep_c64680_305	2A	105.52
AX-94636903	2A	105.52
BS00090940_51	2A	105.52
AX-95120495	2A	105.52
Excalibur_c74304_642	2A	106.02
Ex_c4847_236	2A	106.02
GENE.1075_265	2A	106.02
TA013564.0487	2A	106.02
Excalibur_c50934_159	2A	106.52
BS00107555_51	2A	106.52
wsnp_Ex_c41913_48628389	2A	107.03
RAC875_c25986_82	2A	107.03
wsnp_Ex_c20370_29434410	2A	107.03
IAAV2376	2A	107.03
Tdurum_contig44062_733	2A	107.53
Tdurum_contig15512_429	2A	108.03
wsnp_Ex_c36242_44232305	2A	108.53
GENE.4359_59	2A	109.04
RAC875_c17628_867	2A	109.04
TA004478.0271	2A	109.04
Excalibur_c28938_185	2A	109.04
Tdurum_contig45580_1717	2A	109.54
AX-94729084	2A	109.54
AX-95164703	2A	110.04
Kukri_c40035_258	2A	112.61
RAC875_rep_c119471_174	2A	115.17
Tdurum_contig27887_55	2A	115.17
GENE.1028_694	2A	116.69
BS00089457_51	2A	116.69
AX-94438643	2A	116.69
RAC875_c69068_71	2A	118.22
AX-94459200	2A	120.26
AX-94503133	2A	121.78
AX-94388414	2A	123.82
BS00062756_51	2A	124.32
AX-95180124	2A	124.83
AX-94665408	2A	125.33
BS00055514_51	2A	125.83
AX-95072131	2A	126.33
Excalibur_c5346_2716	2A	126.33
wsnp_BE406351A_Ta_2_2	2A	126.84
wsnp_BE403597A_Ta_2_1	2A	126.84
RAC875_c39665_175	2A	127.34
wsnp_BE406351A_Ta_2_3	2A	127.84
BS00040336_51	2A	127.84
BS00067806_51	2A	127.84
BS00040337_51	2A	127.84
AX-95196147	2A	129.36
AX-94402263	2A	129.36
RAC875_c18698_550	2A	129.36
AX-95095516	2A	130.37
Kukri_c11327_977	2A	130.88
AX-95256011	2A	131.38
AX-94436530	2A	131.88
BS00032606_51	2A	131.88
AX-95661975	2A	134.98
AX-95216527	2A	134.98
Ku_c3202_1646	2A	134.98
BS00090569_51	2A	136.5
GENE.1792_560	2A	139.59
Excalibur_rep_c69799_1999	2A	139.59
BS00022377_51	2A	140.1
BS00110587_51	2A	140.1
BS00039406_51	2A	140.1
RAC875_rep_c69987_930	2A	140.1
RFL_Contig3780_644	2A	140.1
RAC875_c35521_185	2A	140.1
wsnp_JD_c514_781859	2A	140.1
AX-94860603	2A	142.14
AX-94508462	2A	143.15
RAC875_c38018_278	2A	144.67
wsnp_CAP8_c2677_1394934	2A	146.19
Excalibur_c28017_641	2A	146.19
Tdurum_contig33398_106	2A	149.29
BS00080752_51	2A	149.29
BS00029332_51	2A	154
AX-95240055	2A	155.52
AX-94696711	2A	158.09
BS00083497_51	2A	158.09
Kukri_c40121_373	2A	158.09
AX-95173053	2A	159.61
BS00096882_51	2A	161.14
wsnp_Ku_c54793_58953037	2A	161.64
Excalibur_c7282_285	2A	161.64
TG0103	2A	161.64
AX-94858130	2A	161.64
IAAV6408	2A	162.65
BS00086329_51	2A	163.15
Excalibur_c47219_186	2A	163.65
RAC875_c17696_225	2A	163.65
CAP12_c2521_103	2A	163.65
AX-94833084	2A	163.65
AX-94669780	2A	163.65
Kukri_c74165_204	2A	165.18
BS00081506_51	2A	166.19
AX-94732891	2A	167.71
AX-95100323	2A	169.23
AX-94514221	2A	169.73
BS00093201_51	2A	170.24
AX-94982819	2A	170.74
BS00080751_51	2A	171.24
AX-94895021	2A	173.81
Jagger_c4026_328	2A	173.81
wsnp_BE445431A_Td_2_1	2A	174.82
Jagger_c9554_114	2A	175.83
AX-94417710	2A	176.33
wsnp_Ra_c32271_41304469	2A	176.83
AX-94579959	2A	177.33
AX-94874921	2A	178.34
wsnp_JD_c15127_14676522	2A	179.87
BS00107804_51	2A	181.91
Excalibur_rep_c102052_721	2A	182.41
IAAV1698	2A	182.41
BS00035883_51	2A	182.41
BS00089497_51	2A	182.41
RAC875_rep_c73777_485	2A	182.41
BS00039422_51	2A	182.41
BS00010696_51	2A	183.93
AX-94525393	2A	185.46
AX-94653560	2A	185.96
Excalibur_c6660_746	2A	185.96
wsnp_Ku_c8927_15048149	2A	185.96
GENE.1381_132	2A	186.46
Ku_c8927_2075	2A	186.96
Kukri_c62142_683	2A	186.96
Kukri_c29170_680	2A	187.47
GENE.1381_110	2A	187.97
AX-94786451	2A	187.97
wsnp_be471201A_Ta_1_1	2A	187.97
AX-94825088	2A	189.49
BobWhite_c3833_815	2A	190
AX-94471569	2A	190
RAC875_c21906_247	2A	190
wsnp_Ex_c10084_16572374	2A	190
BobWhite_c17403_635	2A	190
AX-94903329	2A	195.26
AX-94602066	2A	196.79
BS00011478_51	2A	196.79
AX-94392626	2A	197.29
AX-95102130	2A	198.81
RAC875_rep_c69619_145	2A	203.53
wsnp_JD_c2578_3489735	2A	204.54
AX-94430599	2A	205.04
Ku_c33884_267	2A	206.56
BS00024921_51	2A	209.66
AX-95093101	2A	212.75
AX-95214448	2A	215.31
BS00065366_51	2A	215.31
AX-94674675	2A	215.82
AX-94585454	2A	223.94
AX-94705447	2A	223.94
AX-94538070	2A	224.45
IACX5800	2A	224.45
AX-94910420	2A	225.97
BS00110128_51	2A	226.47
AX-94893321	2A	226.47
wsnp_Ex_rep_c70299_69243401	2A	226.97
wsnp_Ex_c5740_10081171	2A	227.48
Ex_c5740_1133	2A	227.48
RAC875_c33037_578	2A	227.48
AX-94516815	2A	230.57
IAAV2861	2A	234.2
Tdurum_contig82404_354	2A	234.7
Ra_c3750_1082	2A	236.22
tplb0060h04_139	2A	237.75
Excalibur_c42110_66	2A	238.76
Tdurum_contig31185_456	2A	239.26
BobWhite_c15773_166	2A	243.43
Excalibur_c72359_56	2A	243.93
BobWhite_c5178_188	2A	244.43
AX-94611746	2A	247
Tdurum_contig86243_288	2A	252.83
AX-94810461	2A	253.84
AX-94517837	2A	253.84
AX-94908718	2A	254.34
AX-94856412	2A	254.34
RAC875_c9523_328	2A	254.34
AX-94422071	2A	254.34
Tdurum_contig63071_67	2A	254.84
Kukri_rep_c68300_216	2A	256.88
Tdurum_contig6086_269	2A	256.88
AX-95178160	2A	257.38
BS00022409_51	2A	257.38
AX-94620950	2A	257.38
Excalibur_c8009_325	2A	257.89
Tdurum_contig86183_221	2A	258.39
IACX3245	2A	259.4
BS00000250_51	2A	259.4
BS00096927_51	2A	261.44
Excalibur_c52319_257	2A	262.45
Excalibur_c4372_363	2A	262.95
wsnp_Ex_c14639_22695091	2A	263.96
wsnp_Ra_c6586_11477949	2A	263.96
Tdurum_contig61938_424	2A	263.96
wsnp_Ex_c2137_4014287	2A	263.96
Excalibur_c44834_80	2A	263.96
BobWhite_c42181_327	2A	263.96
CAP12_c575_105	2A	263.96
BS00074648_51	2A	266.53
wsnp_Ex_c2137_4014383	2A	269.09
AX-95009146	2A	271.13
BS00011539_51	2A	271.64
AX-94618441	2A	271.64
Tdurum_contig8350_350	2A	274.73
Tdurum_contig56321_232	2A	276.25
AX-95080933	2A	277.78
RAC875_c96033_191	2A	280.34
RAC875_c27530_860	2A	282.9
IAAV880	2A	282.9
RAC875_c1043_258	2A	282.9
RAC875_c96399_610	2A	282.9
wsnp_Ex_c3695_6740339	2A	283.41
RAC875_c22328_1356	2A	283.41
RAC875_c22328_490	2A	283.41
AX-94811175	2A	283.41
Excalibur_rep_c69149_1588	2A	283.41
Tdurum_contig8350_243	2A	283.41
CAP8_c3129_381	2A	283.41
RAC875_c35688_382	2A	283.41
Excalibur_c62106_387	2A	283.41
AX-95192643	2A	283.41
AX-94598441	2A	283.41
BS00064813_51	2A	283.91
AX-94662317	2A	283.91
tplb0025l18_1788	2A	283.91
Tdurum_contig10048_207	2A	283.91
BS00098033_51	2A	284.41
wsnp_Ku_c26323_36285601	2A	285.94
AX-94383052	2A	287.98
Kukri_c7605_181	2A	287.98
AX-94602542	2A	287.98
AX-94590094	2A	288.48
wsnp_Ex_rep_c108004_91402649	2A	288.48
RFL_Contig5277_1141	2A	288.98
BS00091763_51	2A	289.48
Excalibur_c24959_182	2A	289.48
wsnp_JD_c289_450995	2A	289.48
RAC875_c1757_530	2A	289.48
IAAV5706	2A	289.99
AX-94600421	2A	289.99
TA001453.0801	2A	289.99
RFL_Contig2972_2819	2A	289.99
AX-94837335	2A	289.99
RFL_Contig2972_2285	2A	289.99
RAC875_c24364_307	2A	289.99
AX-94920711	2A	289.99
AX-94492833	2A	289.99
AX-95217784	2A	289.99
Kukri_c52608_142	2A	289.99
BS00060596_51	2A	289.99
wsnp_Ex_c63909_62932893	2A	289.99
wsnp_JD_c30_49073	2A	289.99
wsnp_Ex_c63909_62932669	2A	289.99
AX-95235371	2A	289.99
BS00094172_51	2A	289.99
wsnp_JD_c30_49876	2A	289.99
AX-94444084	2A	289.99
wsnp_JD_c16948_15934352	2A	289.99
IACX8446	2B	0
wsnp_JD_c640_960796	2B	0
Kukri_c30847_551	2B	0
wsnp_Ex_c7776_13247365	2B	0
AX-94505732	2B	0
RAC875_rep_c109471_154	2B	3.62
RAC875_rep_c115433_378	2B	4.13
Ra_c11464_294	2B	4.13
wsnp_Ra_c1660_3275687	2B	4.13
BS00044332_51	2B	4.13
wsnp_Ex_c326_636368	2B	4.13
Ra_c491_902	2B	4.13
AX-94571927	2B	4.13
BS00084668_51	2B	4.13
BobWhite_c12144_216	2B	7.22
Tdurum_contig10208_447	2B	7.22
AX-94903439	2B	7.72
AX-95146929	2B	8.22
BS00067280_51	2B	8.73
BobWhite_c17047_268	2B	11.82
Kukri_c3701_392	2B	14.91
TA007378.0375	2B	15.42
Kukri_c7339_113	2B	16.43
BobWhite_c11397_231	2B	19.52
AX-95237487	2B	20.02
tplb0054d13_2445	2B	20.53
Excalibur_c2656_3198	2B	20.53
AX-94831339	2B	21.54
tplb0034e07_1869	2B	22.55
AX-94716447	2B	22.55
AX-94972565	2B	22.55
BS00058815_51	2B	22.55
GENE.1230_189	2B	23.56
RAC875_c34512_685	2B	24.06
RAC875_rep_c71112_400	2B	24.56
RAC875_rep_c112807_403	2B	24.56
RAC875_c27611_467	2B	24.56
Excalibur_c29417_400	2B	25.57
AX-94526671	2B	26.07
Excalibur_rep_c107769_116	2B	26.07
RAC875_c34512_493	2B	26.58
AX-94391038	2B	29.67
AX-94960795	2B	29.67
BobWhite_c1149_539	2B	31.97
BobWhite_c19945_341	2B	31.97
RAC875_c6538_123	2B	31.97
BS00081871_51	2B	32.73
tplb0058m16_1152	2B	33.74
RAC875_c609_362	2B	34.24
Excalibur_c841_609	2B	34.24
AX-94800378	2B	34.24
Excalibur_c41459_96	2B	34.24
Kukri_c16758_443	2B	34.24
Excalibur_c4748_360	2B	34.24
GENE.1018_99	2B	34.24
RAC875_c2300_1021	2B	34.24
Excalibur_rep_c112367_293	2B	40.07
RAC875_c5577_1682	2B	40.07
RAC875_c63883_76	2B	44.24
Excalibur_rep_c101263_892	2B	44.24
wsnp_Ku_c2486_4751695	2B	47.87
RAC875_rep_c106596_127	2B	48.37
RFL_Contig1863_250	2B	48.37
AX-94462571	2B	49.38
Ex_c14755_1362	2B	60.54
wsnp_Ra_c19083_28215239	2B	60.54
BobWhite_c2988_493	2B	60.54
RFL_Contig5031_526	2B	63.1
Tdurum_contig54634_815	2B	63.1
Kukri_c53810_137	2B	63.1
Tdurum_contig28712_225	2B	66.73
TA001874.1495	2B	71.44
RAC875_c21868_792	2B	81.37
Kukri_rep_c106290_204	2B	81.37
Kukri_c28478_750	2B	81.37
Ku_c41677_924	2B	81.37
Excalibur_c21220_88	2B	81.87
wsnp_Ex_c1962_3696265	2B	82.88
wsnp_Ex_rep_c72511_70872203	2B	83.89
AX-94732155	2B	84.9
BS00077914_51	2B	85.4
RAC875_c31358_214	2B	85.9
BobWhite_c5072_107	2B	85.9
BS00022950_51	2B	85.9
BobWhite_rep_c65082_84	2B	85.9
wsnp_JD_c42879_30043973	2B	85.9
BobWhite_rep_c63363_160	2B	85.9
wsnp_Ex_c163_321026	2B	85.9
Kukri_rep_c103893_875	2B	85.9
TA005292.0114	2B	91.73
wsnp_Ra_c407_862316	2B	91.73
TG0051	2B	93.77
Kukri_c26288_419	2B	93.77
BobWhite_c41535_52	2B	96.87
Kukri_c5497_312	2B	96.87
AX-94561290	2B	98.39
RAC875_c34516_316	2B	98.39
BobWhite_c47608_273	2B	98.39
Tdurum_contig45255_3473	2B	100.43
Excalibur_c21752_768	2B	100.43
Kukri_c12368_82	2B	100.43
BS00065105_51	2B	100.93
RAC875_c22429_249	2B	101.44
AX-94948233	2B	101.94
RAC875_rep_c109207_706	2B	105.57
BobWhite_c31129_60	2B	106.07
IACX1098	2B	108.63
Tdurum_contig42636_995	2B	113.35
AX-95140591	2B	114.36
Ku_c5725_892	2B	115.37
Kukri_rep_c107572_121	2B	115.87
wsnp_Ku_c31_62657	2B	117.39
wsnp_JD_c3732_4781170	2B	117.39
BS00010055_51	2B	118.4
AX-94886530	2B	121.5
TA006136.0595	2B	122
RAC875_rep_c99492_65	2B	122.5
AX-95108394	2B	123.01
BS00000405_51	2B	123.01
AX-94430027	2B	123.51
AX-95194597	2B	124.01
GENE.1741_103	2B	124.51
Kukri_c36879_83	2B	125.02
Kukri_c62277_80	2B	125.52
AX-95231094	2B	125.52
RAC875_c86069_65	2B	126.02
Excalibur_c12135_100	2B	126.52
AX-94633439	2B	126.52
TA002196.1336	2B	127.03
IAAV1101	2B	127.03
BS00110319_51	2B	127.03
BS00110442_51	2B	127.03
RFL_Contig1385_326	2B	127.53
wsnp_Ex_c269_518324	2B	132.24
wsnp_BE497494B_Ta_2_1	2B	132.24
Ra_c27275_627	2B	132.24
BobWhite_c10238_127	2B	132.24
BS00063577_51	2B	132.75
RAC875_c31252_173	2B	133.25
wsnp_Ku_c11665_18999583	2B	133.25
BS00066905_51	2B	133.25
RAC875_c52566_551	2B	133.75
RAC875_c52566_644	2B	133.75
IAAV539	2B	134.25
IAAV7129	2B	134.25
JD_c39990_130	2B	134.76
Tdurum_contig83066_276	2B	134.76
RFL_Contig1633_304	2B	136.8
RAC875_c14105_66	2B	137.3
BS00022657_51	2B	137.8
RAC875_c15649_1101	2B	137.8
Excalibur_c13239_85	2B	137.8
tplb0045o20_699	2B	144.77
wsnp_Ex_c7246_12443506	2B	151.16
Excalibur_c40056_59	2B	155.33
AX-95189509	2B	156.85
wsnp_Ex_c45094_50985067	2B	157.86
AX-95247247	2B	157.86
RAC875_c32503_134	2B	157.86
wsnp_Ex_c62844_62315607	2B	157.86
AX-95007105	2B	157.86
wsnp_JD_rep_c64505_41132927	2B	158.36
Kukri_rep_c94009_116	2B	160.93
BS00043103_51	2B	160.93
wsnp_JD_c6350_7516597	2B	160.93
AX-94402375	2B	160.93
Excalibur_c15031_73	2B	160.93
RAC875_rep_c106400_276	2B	160.93
RAC875_c1226_652	2B	163.49
wsnp_RFL_Contig3802_4108582	2B	167.12
RAC875_c57938_94	2B	167.12
Excalibur_c65830_82	2B	167.12
BS00034245_51	2B	168.64
Ra_c6700_406	2B	168.64
wsnp_Ku_c2725_5163091	2B	170.17
IAAV6765	2B	171.69
Kukri_rep_c107245_634	2B	172.19
wsnp_Ex_c15089_23270614	2B	172.69
wsnp_Ex_rep_c102216_87433489	2B	174.22
AX-94472212	2B	174.72
Excalibur_rep_c107558_367	2B	175.22
wsnp_Ex_c3764_6853627	2B	175.72
wsnp_Ra_c46023_52004149	2B	176.23
Kukri_c48787_108	2B	177.75
RAC875_c5080_915	2B	178.76
Kukri_rep_c69267_496	2B	178.76
Ku_c6546_718	2B	179.26
wsnp_Ex_c7003_12065567	2B	179.77
RAC875_c46661_184	2B	179.77
BobWhite_c8113_532	2B	179.77
wsnp_Ex_c51352_55323092	2B	180.27
wsnp_Ex_rep_c67671_66332423	2B	180.27
BobWhite_c10215_242	2B	181.28
Ra_c6266_136	2B	181.28
Tdurum_contig91519_224	2B	181.78
BobWhite_c16735_131	2B	182.28
AX-94693685	2B	183.81
Jagger_c6853_60	2B	184.82
AX-94393508	2B	185.32
Tdurum_contig26542_457	2B	186.84
Tdurum_contig92604_368	2B	187.85
wsnp_Ex_c20169_29215401	2B	188.35
RFL_Contig4718_1269	2B	188.35
AX-94507617	2B	188.86
Ra_c111671_555	2B	188.86
Kukri_s115194_71	2B	190.9
Excalibur_rep_c66577_159	2B	191.4
Excalibur_c6922_1393	2B	191.4
AX-94391786	2B	191.4
wsnp_Ex_rep_c67543_66165372	2B	193.97
AX-94401657	2B	194.47
AX-94452709	2B	194.47
AX-94715499	2B	194.47
wsnp_Ex_c114_229879	2B	194.97
wsnp_Ex_c17845_26604587	2B	195.98
wsnp_Ex_c55735_58127324	2B	196.48
Ex_c55735_1012	2B	196.48
AX-94388449	2B	197.49
AX-94516033	2B	197.49
IAAV5675	2B	200.06
Ex_c24711_1153	2B	200.06
Tdurum_contig31911_195	2B	200.06
Ra_c4051_1010	2B	200.06
Ra_c68109_376	2B	200.56
Excalibur_c11392_1193	2B	201.06
AX-94922346	2B	203.1
Ra_c71978_532	2B	205.15
AX-94522698	2B	207.19
IAAV5350	2B	209.75
RFL_Contig4856_71	2B	209.75
wsnp_Ex_c7203_12370983	2B	209.75
IAAV717	2B	209.75
BS00093993_51	2B	210.25
Tdurum_contig54925_202	2B	211.26
Kukri_c40621_513	2B	211.26
BS00093992_51	2B	212.27
Tdurum_contig82770_296	2B	213.28
BS00069685_51	2B	213.28
AX-94986215	2B	213.79
Tdurum_contig7144_602	2B	213.79
AX-95073999	2B	214.29
BS00012071_51	2B	214.79
AX-94415212	2B	216.83
wsnp_Ku_c12037_19549078	2B	219.4
AX-95148316	2B	221.96
Kukri_c84629_315	2B	222.46
Excalibur_c65341_303	2B	222.46
CAP12_c2472_60	2B	225.56
RFL_Contig3172_1752	2B	228.65
AX-95154357	2B	228.65
AX-94801818	2B	228.65
BS00046165_51	2B	228.65
RAC875_c10132_462	2B	229.15
BS00092031_51	2B	230.68
Excalibur_c80601_278	2B	232.2
BobWhite_c38001_528	2B	232.2
BS00094330_51	2B	233.72
Excalibur_c80601_308	2B	235.25
Kukri_c57014_168	2B	236.77
Ku_c3479_1035	2B	236.77
Excalibur_c37753_655	2B	237.27
wsnp_RFL_Contig3917_4326857	2B	237.27
wsnp_Ex_c4024_7278036	2B	237.77
Excalibur_c2157_173	2B	238.28
BS00077131_51	2B	238.28
AX-94576974	2B	238.78
Kukri_c7953_513	2B	239.28
BS00022717_51	2B	239.78
AX-94801270	2B	239.78
Tdurum_contig32221_462	2B	240.29
CAP7_c1933_170	2B	240.79
BS00110588_51	2B	241.29
Tdurum_contig18858_324	2B	241.79
AX-94648660	2B	241.79
Tdurum_contig5691_596	2B	241.79
Excalibur_c60964_203	2B	242.3
BS00063365_51	2B	242.3
BS00039686_51	2B	242.3
BobWhite_rep_c64679_73	2B	242.8
RAC875_c14885_1184	2B	243.3
AX-94547426	2B	243.3
BS00047070_51	2B	243.3
BS00111236_51	2B	246.4
Excalibur_c80601_83	2B	249.49
IAAV3100	2B	249.49
BobWhite_c32938_177	2B	249.49
Excalibur_c1353_1364	2B	251.01
AX-94787485	2B	252.02
Excalibur_c105074_293	2B	253.55
Excalibur_c2484_2113	2B	254.56
RAC875_c4465_549	2B	255.06
Kukri_c834_259	2B	255.06
RAC875_c4465_81	2B	255.06
RFL_Contig2577_584	2B	255.06
Excalibur_c2819_2310	2B	255.06
wsnp_Ex_c2203_4129271	2B	255.06
wsnp_Ex_rep_c67838_66536117	2B	258.15
Tdurum_contig28795_273	2B	258.65
BobWhite_c10539_201	2B	259.16
RAC875_c20979_234	2B	260.17
IAAV1776	2B	260.67
wsnp_RFL_Contig3273_3319580	2B	261.17
wsnp_Ex_c25943_35203857	2B	261.67
BS00010988_51	2B	262.68
Excalibur_c18966_804	2B	262.68
AX-95085281	2B	263.69
Kukri_c44368_240	2B	264.2
BS00070104_51	2B	264.7
AX-94945263	2B	265.2
IAAV283	2B	265.7
RAC875_c65882_668	2B	272.96
AX-95241215	2B	273.97
Kukri_c12117_134	2B	273.97
RAC875_c30797_179	2B	274.47
BobWhite_rep_c64068_241	2B	274.47
GENE.1355_130	2B	275.48
RAC875_c57353_245	2B	275.98
Excalibur_c224_1383	2B	275.98
BS00084417_51	2B	275.98
BS00011047_51	2B	275.98
Kukri_c18754_67	2B	275.98
Kukri_c34553_89	2B	275.98
Jagger_c7688_98	2B	275.98
Kukri_c27631_1329	2B	276.48
AX-94961810	2B	276.99
Kukri_c55996_63	2B	276.99
RFL_Contig3713_316	2B	277.49
Excalibur_c7051_1027	2B	277.49
RAC875_c5673_1209	2B	277.49
RFL_Contig385_761	2B	277.49
RAC875_c98387_130	2B	277.49
BS00009882_51	2B	277.49
Excalibur_c1883_340	2B	277.49
Kukri_c55909_1109	2B	277.49
BS00011276_51	2B	277.49
RAC875_c1858_2693	2B	277.49
AX-94522134	2B	277.99
IAAV1502	2B	278.49
RAC875_c31328_381	2B	279
Tdurum_contig12159_468	2B	279
IACX8828	2B	279
RAC875_c22463_494	2B	279.5
RAC875_c37540_583	2B	280
BS00069756_51	2B	280
CAP12_s9114_61	2B	280.5
BS00046601_51	2B	280.5
BobWhite_c33464_133	2B	280.5
BobWhite_c5191_563	2B	280.5
TA004710.0394	2B	281.01
BS00106695_51	2B	281.01
BobWhite_c5191_362	2B	281.51
RFL_Contig2751_1562	2B	281.51
Ex_c52711_584	2B	283.03
AX-94872426	2B	284.04
AX-94702510	2B	289.87
IACX11305	2B	290.37
Tdurum_contig14482_1013	2B	290.37
Tdurum_contig14482_423	2B	290.37
Excalibur_rep_c109577_698	2B	290.87
Excalibur_c7971_1573	2B	290.87
BobWhite_c10520_1517	2B	296.7
AX-95116218	2B	296.7
Excalibur_c5438_274	2B	296.7
wsnp_CAP11_c3226_1588070	2B	299.79
BS00031098_51	2B	300.3
BS00039187_51	2B	301.31
IACX8602	2B	301.81
BS00067878_51	2B	301.81
wsnp_Ex_c19094_28015035	2B	303.33
BS00004413_51	2B	308.6
AX-94491106	2B	308.6
TA002989.0535	2B	309.61
AX-94547064	2B	309.61
tplb0030f06_593	2B	310.11
wsnp_Ex_rep_c103381_88353000	2B	310.62
GENE.0918_159	2B	310.62
CAP11_c1820_244	2B	311.12
BS00072840_51	2B	314.75
Kukri_c17_1246	2B	316.79
AX-94433535	2B	319.35
tplb0042a21_1091	2B	319.35
tplb0042o21_419	2B	319.86
BobWhite_c2822_228	2B	320.36
Kukri_c900_1334	2B	321.37
Kukri_c94792_127	2B	321.37
AX-94408875	2B	323.41
BS00097147_51	2B	328.68
Excalibur_c94383_157	2B	330.72
Excalibur_c33525_279	2B	332.24
wsnp_Ex_c12675_20144479	2B	332.74
wsnp_Ra_c58860_60407020	2B	332.74
BS00083998_51	2B	333.25
AX-95087229	2B	333.75
AX-95087261	2B	334.25
AX-94575146	2B	334.75
BobWhite_c12911_788	2B	340.58
IAAV1798	2B	344.75
RFL_Contig5495_563	2B	345.25
AX-95173582	2B	345.25
Jagger_c10188_98	2B	345.25
AX-94905821	2B	345.75
RAC875_c16993_196	2B	346.26
BS00032490_51	2B	349.35
AX-94869203	2B	350.87
AX-94415912	2B	352.4
Excalibur_c12675_1147	2B	352.9
AX-94397476	2B	352.9
Excalibur_c48871_625	2B	352.9
RAC875_c75800_216	2B	352.9
AX-94386402	2B	355.46
wsnp_Ex_rep_c70525_69448648	2B	358.03
Kukri_c9898_1766	2B	358.03
Kukri_c49784_86	2B	358.03
Excalibur_rep_c106698_235	2B	358.03
Ra_c105904_187	2B	358.03
Ra_c105904_1191	2B	358.03
Excalibur_c8919_345	2B	358.03
Excalibur_c47996_509	2B	358.03
AX-94890379	2B	358.53
Kukri_c36139_292	2D	0
TA001604.0648	2D	0
AX-94783770	2D	0.5
AX-94391187	2D	1
AX-95224063	2D	1
BS00095512_51	2D	1
wsnp_Ex_c12250_19568265	2D	1.5
TA020776.0309	2D	2.01
BS00065034_51	2D	2.01
AX-94761296	2D	3.53
BobWhite_c5466_1015	2D	7.7
RAC875_c22368_641	2D	8.2
D_F1BEJMU02GB94Z_188	2D	8.2
TA006853.0521	2D	8.2
Kukri_c19434_936	2D	9.21
wsnp_Ex_c58019_59494143	2D	9.71
TA006853.0531	2D	10.21
wsnp_CAP7_c888_455397	2D	10.72
D_F1BEJMU01A0OMY_356	2D	11.22
wsnp_Ex_c7669_13090850	2D	11.22
wsnp_Ra_c25656_35227058	2D	11.72
BS00049514_51	2D	12.22
BS00071755_51	2D	13.75
BS00067698_51	2D	14.25
AX-94722807	2D	19.52
TA022134.0255	2D	19.52
Excalibur_rep_c109101_94	2D	19.52
TA010191.1338	2D	19.52
Kukri_c30439_2407	2D	19.52
AX-94384624	2D	20.02
AX-94939601	2D	20.02
BS00023099_51	2D	20.52
RAC875_c48703_189	2D	24.15
RAC875_c52926_871	2D	24.65
BS00047901_51	2D	25.16
BS00022234_51	2D	27.2
Tdurum_contig42423_1963	2D	39.62
AX-95072534	2D	39.62
BS00022276_51	2D	50.16
AX-94627716	2D	51.68
Kukri_c27309_590	2D	51.68
wsnp_CAP12_c1503_764765	2D	51.68
AX-95110141	2D	51.68
D_contig73920_552	2D	64.1
BobWhite_c16655_421	2D	64.61
wsnp_Ku_c12022_19520410	2D	65.11
AX-94459264	2D	65.11
wsnp_Ku_c7229_12491877	2D	65.61
Kukri_c16477_181	2D	66.11
RAC875_c13116_1162	2D	70.83
BobWhite_rep_c51612_864	2D	70.83
RAC875_c31560_141	2D	70.83
AX-94499721	2D	71.33
RAC875_c45702_412	2D	71.83
RAC875_rep_c108908_72	2D	71.83
BS00039211_51	2D	72.34
BS00039210_51	2D	72.34
BS00063517_51	2D	72.34
wsnp_Ex_c6400_11123059	2D	79.3
AX-94582505	2D	81.34
BobWhite_c6055_185	2D	81.84
Excalibur_c22877_1990	2D	81.84
BS00010131_51	2D	81.84
AX-94765106	2D	82.35
Kukri_rep_c71152_906	2D	82.85
Kukri_c60627_74	2D	83.35
RAC875_rep_c114236_188	2D	83.35
AX-95081347	2D	83.35
IAAV4282	2D	86.44
BS00083504_51	2D	86.95
BS00021718_51	2D	87.45
BS00065946_51	2D	87.95
AX-94960755	2D	87.95
wsnp_BE444144D_Ta_1_1	2D	87.95
BS00080239_51	2D	87.95
TA001366.0072	2D	88.45
IACX5670	2D	88.96
Kukri_c49670_857	2D	89.46
RFL_Contig5917_2433	2D	89.96
AX-94479119	2D	90.97
Kukri_rep_c103845_165	2D	93.01
BS00046890_51	2D	93.01
BS00063225_51	2D	93.01
IAAV6312	2D	93.01
RAC875_c60563_531	2D	93.01
BS00067584_51	2D	93.52
AX-94431423	2D	93.52
BS00079440_51	2D	93.52
RAC875_rep_c73201_205	2D	94.02
Kukri_c26576_329	2D	94.02
AX-95228764	2D	94.52
RAC875_c38724_323	2D	94.52
Kukri_c14902_1112	2D	100.91
AX-94989875	2D	102.44
GENE.0875_620	2D	102.44
Kukri_rep_c69087_153	2D	102.94
TA009010.0422	2D	105.5
D_GA8KES401AVZF3_380	2D	108.07
AX-94860457	2D	108.57
GENE.0687_448	2D	108.57
Kukri_c5579_466	2D	108.57
wsnp_Ex_rep_c68555_67394261	2D	108.57
TA003872.0714	2D	108.57
AX-94460734	2D	108.57
AX-94448732	2D	109.58
wsnp_Ex_rep_c66522_64795143	2D	131.89
AX-94401150	2D	131.89
RAC875_c12803_1620	2D	134.99
AX-95004834	2D	134.99
AX-95006148	2D	134.99
AX-94971252	2D	135.49
Ku_c19185_1569	2D	143.62
GENE.0686_804	2D	160.04
RAC875_c50347_258	2D	160.04
RAC875_c15518_236	2D	160.04
AX-94734962	2D	161.56
TA003390.0807	2D	161.56
BS00009458_51	2D	161.56
TA017943.0495	2D	161.56
AX-95168570	2D	163.61
BS00086534_51	2D	166.17
Excalibur_c42413_442	2D	166.67
AX-95142632	2D	166.67
AX-94561715	3A	0
TA003589.0518	3A	0.5
AX-95157724	3A	0.5
AX-94969670	3A	0.5
RAC875_c36922_829	3A	1.51
Kukri_rep_c89183_282	3A	1.51
Excalibur_c1529_1644	3A	1.51
AX-94743968	3A	2.01
wsnp_Ex_rep_c67635_66292308	3A	2.01
BS00066230_51	3A	2.01
TA002103.1262	3A	9.55
AX-94764538	3A	15.38
RAC875_c67770_822	3A	15.38
Excalibur_c19658_82	3A	16.39
BS00055211_51	3A	18.43
AX-94498487	3A	18.93
AX-94461370	3A	20.97
BS00079521_51	3A	21.48
RAC875_c7060_67	3A	21.98
AX-95023272	3A	21.98
Excalibur_c62042_175	3A	21.98
RAC875_c82493_67	3A	21.98
Excalibur_c10383_432	3A	21.98
Kukri_c4030_896	3A	22.48
IAAV1155	3A	22.98
Kukri_s117068_130	3A	22.98
AX-94382416	3A	22.98
Kukri_rep_c96809_352	3A	22.98
Kukri_s117068_198	3A	22.98
RAC875_c76367_523	3A	22.98
BS00022798_51	3A	22.98
BS00093975_51	3A	22.98
wsnp_Ra_rep_c106523_90273922	3A	26.08
wsnp_CAP11_rep_c4157_1965583	3A	26.58
BS00057445_51	3A	35.9
AX-94421535	3A	36.15
BS00049032_51	3A	36.15
wsnp_Ex_c8240_13914674	3A	36.15
AX-94394356	3A	36.15
AX-95109402	3A	36.15
RFL_Contig1896_1236	3A	38.71
AX-94449625	3A	38.71
AX-94769054	3A	38.71
BS00094366_51	3A	42.88
RAC875_c2464_274	3A	42.88
AX-95237322	3A	43.38
BS00032524_51	3A	43.89
BS00007502_51	3A	44.39
RAC875_c46323_1996	3A	46.43
AX-94684189	3A	46.43
Excalibur_c25239_283	3A	48.47
BS00048757_51	3A	48.47
BS00065956_51	3A	48.47
GENE.1674_631	3A	55.43
Kukri_c34845_242	3A	55.43
RAC875_c45016_79	3A	55.94
BobWhite_c9704_273	3A	56.95
JG_c3077_225	3A	56.95
Excalibur_c16197_748	3A	57.96
Excalibur_rep_c102974_175	3A	61.05
BS00034334_51	3A	61.05
AX-95116004	3A	61.55
Excalibur_s113043_59	3A	62.05
wsnp_Ra_c16278_24893033	3A	62.56
AX-94389504	3A	62.56
Kukri_rep_c102953_304	3A	62.56
Excalibur_c2578_1966	3A	62.56
AX-94443246	3A	62.56
wsnp_Ku_c40218_48484410	3A	62.56
IAAV9068	3A	63.06
wsnp_BF292295A_Ta_2_1	3A	63.06
AX-94531680	3A	64.07
Tdurum_contig62502_90	3A	67.16
AX-95084434	3A	67.16
wsnp_Ex_c13949_21828493	3A	78.32
wsnp_Ex_c11877_19055556	3A	79.84
AX-94495697	3A	80.85
wsnp_Ku_c11052_18135847	3A	86.68
BS00066475_51	3A	89.77
wsnp_Ex_rep_c102478_87635370	3A	92.87
AX-95247676	3A	92.87
AX-94442342	3A	95.43
BS00110129_51	3A	95.43
BS00021976_51	3A	95.94
AX-94475547	3A	95.94
Excalibur_rep_c103091_266	3A	96.95
AX-94580039	3A	97.96
wsnp_JD_rep_c64325_41024646	3A	103.78
wsnp_CAP11_c2438_1258747	3A	104.28
BobWhite_c43213_184	3A	105.29
BS00062645_51	3A	105.29
Kukri_c54729_181	3A	105.29
BS00010204_51	3A	105.29
wsnp_Ex_c1141_2191485	3A	108.92
IAAV4781	3A	109.43
wsnp_Ex_rep_c67727_66398596	3A	109.43
Excalibur_rep_c116073_259	3A	109.43
IAAV6974	3A	109.43
wsnp_JG_c2509_1153697	3A	109.93
AX-95008615	3A	109.93
wsnp_Ku_c44089_51445136	3A	110.43
wsnp_RFL_Contig3866_4228783	3A	110.43
Ku_c17569_905	3A	114.06
AX-94770934	3A	114.06
BS00010531_51	3A	114.06
wsnp_Ex_c53364_56625806	3A	114.06
wsnp_Ra_c44141_50623811	3A	114.06
AX-94520713	3A	114.06
AX-94430923	3A	114.06
AX-94458766	3A	114.06
JD_c1187_1398	3A	114.06
RAC875_rep_c104403_524	3A	114.06
AX-94606333	3A	114.06
wsnp_JD_c5699_6859527	3A	114.06
Excalibur_c64302_103	3A	115.07
AX-94833103	3A	116.08
Excalibur_c91154_175	3A	116.58
Excalibur_c13242_1178	3A	116.58
AX-94704134	3A	116.58
wsnp_Ex_rep_c69577_68526990	3A	116.58
AX-94406609	3A	118.11
BS00093377_51	3A	119.63
RAC875_c27323_867	3A	121.15
wsnp_Ex_c3478_6369892	3A	121.15
BS00074617_51	3A	175.09
BS00066319_51	3A	176.61
wsnp_Ku_c18497_27803432	3A	177.12
BS00056089_51	3A	179.16
Excalibur_c39248_485	3A	180.68
RAC875_rep_c109433_782	3A	181.18
BS00001478_51	3A	181.69
AX-94481094	3A	184.25
BS00000445_51	3A	186.82
Kukri_c35426_507	3A	187.83
Kukri_c33640_640	3A	187.83
Excalibur_c56240_200	3A	193.09
Excalibur_c60581_62	3A	198.36
AX-95232910	3A	202.53
wsnp_Ex_rep_c67786_66472676	3A	203.03
Excalibur_c56240_176	3A	203.03
BS00048355_51	3A	209.42
AX-95218695	3A	212.52
AX-95168510	3A	213.02
GENE.1549_110	3A	213.02
GENE.1981_131	3A	213.52
AX-95013434	3A	214.03
Excalibur_c17655_467	3A	214.53
Kukri_rep_c69970_717	3A	215.03
AX-94393315	3A	215.03
AX-95135391	3A	215.53
BS00106932_51	3A	216.04
BS00060391_51	3A	216.54
BS00064703_51	3A	217.04
IACX5899	3A	218.05
BS00083279_51	3A	218.05
RAC875_c79551_167	3A	223.32
Kukri_c63259_151	3A	223.32
RFL_Contig497_1114	3A	223.32
RAC875_c47550_437	3A	229.15
BS00063300_51	3A	229.65
AX-94666858	3A	230.15
RAC875_c10194_673	3A	243.87
RAC875_c15003_377	3A	243.87
Kukri_c12079_204	3A	243.87
wsnp_Ex_c27317_36522052	3A	243.87
wsnp_Ex_c1894_3575749	3A	244.38
wsnp_Ex_c12341_19693090	3A	244.38
BS00023337_51	3A	244.38
wsnp_Ex_c12341_19693570	3A	244.38
AX-95083270	3A	244.38
BS00081610_51	3A	244.38
BS00088756_51	3A	244.38
BS00060029_51	3A	244.38
Excalibur_c49743_97	3A	244.88
wsnp_CAP11_c68_106078	3A	244.88
wsnp_BG262734A_Ta_2_3	3A	244.88
RAC875_c15109_106	3A	244.88
BS00020459_51	3A	246.4
wsnp_CAP12_c15_9559	3A	247.92
wsnp_Ex_c15475_23757972	3A	249.45
Kukri_c10751_1031	3A	252.01
RAC875_rep_c90531_283	3A	252.51
wsnp_Ex_c15475_23756906	3A	253.02
Kukri_c10751_264	3A	253.02
AX-95090245	3A	253.52
BS00049977_51	3A	254.02
Excalibur_rep_c110501_525	3A	254.52
wsnp_Ex_c20250_29303152	3A	254.52
Excalibur_c24354_465	3A	259.24
BS00022884_51	3A	266.78
BS00022459_51	3A	266.78
AX-94728219	3A	266.78
BS00022804_51	3A	267.28
BS00110550_51	3A	267.79
AX-95198776	3A	267.79
AX-94961636	3A	268.29
Kukri_c49927_151	3A	268.29
wsnp_Ku_c10468_17301042	3A	269.81
AX-94905626	3A	269.81
Excalibur_c96921_206	3A	269.81
BS00081475_51	3A	270.31
Excalibur_rep_c110278_62	3A	270.31
BS00022424_51	3A	270.31
AX-94700391	3A	270.31
AX-94479553	3A	270.82
Tdurum_contig42495_389	3A	281.35
BS00023222_51	3A	281.35
IAAV1523	3A	287.18
AX-94798506	3A	290.27
Tdurum_contig55841_351	3A	290.78
Ra_c4373_453	3A	291.79
AX-94420612	3A	293.31
wsnp_Ex_c10630_17338753	3A	293.31
AX-95126026	3A	293.31
Kukri_rep_c86903_184	3A	293.31
AX-94492007	3A	293.31
AX-94611743	3A	294.32
AX-94409941	3A	294.82
wsnp_BE604885A_Ta_2_1	3A	295.83
BS00041742_51	3A	296.84
AX-94613378	3A	296.84
BobWhite_c12428_371	3A	296.84
AX-94943274	3A	300.47
BS00093889_51	3A	300.97
TG0146	3A	302.5
AX-94524087	3A	305.06
AX-94519580	3A	305.56
AX-94467710	3A	307.09
wsnp_BE426418A_Ta_2_2	3A	311.8
IAAV3851	3A	314.37
RAC875_c99055_69	3A	314.87
AX-94631122	3A	315.88
RAC875_rep_c109228_400	3A	316.38
AX-94515761	3A	316.38
AX-94555026	3A	317.39
BS00029569_51	3A	317.39
IAAV5507	3A	317.89
IAAV9044	3A	317.89
RAC875_c56516_786	3A	318.9
wsnp_Ku_c46762_53407442	3A	319.41
AX-94628933	3A	319.91
BS00097939_51	3A	319.91
RAC875_c61934_406	3A	321.43
wsnp_Ku_c217_430915	3A	323.47
Tdurum_contig36700_114	3A	323.47
AX-94603874	3A	323.47
BS00106008_51	3A	323.98
AX-95079372	3A	323.98
CAP7_c915_121	3A	324.48
RAC875_c68056_81	3A	324.98
AX-94393137	3A	325.48
Tdurum_contig93570_848	3A	325.99
AX-95163812	3A	326.49
TA003550.0145	3A	329.58
Tdurum_contig50577_620	3A	329.58
Tdurum_contig31235_99	3A	330.08
BS00086050_51	3A	330.59
BS00074926_51	3A	331.09
Ku_c12191_1123	3A	331.09
Kukri_s117946_404	3A	333.65
wsnp_Ku_c5359_9531713	3A	334.66
wsnp_Ex_c24085_33332723	3A	334.66
wsnp_Ex_c28679_37784735	3A	334.66
GENE.1464_73	3A	334.66
wsnp_Ex_rep_c66274_64426901	3A	336.71
BS00062677_51	3B	0
Tdurum_contig50954_1264	3B	0
AX-94660868	3B	0
BS00098161_51	3B	1.52
RAC875_rep_c69171_92	3B	1.52
AX-94591477	3B	3.04
Tdurum_contig50954_1393	3B	3.04
Tdurum_contig50954_880	3B	3.54
Tdurum_contig50954_394	3B	4.05
IAAV4876	3B	4.55
AX-95239240	3B	5.05
RAC875_c62483_112	3B	5.05
RAC875_rep_c69171_241	3B	6.57
[truncated: 3,438 more rows]
