# Supplementary material for: Genetics of the Inverse Relationship between Grain Yield and Grain Protein Content in Common Wheat
Source: Plants (Basel). 2022 Aug 18;11(16):2146. doi: 10.3390/plants11162146 (PMC9413592; doi:10.3390/plants11162146)
Supplement: Supplementary file 1 [file plants-11-02146-s001.zip › Table_S4.csv]

Table S4: Genes considered as candidates for the detected QTL.;;;;;
;;;;;
Gene ID RefSeq v1.1;Chromosome;Gene name;Start RefSeq v1.1;End RefSeq v1.1;Description
TraesCS2A02G130600;2A;Fd-GOGAT-2A;78328734;78346097;
TraesCS2A02G168200;2A;TaSus2-2A;121141338;121145857;"Sucrose synthase [Source:UniProtKB/TrEMBL;Acc:A0A341Q089]"
TraesCS2A02G295400;2A;TaCwi-A1;508030243;508034286;
TraesCS2A02G389900;2A;;638684152;638689169;"Glutamate dehydrogenase [Source:UniProtKB/TrEMBL;Acc:W5ARG6]"
TraesCS2A02G406700;2A;;662338440;662342920;"Sucrose synthase [Source:UniProtKB/TrEMBL;Acc:W5AUQ5]"
TraesCS2A02G500400;2A;TaGS2-A1;729293649;729297303;"Glutamine synthetase [Source:UniProtKB/TrEMBL;Acc:Q45NB2]"
TraesCS2B02G152900;2B;Fd-GOGAT-2B;121354806;121371191;
TraesCS2B02G194200;2B;TaSus2-2B;171030105;171036053;"Sucrose synthase [Source:UniProtKB/TrEMBL;Acc:A0A1D5U769]"
TraesCS2B02G409300;2B;;582802764;582810246;"Glutamate dehydrogenase [Source:UniProtKB/TrEMBL;Acc:W5BS00]"
TraesCS2B02G424300;2B;;610415870;610420284;"Sucrose synthase [Source:UniProtKB/TrEMBL;Acc:W5BF91]"
TraesCS2B02G528300;2B;TaGS2-B1;722629776;722634436;"Glutamine synthetase [Source:UniProtKB/TrEMBL;Acc:A0A1D5TVU1]"
TraesCS2D02G132900;2D;Fd-GOGAT-2D;78375985;78392563;
TraesCS2D02G175600;2D;TaSus2-2D;119066592;119072213;"Sucrose synthase [Source:UniProtKB/TrEMBL;Acc:A0A341R6M6]"
TraesCS2D02G388800;2D;;495094728;495101871;"Glutamate dehydrogenase [Source:UniProtKB/TrEMBL;Acc:A0A341REK8]"
TraesCS2D02G403600;2D;;518265279;518269636;"Sucrose synthase [Source:UniProtKB/TrEMBL;Acc:A0A1D6RP57]"
TraesCS2D02G500600;2D;TaGS2-D1;595161545;595165983;"Glutamine synthetase [Source:UniProtKB/TrEMBL;Acc:Q45NB2]"
TraesCS3A02G254000;3A;NRT2.5-3A ;475304797;475306341;"High affinity nitrate transporter 2.5 [Source:Projected from Arabidopsis thaliana (AT1G12940) UniProtKB/Swiss-Prot;Acc:Q9LPV5]"
TraesCS3A02G266300;3A;NADH-GOGAT-3A;490922100;490932750;
TraesCS3B02G285900;3B;;457633984;457635782;"High affinity nitrate transporter 2.5 [Source:Projected from Arabidopsis thaliana (AT1G12940) UniProtKB/Swiss-Prot;Acc:Q9LPV5]"
TraesCS3B02G299800;3B;NADH-GOGAT-3B;481595302;481606660;
TraesCS3B02G420700;3B;TaAAP6-3B;657780904;657784744;
TraesCS3D02G143500;3D;TaCKX6-D1;106736568;106740664;
TraesCS3D02G266400;3D;NADH-GOGAT-3D;369790549;369802074;
TraesCS4A02G063800;4A;TaGSr-4A;60668121;60671232;"Glutamine synthetase [Source:UniProtKB/TrEMBL;Acc:A0A0C4BJG7]"
TraesCS4A02G140000;4A;;213024884;213036054;"Sucrose synthase [Source:UniProtKB/TrEMBL;Acc:A0A1D6DDQ0]"
TraesCS4A02G266900;4A;TaGSe-4A;579428158;579431177;"Glutamine synthetase [Source:UniProtKB/TrEMBL;Acc:A0A1D5WYB9]"
TraesCS4A02G321700;4A;TaCwi-4A;610034075;610036709;
TraesCS4A02G376700;4A;NR1.2-4A ;651365942;651370213;"Nitrate reductase [Source:UniProtKB/TrEMBL;Acc:A0A341TPK2]"
TraesCS4A02G446700;4A;;714175903;714181005;"Sucrose synthase [Source:UniProtKB/TrEMBL;Acc:A0A1D6SCP9]"
TraesCS4A02G474000;4A;TaGS3-4A;733693080;733695651;"GS-4A [Source:UniProtKB/TrEMBL;Acc:A0A1D5X822]"
TraesCS4A02G492600;4A;;741545979;741549092;"Sucrose synthase [Source:UniProtKB/TrEMBL;Acc:A0A341U026]"
TraesCS4B02G043100;4B;Rht-B1;30861268;30863723;"DELLA protein [Source:UniProtKB/TrEMBL;Acc:G9DDS0]"
TraesCS4B02G047400;4B;TaGSe-4B;34722272;34725256;"Glutamine synthetase [Source:UniProtKB/TrEMBL;Acc:Q6RUI9]"
TraesCS4B02G167500;4B;;364656435;364682505;"Sucrose synthase [Source:UniProtKB/TrEMBL;Acc:A0A341UCN4]"
TraesCS4B02G240900;4B;TaGSr-4B;499898695;499901767;"Glutamine synthetase [Source:UniProtKB/TrEMBL;Acc:Q6RUJ2]"
TraesCS4D02G040400;4D;Rht-D1;18781062;18782933;"DELLA protein RHT-1 [Source:UniProtKB/Swiss-Prot;Acc:Q9ST59]"
TraesCS4D02G047400;4D;TaGSe-4D;22946578;22949866;"Glutamine synthetase [Source:UniProtKB/TrEMBL;Acc:Q6RUJ0]"
TraesCS4D02G169800;4D;;295013101;295026519;"Sucrose synthase [Source:UniProtKB/TrEMBL;Acc:A0A341UU53]"
TraesCS4D02G240700;4D;TaGSr-4D;403145655;403148815;"Glutamine synthetase [Source:UniProtKB/TrEMBL;Acc:Q6RUJ1]"
TraesCS5A02G069500;5A;TaSnRK2.9-5A;78157536;78160032;Serine/threonine protein kinase	Abscisic acid (ABA)-activated protein kinase	Hyperosmotic stress response	ABA signal transductio [Source: Projected from Oryza sativa (Os12g0586100)]
TraesCS5A02G216200;5A;;432443060;432447900;"Putative alanine aminotransferase [Source:UniProtKB/TrEMBL;Acc:A0A1D5YM85]"
TraesCS5A02G434100;5A;;617207310;617212776;"Glutamate dehydrogenase [Source:UniProtKB/TrEMBL;Acc:E9NX12]"
TraesCS5B02G214700;5B;;387740023;387744651;"Putative alanine aminotransferase [Source:UniProtKB/TrEMBL;Acc:W5FER5]"
TraesCS5B02G437100;5B;;610500014;610503552;"Glutamate dehydrogenase [Source:UniProtKB/TrEMBL;Acc:A0A341VUZ0]"
TraesCS5D02G224200;5D;;332040151;332044580;"Putative alanine aminotransferase [Source:UniProtKB/TrEMBL;Acc:W5FWW5]"
TraesCS5D02G442000;5D;;494216160;494219691;"Glutamate dehydrogenase [Source:UniProtKB/TrEMBL;Acc:A0A1D5ZWQ6]"
TraesCS5D02G552900;5D;TaCwi-5D;557945818;557948854;
TraesCS6A02G017500;6A;NR1.1-6A ;8694483;8700180;"Nitrate reductase [Source:UniProtKB/TrEMBL;Acc:A0A1D6AGQ2]"
TraesCS6A02G189300;6A;TaGW2-6A;237734651;237760058;"GW2A [Source:UniProtKB/TrEMBL;Acc:A0A097ET43]"
TraesCS6A02G221900;6A;Rht24;413732327;413735532;
TraesCS6A02G298100;6A;;531394366;531398363;"Glutamine synthetase [Source:UniProtKB/TrEMBL;Acc:Q45NB7]"
TraesCS6A02G326200;6A;;559523404;559526788;"Nitrate reductase [Source:UniProtKB/TrEMBL;Acc:A0A1D6A963]"
TraesCS6A02G333900;6A;NiR-6A ;564882616;564886300;"Ferredoxin--nitrite reductase	chloroplastic [Source:Projected from Arabidopsis thaliana (AT2G15620) UniProtKB/Swiss-Prot;Acc:Q39161]"
TraesCS6B02G024900;6B;NR1.1-6B;15128191;15134280;"Nitrate reductase [Source:UniProtKB/TrEMBL;Acc:A0A1D6B0H5]"
TraesCS6B02G044300;6B;;26625403;26626926;"High affinity nitrate transporter TaNRT2 [Source:UniProtKB/TrEMBL;Acc:Q9FYU4]"
TraesCS6B02G215300;6B;TaGW2-6B;291761229;291778752;"GW2-B [Source:UniProtKB/TrEMBL;Acc:K7QJZ1]"
TraesCS6B02G327500;6B;;577183711;577187787;"Glutamine synthetase [Source:UniProtKB/TrEMBL;Acc:Q45NB6]"
TraesCS6B02G356800;6B;;625241370;625244779;"Nitrate reductase [Source:UniProtKB/TrEMBL;Acc:A0A1D6S9I8]"
TraesCS6B02G364600;6B;;636392631;636397024;"Ferredoxin--nitrite reductase	chloroplastic [Source:Projected from Arabidopsis thaliana (AT2G15620) UniProtKB/Swiss-Prot;Acc:Q39161]"
TraesCS6B02G466600;6B;;716618123;716622318;"Sucrose synthase [Source:UniProtKB/TrEMBL;Acc:A0A1D6AKV9]"
TraesCS6D02G020700;6D;NR1.1-6D;8149929;8155961;"Nitrate reductase [Source:UniProtKB/TrEMBL;Acc:A0A1D6BFW2]"
TraesCS6D02G176900;6D;TaGW2-6D;175712228;175721507;
TraesCS6D02G306000;6D;;414622355;414625758;"Nitrate reductase [Source:UniProtKB/TrEMBL;Acc:A0A1D6B9M1]"
TraesCS6D02G313100;6D;;422078484;422081985;"Ferredoxin--nitrite reductase	chloroplastic [Source:Projected from Arabidopsis thaliana (AT2G15620) UniProtKB/Swiss-Prot;Acc:Q39161]"
TraesCS6D02G403800;6D;;471917727;471921914;"Sucrose synthase [Source:UniProtKB/TrEMBL;Acc:A0A1D6B903]"
TraesCS7A02G017700;7A;TaGS3-7A;7598040;7600527;"GS-7A [Source:UniProtKB/TrEMBL;Acc:W5HCG0]"
TraesCS7A02G040900;7A;;19002179;19007777;"Sucrose synthase [Source:UniProtKB/TrEMBL;Acc:A0A1D6SCP9]"
TraesCS7A02G078500;7A;NR1.2-7A;43180494;43185382;"Nitrate reductase [Source:UniProtKB/TrEMBL;Acc:A0A341XQF7]"
TraesCS7A02G108900;7A;TaTEF-7A;66227700;66229929;"Transcription elongation factor 1 homolog [Source:UniProtKB/TrEMBL;Acc:W5HIH8]"
TraesCS7A02G158900;7A;TaSus1-7A;115203634;115208689;"Sucrose synthase [Source:UniProtKB/TrEMBL;Acc:A0A1D6SCX5]"
TraesCS7A02G208100;7A;TaGASR7-A1;170684128;170685116;"GA-induced protein [Source:UniProtKB/TrEMBL;Acc:B8PS17]"
TraesCS7A02G428500;7A;NRT2.6-7A;621910950;621913739;High-affinity nitrate transporter	Nitrate transport	Auxin signalin [Source: Projected from Oryza sativa (Os01g0547600)]
TraesCS7A02G481600;7A;WAPO-A1;674081462;674082918;"Uncharacterized protein At1g30950 (Fragment) [Source:Projected from Arabidopsis thaliana (AT1G30950) UniProtKB/TrEMBL;Acc:C0SUY4]"
TraesCS7A02G557600;7A;;730425419;730429850;"Sucrose synthase [Source:UniProtKB/TrEMBL;Acc:A0A1D6DFI7]"
TraesCS7B02G063400;7B;TaSus1-7B;68344037;68349270;"Sucrose synthase [Source:UniProtKB/TrEMBL;Acc:A0A341YPC9]"
TraesCS7B02G328700;7B;NRT2.6-7B;583923053;583926829;High-affinity nitrate transporter	Nitrate transport	Auxin signalin [Source: Projected from Oryza sativa (Os01g0547600)]
TraesCS7B02G384000;7B;WAPO-B1;649950255;649951851;"Uncharacterized protein At1g30950 (Fragment) [Source:Projected from Arabidopsis thaliana (AT1G30950) UniProtKB/TrEMBL;Acc:C0SUY4]"
TraesCS7B02G482200;7B;;740032525;740041980;"Sucrose synthase [Source:UniProtKB/TrEMBL;Acc:A0A1D6C3W0]"
TraesCS7D02G015000;7D;TaGS3-7D;6483046;6485989;
TraesCS7D02G036600;7D;;18678820;18684207;"Sucrose synthase [Source:UniProtKB/TrEMBL;Acc:A0A1D6D1F6]"
TraesCS7D02G073700;7D;NR1.2-7D;43212472;43217253;"Nitrate reductase [Source:UniProtKB/TrEMBL;Acc:A0A341Z858]"
TraesCS7D02G159800;7D;TaSus1-7D;109170863;109176000;"Sucrose synthase [Source:UniProtKB/TrEMBL;Acc:A0A341Z619]"
TraesCS7D02G420900;7D;NRT2.6-7D;540617018;540627808;High-affinity nitrate transporter	Nitrate transport	Auxin signalin [Source: Projected from Oryza sativa (Os01g0547600)]
TraesCS7D02G552800;7D;;635584924;635589335;"Sucrose synthase [Source:UniProtKB/TrEMBL;Acc:W5HZ78]"
